# Supplementary material for: Long-term quality of integrated community case management care for children in Bugoye Subcounty, Uganda: a retrospective observational study
Source: PubMed Central journal article supplement — BMJ Open. 2022 Apr 22;12(4):e051015. doi: 10.1136/bmjopen-2021-051015 (PMC9036460; doi:10.1136/bmjopen-2021-051015), 2022-04-22
Supplement: bmjopen-2021-051015.draft_revisions.pdf [file bmjopen-2021-051015.draft_revisions.pdf]

# BMJ Open

BMJ Open is committed to open peer review. As part of this commitment we make the peer review history of every article we publish publicly available.

When an article is published we post the peer reviewers' comments and the authors' responses online. We also post the versions of the paper that were used during peer review. These are the versions that the peer review comments apply to.

The versions of the paper that follow are the versions that were submitted during the peer review process. They are not the versions of record or the final published versions. They should not be cited or distributed as the published version of this manuscript.

BMJ Open is an open access journal and the full, final, typeset and author-corrected version of record of the manuscript is available on our site with no access controls, subscription charges or pay-per-view fees (<http://bmjopen.bmj.com>).

If you have any questions on BMJ Open's open peer review process please email [info.bmjopen@bmj.com](mailto:info.bmjopen@bmj.com)

# BMJ Open

## Long-term quality of Integrated Community Case Management care: a retrospective observational study in Bugoye Subcounty, Uganda

|                               |                                                                                                                                                                                                                                                                                                                                                                                                                                                                                                                                                                                                                                                                                                                                                                                                                                                                                                                                                                                                                                                                                                                                                                                                                                                                                                                                  |
|-------------------------------|----------------------------------------------------------------------------------------------------------------------------------------------------------------------------------------------------------------------------------------------------------------------------------------------------------------------------------------------------------------------------------------------------------------------------------------------------------------------------------------------------------------------------------------------------------------------------------------------------------------------------------------------------------------------------------------------------------------------------------------------------------------------------------------------------------------------------------------------------------------------------------------------------------------------------------------------------------------------------------------------------------------------------------------------------------------------------------------------------------------------------------------------------------------------------------------------------------------------------------------------------------------------------------------------------------------------------------|
| Journal:                      | <i>BMJ Open</i>                                                                                                                                                                                                                                                                                                                                                                                                                                                                                                                                                                                                                                                                                                                                                                                                                                                                                                                                                                                                                                                                                                                                                                                                                                                                                                                  |
| Manuscript ID                 | bmjopen-2021-051015                                                                                                                                                                                                                                                                                                                                                                                                                                                                                                                                                                                                                                                                                                                                                                                                                                                                                                                                                                                                                                                                                                                                                                                                                                                                                                              |
| Article Type:                 | Original research                                                                                                                                                                                                                                                                                                                                                                                                                                                                                                                                                                                                                                                                                                                                                                                                                                                                                                                                                                                                                                                                                                                                                                                                                                                                                                                |
| Date Submitted by the Author: | 10-Mar-2021                                                                                                                                                                                                                                                                                                                                                                                                                                                                                                                                                                                                                                                                                                                                                                                                                                                                                                                                                                                                                                                                                                                                                                                                                                                                                                                      |
| Complete List of Authors:     | Miller, James S.; Massachusetts General Hospital; Harvard Medical School<br>Mulogo, Edgar; Mbarara University of Science and Technology Faculty of Medicine, Community health; Bugoye Community Health Collaboration<br>Wesuta, Andrew ; Bugoye Community Health Collaboration ; Global Health Collaborative—MUST Uganda<br>Mumbere, Nobert; Bugoye Community Health Collaboration ; Global Health Collaborative—MUST Uganda<br>Mbaju, Jackson; Bugoye Community Health Collaboration ; Global Health Collaborative—MUST Uganda<br>Matte, Michael; Bugoye Community Health Collaboration ; Global Health Collaborative—MUST Uganda<br>Ntaro, Moses; Mbarara University of Science and Technology Faculty of Medicine, Community health; Bugoye Community Health Collaboration<br>Guiles, Daniel; Indiana University School of Medicine<br>Patel, Palka; Indiana University School of Medicine<br>Bwambale, Shem; Bugoye Health Center; Bugoye Community Health Collaboration<br>Kenney, Jessica; Massachusetts General Hospital; Bugoye Community Health Collaboration<br>Reyes, Raquel ; University of North Carolina at Chapel Hill, 5039 Old Clinic Building, CB 7110, Chapel Hill, 27599, USA., Division of General Medicine & Clinical Epidemiology<br>Stone, Geren; Massachusetts General Hospital; Harvard Medical School |
| Keywords:                     | Quality in health care < HEALTH SERVICES ADMINISTRATION & MANAGEMENT, Tropical medicine < INFECTIOUS DISEASES, Community child health < PAEDIATRICS, PRIMARY CARE                                                                                                                                                                                                                                                                                                                                                                                                                                                                                                                                                                                                                                                                                                                                                                                                                                                                                                                                                                                                                                                                                                                                                                |
|                               |                                                                                                                                                                                                                                                                                                                                                                                                                                                                                                                                                                                                                                                                                                                                                                                                                                                                                                                                                                                                                                                                                                                                                                                                                                                                                                                                  |

SCHOLARONE™  
Manuscripts

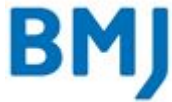

I, the Submitting Author has the right to grant and does grant on behalf of all authors of the Work (as defined in the below author licence), an exclusive licence and/or a non-exclusive licence for contributions from authors who are: i) UK Crown employees; ii) where BMJ has agreed a CC-BY licence shall apply, and/or iii) in accordance with the terms applicable for US Federal Government officers or employees acting as part of their official duties; on a worldwide, perpetual, irrevocable, royalty-free basis to BMJ Publishing Group Ltd ("BMJ") its licensees and where the relevant Journal is co-owned by BMJ to the co-owners of the Journal, to publish the Work in this journal and any other BMJ products and to exploit all rights, as set out in our [licence](#).

The Submitting Author accepts and understands that any supply made under these terms is made by BMJ to the Submitting Author unless you are acting as an employee on behalf of your employer or a postgraduate student of an affiliated institution which is paying any applicable article publishing charge ("APC") for Open Access articles. Where the Submitting Author wishes to make the Work available on an Open Access basis (and intends to pay the relevant APC), the terms of reuse of such Open Access shall be governed by a Creative Commons licence – details of these licences and which [Creative Commons](#) licence will apply to this Work are set out in our licence referred to above.

Other than as permitted in any relevant BMJ Author's Self Archiving Policies, I confirm this Work has not been accepted for publication elsewhere, is not being considered for publication elsewhere and does not duplicate material already published. I confirm all authors consent to publication of this Work and authorise the granting of this licence.

1  
2  
3 **Long-term quality of Integrated Community Case Management care: a retrospective**  
4 **observational study in Bugoye Subcounty, Uganda**  
5

6  
7 James S. Miller<sup>1,2\*</sup>, Edgar Mugema Mulogo<sup>3,4\*</sup>, Andrew Christopher Wesuta<sup>4,5</sup>, Nobert  
8 Mumbere<sup>4,5</sup>, Jackson Mbaju<sup>4,5</sup>, Michael Matte<sup>4,5</sup>, Moses Ntaro<sup>3,4</sup>, Daniel A. Guiles<sup>6</sup>, Palka R.  
9 Patel<sup>6</sup>, Shem Bwambale<sup>4,7</sup>, Jessica Kenney<sup>1,4</sup>, Raquel Reyes<sup>8</sup>, and Geren S. Stone<sup>1,2</sup>  
10

11  
12 \*These authors contributed equally to this work  
13

14 Corresponding author: James S. Miller, MGH Global Health, 125 Nashua Street, Suite 722,  
15 Boston, MA 02114, USA; jsmiller@post.harvard.edu  
16

17  
18 <sup>1</sup>Massachusetts General Hospital

19 <sup>2</sup>Harvard Medical School

20 <sup>3</sup>Mbarara University of Science and Technology

21 <sup>4</sup>Bugoye Community Health Collaboration

22 <sup>5</sup>Global Health Collaborative—MUST Uganda

23 <sup>6</sup>Indiana University School of Medicine

24 <sup>7</sup>Bugoye Health Center

25 <sup>8</sup>University of North Carolina School of Medicine  
26  
27

28  
29 **Word count:** 3442  
30

31 **Keywords:** Village health workers, Integrated Community Case Management, quality of health  
32 care, Uganda  
33  
34  
35  
36  
37  
38  
39  
40  
41  
42  
43  
44  
45  
46  
47  
48  
49  
50  
51  
52  
53  
54  
55  
56  
57  
58  
59  
60

## Abstract

**Objectives:** We examine quality of Integrated Community Case Management (iCCM) care provided by two cohorts of village health workers (VHW), as well as trends over time in quality of care as VHWs gain clinical experience but are also further from their initial iCCM training.

**Setting:** community-based care at a single rural site. The first cohort of VHWs began providing iCCM care in March 2013, the second cohort in July 2016.

**Participants:** all patients receiving iCCM care in 18,430 clinical encounters occurring between April 2014–December 2018.

**Primary and secondary outcome measures:** Primary outcome measures include proportion of patients receiving overall correct care and trends over time in quality of care (assessed using logistic regression models with generalized estimating equations). Secondary outcome measures include VHWs' adherence to correct diagnostic protocol, correct prescribing practices, and correct referral of patients to a health facility. Pre-planned and final measures were the same.

**Results:** Overall, 74% of patients received correct management. Quality of care was higher for uncomplicated malaria (93%), presumed pneumonia (90%), and diarrhea (92%). For patients with danger signs for severe illness, 77% received appropriate referral to a health facility, while only 60% received appropriate pre-referral treatment. VHWs commonly failed to refer patients with subjective fever and a negative malaria test. Inappropriate use of medications was generally low. For the first cohort of VHWs, regression modeling demonstrated a modest increase in quality of care until approximately 3 years after their initial iCCM training, followed by a modest decrease in quality of care. For the second cohort, quality of care was essentially constant over time.

**Conclusions:** Quality of care was high for uncomplicated malaria, presumed pneumonia, and diarrhea. Quality of care was relatively constant over time, though the trend toward decreasing quality of care after 3 years of providing iCCM care requires further monitoring.

### Strengths and limitations of this study

- We use a record review approach to examine quality of care for all Integrated Community Case Management clinical encounters over a nearly 5-year period
- We assessed trends in quality of care over time using logistic regression models with generalized estimating equations (GEE) with robust standard errors to account for correlation by VHW
- A record review approach cannot assess all aspects of appropriate care, and may overestimate quality of care

- While this study assesses a large number of patient encounters, it includes a fairly small number of VHWs in a single geographic area, limiting its generalizability

## INTRODUCTION

In Integrated Community Case Management (iCCM) care, village health workers (VHW) or other lay workers provide protocol-based care for priority pediatric health conditions—often malaria, pneumonia, and diarrhea—usually in a community setting rather than at a health facility. In some parts of Uganda, volunteer VHWs provide iCCM care, either in the patient’s home or at the VHW’s home, as part of the national Village Health Teams system[1–3]. These VHWs also retain their existing roles in health promotion efforts. In Bugoye Subcounty, Uganda, a rural, mountainous area on the western edge of the country, VHWs from the national program have provided iCCM care since 2013, with financial and operational support from a longstanding collaboration with Mbarara University of Science and Technology and the Massachusetts General Hospital.

Prior studies have employed several different approaches to assess iCCM quality of care, including direct observation of VHWs (with or without reexamination of the patient by a trained clinician), review of VHWs’ clinical records, and surveys of patients’ caregivers. In Uganda, prior studies using direct observation[4], record review[5], and surveys of caregivers[6] have generally demonstrated excellent quality of care. However, there are few evaluations examining changes in iCCM care quality over time. One prior study in Kenya used direct observation of VHWs and reexamination of patients, with 3 evaluations conducted over the 4-year period after VHWs’ initial iCCM training. This study demonstrated improvement in some quality measures and worsening of other measures over time but did not assess for an overall trend in quality over time[7]. We previously examined trends in quality of care over the first 2 years of the iCCM program in Bugoye using a record review approach, showing improvement over the initial 6 months after iCCM care initiation and stable quality of care for the remaining 18 months[8]. Several other studies have examined quality of care provided by VHWs with differing levels of experience but have not provided results stratified by experience level[9,10]. Studies by our group and others have also examined the specific iCCM skills of performing and interpreting RDTs for malaria, finding that VHWs are able to maintain these skills over a 1–4 year period[11–13].

Since iCCM programs provide frontline care for common but potentially fatal childhood illnesses, programs must be able to monitor and ensure quality of care over time. Here we describe quality of iCCM care over a nearly 5-year period, as VHWs gain clinical experience but are also further from their initial iCCM training.

## METHODS

### Study design

1  
2  
3 In this retrospective, observational study, we examine overall iCCM quality of care as well as  
4 specific components of iCCM care for two cohorts of VHWs using a record review approach for  
5 all clinical encounters occurring between April 2014–December 2018. For each cohort we also  
6 examine trends in quality of care over time. For the first cohort of VHWs, we sought to assess  
7 long-term trends in quality of care, building on the prior evaluation of the first 2 years of iCCM  
8 care provided by this cohort[8]. For the second cohort of VHWs, we sought to assess quality of  
9 care over the initial 2.5 years of iCCM care provided by this cohort, using a larger dataset of all  
10 clinical encounters rather than sampled encounters to further evaluate our prior findings on  
11 quality of iCCM care after initial training.  
12  
13  
14

### 15 **Study setting**

16 VHWs in Bugoye are selected by community members in their villages as part of the national  
17 Village Health Teams program and serve their communities as part-time volunteers. All VHWs  
18 are required to have achieved basic literacy, and most have completed primary school. VHWs  
19 receive 3 days of initial general training, 5 days of initial iCCM training, and half-day refresher  
20 trainings on a quarterly basis. In addition to their other responsibilities, VHWs provide iCCM  
21 care for malaria, pneumonia, and diarrhea in children between 2 months and 5 years old,  
22 including performing rapid diagnostic tests for malaria (RDT) and treating with artemisinin  
23 combination therapy (ACT), measuring respiratory rate and treating presumed pneumonia with  
24 amoxicillin, and evaluating children with diarrhea and treating with oral rehydration solution  
25 (ORS) and zinc. VHWs also refer children with other conditions or with danger signs of severe  
26 illness to a formal health facility. The first cohort (24 VHWs) began providing iCCM care in  
27 March 2013 in 5 villages; one VHW was added in 2016 to replace a VHW who had moved away.  
28 The second cohort (14 VHWs) began providing iCCM care in July 2016 in 3 additional villages.  
29 Both cohorts received the same initial training, refresher trainings, and supervision.  
30  
31  
32  
33  
34

### 35 **Data collection**

36 During the time period assessed in this study, VHWs in Bugoye used paper records to record  
37 information from each clinical encounter. At the end of each month, program staff collected  
38 the paper records and entered information from each clinical encounter into a customized  
39 Epidata clinical database[14].  
40  
41

42 Deidentified data for all encounters from April 2014–December 2018 (reflecting all available  
43 months in the electronic clinical database) were extracted to create the research dataset used  
44 for this study. Data were then cleaned, with comparison to paper records in case of a mismatch  
45 between similar variables (e.g., report month and visit date) or other suspected inaccuracies.  
46 Infants under 2 months of age were excluded from analysis as they were likely seen for  
47 newborn wellness checks separate from iCCM care. Stata Version 15 (StataCorp, College  
48 Station, TX) was used to check for presumed duplicate entries in the database. Decision rules in  
49 Stata were used to determine whether each patient received correct care according to the  
50 iCCM protocol, within the limits of the data recorded on the paper record form.  
51  
52  
53

### 54 **Data analysis**

55  
56  
57  
58  
59  
60

1  
2  
3 The analytic methods for this study are quite similar to our prior study of iCCM care quality over  
4 the initial 2 years of this program[8]. In brief, along with overall correct management, we  
5 assessed several specific domains of quality of care, including correct diagnostic protocol  
6 (measuring respiratory rate for all patients presenting with cough or respiratory distress,  
7 performing a malaria RDT for all patients presenting with subjective fever), correct prescribing  
8 practices (both provision of correct treatment and avoidance of providing medications not  
9 indicated by the protocol), and correct referral of patients needing clinician assessment or  
10 other facility-based care. Since failure to refer a patient with subjective fever and a negative  
11 RDT was a common and likely low-consequence error [15], we also examined the overall  
12 proportion of patients receiving correct care if this error is excluded.  
13  
14  
15

16  
17 We also examined the proportion of VHWs providing correct care for each of the main iCCM  
18 conditions, using thresholds of 70% and 84% of encounters with correct care. These thresholds  
19 were chosen to accord with our prior findings which employed a lot quality assurance sampling  
20 approach[8].  
21

22  
23 We assessed trends in quality of care over time using logistic regression models with  
24 generalized estimating equations (GEE) with robust standard errors to account for correlation  
25 by VHW. For this analysis, we used a dichotomous outcome variable representing correct or  
26 incorrect care according to the iCCM protocol, with time since the VHW began providing iCCM  
27 care as the exposure variable. We used the quasi-likelihood under the independence criterion  
28 (QIC) to assess model fit. The VHW who was added at a later time in an initial village was  
29 excluded from this portion of analysis.  
30  
31

### 32 **Ethics approval**

33 Ethical approval for this study was granted by the Partners Healthcare IRB and the Research  
34 Ethics Committee at the Mbarara University of Science and Technology. Because the study  
35 involved only analysis of deidentified clinical records, individual patients' caregivers were not  
36 consented for the study.  
37  
38

### 39 **Patient and public involvement**

40 While patients' families were not directly involved in developing the research question or  
41 outcome measures for this study, community members play a key role in selecting the VHWs  
42 who provide care in their communities. In a separate study we have also sought to understand  
43 families' experience of and satisfaction with iCCM care to identify program strengths and areas  
44 for improvement[16]. Evaluation of iCCM quality of care has also helped tailor the content of  
45 VHW refresher trainings and other quality improvement efforts.  
46  
47  
48

## 49 **RESULTS**

50 After exclusion of 48 encounters for children under 2 months old and 339 presumed duplicate  
51 entries, VHWs completed a total of 18,430 clinical encounters between April 2014–December  
52 2018. VHWs in the first cohort accounted for 74% of these encounters (Table 1). The proportion  
53 of female patients and mean age of patients were similar between the first cohort and second  
54 cohort of VHWs. Subjective fever was the most common presenting complaint, followed by  
55  
56  
57  
58  
59



cough/fast breathing, and then diarrhea (59%, 45%, and 28%, respectively; percentages add to >100% because some patients presented with multiple complaints). In both cohorts, VHWs recorded the presence of danger signs in 1% of clinical encounters.

Table 1: Patient demographic information and summary of all Integrated Community Case Management clinical encounters (April 2014–December 2018 for first cohort VHWs, July 2016–December 2018 for second cohort VHWs)

| Measure                                 | n (%) or mean (range) |                    |              |
|-----------------------------------------|-----------------------|--------------------|--------------|
|                                         | First cohort VHWs     | Second cohort VHWs | Overall      |
| Total encounters*                       | 13,650 (74%)          | 4,780 (26%)        | 18,430       |
| Female                                  | 6,780 (50%)           | 2,325 (49%)        | 9,105 (49%)  |
| Age in months**                         | 28.5 (2–60)           | 27.0 (2–60)        | 28.1 (2–60)  |
| <i>Presenting complaints***</i>         |                       |                    |              |
| Fever                                   | 8,418 (62%)           | 2,394 (50%)        | 10,812 (59%) |
| Cough/fast breathing                    | 5,890 (43%)           | 2,449 (51%)        | 8,339 (45%)  |
| Diarrhea                                | 3,818 (28%)           | 1,352 (28%)        | 5,170 (28%)  |
| Other/not recorded                      | 600 (4%)              | 149 (3%)           | 749 (4%)     |
| Patients with danger signs              | 171 (1%)              | 58 (1%)            | 229 (1%)     |
| <i>Actions/outcomes</i>                 |                       |                    |              |
| Respiratory rate measured               | 6,377 (47%)           | 2,472 (52%)        | 8,849 (48%)  |
| Respiratory rate elevated               | 5,756 (90%)           | 2,293 (93%)        | 8,049 (91%)  |
| RDT performed                           | 9,316 (68%)           | 2,715 (57%)        | 12,031 (65%) |
| RDT positive                            | 7,060 (76%)           | 1,719 (63%)        | 8,779 (73%)  |
| Patients treated with ACT               | 7,022 (51%)           | 1,706 (36%)        | 8,728 (47%)  |
| Patients treated with amoxicillin       | 5,972 (44%)           | 2,457 (51%)        | 8,429 (46%)  |
| Patients treated with ORS and zinc      | 3,841 (28%)           | 1,331 (28%)        | 5,172 (28%)  |
| Patients treated with rectal artesunate | 95 (1%)               | 38 (1%)            | 133 (1%)     |
| Patients referred to health center      | 783 (6%)              | 303 (6%)           | 1,086 (6%)   |
| Medication reactions                    | 2 (0.01%)             | 0 (0%)             | 2 (0.01%)    |
| Deaths                                  | 1 (0.01%)             | 1 (0.02%)          | 2 (0.01%)    |

Abbreviations: ACT, artemisinin combination therapy; ORS, oral rehydration solution; RDT, rapid diagnostic test for malaria; VHW, village health worker

\*339 presumed duplicate encounters as well as 76 encounters with no clinical information recorded are excluded from the analysis

\*\*48 infants under 2 months of age were excluded from the analysis as they were likely seen for newborn assessments rather than iCCM care

\*\*\*Percentages add to >100%, as some patients presented with multiple complaints

For patients with measured respiratory rate, 91% had a respiratory rate above age-based cutoffs. VHWs performed a total of 12,031 malaria RDTs, of which 8,879 (73%) were positive. There were 8,728 patients treated with ACT, 8,429 patients treated with amoxicillin, and 5,172 patients treated with oral rehydration salts and zinc. Higher proportions of patients treated by

VHWs in the first cohort presented with fever (62% vs. 50%), received an RDT (68% vs. 57%), and had positive RDTs (76% vs. 63%). Correspondingly, a higher proportion of patients treated by VHWs in the first cohort received ACT (51% vs. 36%). There were 133 patients (1%) treated with rectal artesunate, and 1,086 (6%) referred to the health center. There were 2 patients recorded as having adverse reactions to medications, and 2 recorded deaths (Table 1).

Regarding quality measures, 97% of patients presenting with subjective fever correctly received an RDT (98% of those treated by VHWs in the first cohort vs. 94% of those treated by VHWs in the second cohort). Of patients diagnosed with malaria by RDT, 93% received correct management (94% vs. 88%). However, of patients with a negative RDT, only 23% were appropriately referred to the health center (21% vs. 26%). Of patients presenting with cough or subjective fast breathing, 96% had their respiratory rate recorded (97% vs. 94%). Of those with an elevated respiratory rate and thus presumed pneumonia based on the iCCM algorithm, 90% received correct treatment (92% vs. 90%). Of patients with danger signs, 77% were appropriately referred to the health center (80% vs 69%), and 60% received appropriate pre-referral treatment (56% vs. 72%); see Table 2.

Table 2: Integrated Community Case Management quality of care measures

| Measure                                                                                  | First cohort VHWs<br>n (%) | Second cohort VHWs<br>n (%) | Overall<br>n (%) |
|------------------------------------------------------------------------------------------|----------------------------|-----------------------------|------------------|
| RDT performed for patient presenting with fever                                          | 8,278 (98%)                | 2,258 (94%)                 | 10, 536 (97%)    |
| Malaria patients receiving correct management                                            | 6,864 (94%)                | 1,617 (88%)                 | 8,481 (93%)      |
| Patients with negative RDT receiving correct management                                  | 323 (21%)                  | 172 (26%)                   | 495 (23%)        |
| Respiratory rate recorded for patient presenting with cough or subjective fast breathing | 5,693 (97%)                | 2,305 (94%)                 | 7,998 (96%)      |
| Patients with elevated respiratory rate receiving correct treatment                      | 5,625 (92%)                | 2,200 (86%)                 | 7,825 (90%)      |
| Patients with diarrhea receiving ORS and zinc                                            | 3,699 (92%)                | 1,281 (90%)                 | 4,980 (92%)      |
| Patients inappropriately treated with ACT (out of total patients)                        | 182 (1%)                   | 100 (2%)                    | 282 (2%)         |
| Inappropriate ACT prescriptions (out of total ACT prescriptions)                         | 182 (3%)                   | 100 (6%)                    | 282 (3%)         |
| Patients inappropriately treated with amoxicillin (out of total patients)                | 343 (3%)                   | 256 (5%)                    | 599 (3%)         |
| Inappropriate amoxicillin prescriptions (out of total amoxicillin prescriptions)         | 343 (6%)                   | 256 (10%)                   | 599 (7%)         |
| Patients inappropriately treated with ORS, zinc, or both (out of total patients)         | 188 (1%)                   | 73 (2%)                     | 261 (1%)         |
| Inappropriate ORS or zinc prescriptions (out of total ORS and zinc prescriptions)        | 188 (5%)                   | 73 (5%)                     | 261 (5%)         |

|                                                                                                               |              |             |              |
|---------------------------------------------------------------------------------------------------------------|--------------|-------------|--------------|
| Patients with danger signs appropriately referred to health center                                            | 137 (80%)    | 40 (69%)    | 177 (77%)    |
| Patients with danger signs receiving appropriate pre-referral treatment                                       | 96 (56%)     | 42 (72%)    | 138 (60%)    |
| Patients receiving overall correct management (all months)*                                                   | 10,455 (77%) | 3,244 (68%) | 13,699 (74%) |
| Patients receiving overall correct management (July 2016 - December 2018)                                     | 5,560 (75%)  | 3,244 (68%) | 8,804 (72%)  |
| Patients receiving overall correct management, excluding referral of patients with negative RDT (all months)* | 11,486 (84%) | 3,654 (76%) | 15,140 (82%) |

Abbreviations: ACT, artemisinin combination therapy; ORS, oral rehydration solution; RDT, rapid diagnostic test for malaria; VHW, village health worker

\*April 2014 - December 2018 for original VHWs; July 2016 - December 2018 for expansion VHWs

Overall, 74% of patients received correct management (77% vs. 68%). When comparing only the time period in which the second cohort of VHWs was providing iCCM care, 72% of patients received correct management (75% vs 68%). Excluding the common error of failing to refer patients with a negative malaria RDT, 82% of patients received correct management (84% vs 76%).

Inappropriate use of medications was fairly low, with 2% of patients receiving ACT inappropriately, 3% of patients receiving amoxicillin inappropriately, and 1% of patients receiving ORS, zinc, or both inappropriately (Table 2). This constituted 3%, 7%, and 5% of prescriptions for those medications, respectively. These proportions were similar between the two cohorts of VHWs.

Regarding individual VHWs' performance, of the 38 VHWs, all 38 VHWs provided correct care for at least 70% of patients with malaria, and 34 VHWs provided correct care for least 84% of patients with malaria, compared with 35 and 30 VHWs (respectively) for patients with presumed pneumonia, 36 and 29 VHWs (respectively) for patients with diarrhea, and 24 and 7 VHWs (respectively) for all patients. If failure to refer patients with a negative RDT is excluded, then 35 VHWs met the 70% threshold for overall correct care, and 16 VHWs met the 84% threshold for overall correct care (Table 3).

Table 3: Village health worker-level quality of care measures

| Measure                                            | In >70% of encounters<br>n (%)* | In >84% of encounters<br>n (%)* |
|----------------------------------------------------|---------------------------------|---------------------------------|
| VHWs providing correct care for malaria            | 38 (100%)                       | 34 (89%)                        |
| VHWs providing correct care for presumed pneumonia | 35 (92%)                        | 30 (79%)                        |
| VHWs providing correct care for diarrhea           | 36 (95%)                        | 29 (76%)                        |

|                                                                                       |          |          |
|---------------------------------------------------------------------------------------|----------|----------|
| VHWs providing overall correct care                                                   | 24 (63%) | 7 (18%)  |
| VHWs providing overall correct care, excluding referral of patients with negative RDT | 35 (92%) | 16 (42%) |

Abbreviations: RDT, rapid diagnostic test for malaria; VHW, village health worker

\*The 70% and 84% thresholds were chosen to accord with our prior lot quality assurance sampling approach, allowing for comparison between the two studies

Graphical depiction of overall correct care over time for the first cohort of VHWs appeared to show a gradual increase until approximately March 2016 (3 years after iCCM care initiation), followed by gradual decrease (Figure 1). Modelling time as a continuous variable (months since iCCM care initiation) estimated a 0.6% decreased odds of correct care for each month (OR 0.994, 95% CI 0.988-0.999,  $p=0.032$ ). The addition of a spline knot at the 3-year mark demonstrated a slight trend toward increasing correctness of care up until the 3-year mark (OR 1.022, 95% CI 1.005-1.038,  $p=0.009$ ), followed by decreasing correctness of care after that point (OR 0.978, 95% CI 0.970-0.986,  $p<0.001$ ), with an improvement in model fit based on the QIC values (Table 4).

Table 4: GEE logistic regression models for quality of care over time

| Measure                                                                                                                                                   | OR    | 95% CI      | p-value | Model QIC* |
|-----------------------------------------------------------------------------------------------------------------------------------------------------------|-------|-------------|---------|------------|
| <i>First cohort VHWs, overall correct care**</i>                                                                                                          |       |             |         | 14587      |
| Months since iCCM services initiation                                                                                                                     | 0.994 | 0.988–0.999 | 0.032   |            |
| <i>First cohort VHWs, overall correct care, with spline knot at 3 years after iCCM care initiation**</i>                                                  |       |             |         | 14524      |
| Months since iCCM services initiation - Months 14–36                                                                                                      | 1.022 | 1.005–1.038 | 0.009   |            |
| Months since iCCM services initiation - Months 36–70                                                                                                      | 0.978 | 0.970–0.986 | <0.001  |            |
| <i>First cohort VHWs, overall correct care excluding referral of patients with negative RDT**</i>                                                         |       |             |         | 11747      |
| Months since iCCM services initiation                                                                                                                     | 0.999 | 0.993–1.004 | 0.632   |            |
| <i>First cohort VHWs, overall correct care excluding referral of patients with negative RDT, with spline knot at 3 years after iCCM care initiation**</i> |       |             |         | 11718      |
| Months since iCCM services initiation - Months 14–36                                                                                                      | 1.023 | 1.005–1.043 | 0.015   |            |
| Months since iCCM services initiation - Months 36–70                                                                                                      | 0.984 | 0.976–0.993 | <0.001  |            |
| <i>Second cohort VHWs, overall correct care</i>                                                                                                           |       |             |         | 6057       |
| Months since iCCM services initiation                                                                                                                     | 1.007 | 0.989–1.025 | 0.475   |            |
| <i>Second cohort VHWs, overall correct care, with spline knot at 6 months after iCCM care initiation</i>                                                  |       |             |         | 6061       |
| Months since iCCM services initiation - Months 1–6                                                                                                        | 1.068 | 0.971–1.175 | 0.175   |            |
| Months since iCCM services initiation - Months 7–30                                                                                                       | 0.998 | 0.973–1.022 | 0.845   |            |
| <i>Second cohort VHWs, overall correct care, with spline knot at 18 months after iCCM care initiation</i>                                                 |       |             |         | 6047       |
| Months since iCCM services initiation - Months 1–18                                                                                                       | 1.027 | 1.004–1.050 | 0.023   |            |
| Months since iCCM services initiation - Months 19–30                                                                                                      | 0.963 | 0.926–1.000 | 0.053   |            |

|                                                                                                  |       |             |       |
|--------------------------------------------------------------------------------------------------|-------|-------------|-------|
| <i>Second cohort VHWs, overall correct care excluding referral of patients with negative RDT</i> |       |             | 5272  |
| Months since iCCM services initiation                                                            | 1.026 | 1.007–1.045 | 0.006 |

Abbreviations: CI, confidence interval; iCCM, Integrated Community Case Management; OR, odds ratio; QIC, quasi-likelihood under the independence model criterion; RDT, rapid diagnostic test for malaria; VHW, village health worker

\*Quasi-likelihood under the independence model criterion. This is a modification of the Akaike information criterion (AIC) so that it can be applied to GEE regression models to assess goodness of fit of different models. A lower QIC term reflects a better-fitting regression model.

\*\*One VHW joined the first cohort of VHWs later, and is thus excluded from this analysis

Graphical depiction of correct referral of patients with a negative RDT for the first cohort of VHWs appeared to show worse performance over time; exclusion of this error appeared to moderate the trend toward decreasing quality of care in later months (Figure 1). Repeating the model with the outcome variable as correct care excluding referral of patients with negative RDT estimated essentially constant correctness of care over time (OR 0.999, 95% CI 0.993–1.004,  $p=0.632$ ). The addition of a spline knot at the 3-year mark resulted in similar findings to using the main outcome variable of overall correct care (slightly increasing correctness of care up until the 3-year mark, followed by slightly decreasing correctness of care); see Table 4 and Figure 2.

Graphical depiction of overall correct care over time for the second cohort of VHWs appeared to show a slight increase in correct care over approximately the first 6 months after iCCM program initiation, followed by a plateau and then a further increase until approximately 18 months, followed by a gradual decline (Figure 1). Modelling time as a continuous variable estimated essentially constant correctness of care over time (OR 1.007, 95% CI 0.989, 1.025,  $p=0.475$ ); see Table 4. Based on the graphical appearance as well as our prior findings [8], we created two additional models, one with a spline knot at 6 months, and one with a spline knot at 18 months. The model with the spline knot at 6 months did not meaningfully change the result (months 1-6: OR 1.068, 95% CI 0.971–1.175,  $p=0.175$ ; months 7-30: OR 0.998, 95% CI 0.973–1.022,  $p=0.845$ ). The model with the spline knot at 18 months showed some evidence of a trend toward increasing correctness of care over the first 18 months and decreasing correctness of care over the remaining 12 months (months 1-18: OR 1.027, 95% CI 1.004–1.050,  $p=0.023$ ; months 18-30: OR 0.963, 95% CI 0.926–1.000,  $p=0.053$ ), with an improvement in model fit based on the QIC values (Table 4).

Similar to the first cohort, graphical depiction of correct referral of patients with a negative RDT by VHWs in the second cohort appeared to show worse performance over time; exclusion of this error resulted in a relatively linear-appearing trend toward increasing correctness of care over time, followed by a slight decline over the final 6 months (Figure 1). Repeating the model with the outcome variable as correct care excluding referral of patients with negative RDT demonstrated a trend toward increasing correctness of care over time (OR 1.026, 95% CI 1.007–1.045,  $p=0.006$ ); see Table 4.

## DISCUSSION

1  
2  
3 Patient demographic data and presenting complaints were broadly similar between patients  
4 treated by the two cohorts of VHWs. Overall quality of care was slightly higher for the first  
5 cohort of VHWs compared with the second cohort (77% vs 68%). Both cohorts demonstrated  
6 high quality of care for uncomplicated malaria, pneumonia, and diarrhea (>90% on all measures  
7 for the first cohort, and >85% for all measures for the second cohort). Encouragingly, overuse of  
8 medications was fairly low in both cohorts as well. To the best of our knowledge, the program  
9 never experienced stockouts of medications, so VHWs' ability to provide correct care would not  
10 have been affected by unavailability of the necessary medication.  
11  
12  
13

14 These findings are broadly similar to our prior evaluation of quality of care in Bugoye as well as  
15 other studies in Uganda[4–6,8]. Studies on iCCM care in other countries in Sub-Saharan Africa  
16 have demonstrated greater heterogeneity. Some have documented correct care for 70–90% of  
17 encounters[9,17–19]. Others have documented lower quality of care overall[10,20] or in the  
18 control group or pre-assessment evaluation in several intervention studies[21,22].  
19  
20  
21

22 In both cohorts, the proportion of patients with fever and negative RDT for malaria  
23 appropriately referred to the health center was quite low. Our prior evaluation identified this  
24 common error as well[8], which prompted refresher training on this topic. The persistence of  
25 this error despite refresher training might indicate that this represents an intentional decision  
26 by VHWs rather than an unintentional error; perhaps VHWs have observed that such patients  
27 often have self-limiting viral illnesses and recover without intervention. Some iCCM programs  
28 advise symptomatic management and at-home follow-up rather than referral for patients with  
29 subjective fever and a negative malaria RDT[15]. When this error is excluded, overall quality of  
30 care for all other patients was 84% and 76% in the first and second cohorts respectively.  
31  
32  
33

34 VHWs did not perform as well for appropriate referral and pre-referral treatment of patients  
35 with danger signs. This finding is somewhat concerning as these patients are likely at highest  
36 risk of poor outcomes or even death. Very few deaths were reported, though deaths might be  
37 underreported as VHWs might not update their clinical encounter record if a child later dies  
38 during that illness episode. Additionally, deaths may have occurred in children who were never  
39 evaluated by a VHW.  
40  
41  
42

43 The analytic results of this study for the first cohort of VHWs showed a modest increase in  
44 quality of care until approximately 3 years after their initial iCCM training, followed by a gradual  
45 decrease in quality of care. While the magnitude of change is small, the trend toward  
46 decreasing quality of care in the later years requires further monitoring. Uganda relies on an all-  
47 volunteer VHWs workforce, which could result in decreased motivation over time.  
48 Alternatively, as VHWs gain experience and are further from their initial training, they may  
49 begin to rely more on clinical judgment and follow the iCCM protocol less closely.  
50  
51  
52

53 For the second cohort of VHWs, quality of care was essentially constant over time. This finding  
54 is in contrast to our prior study demonstrating increasing quality of care over the first 6 months  
55 in the first cohort of VHWs[8]. When referral of patients with a negative RDT was excluded,  
56 quality of care for the second cohort appeared to gradually improve over time.  
57  
58  
59  
60



1  
2  
3  
4 This study has at least 5 limitations. First, while we conducted some data cleaning and assessed  
5 for duplicate entries as detailed above, these data were not double-entered. Given the large  
6 volume of clinical encounters, some data entry errors likely persist. However, such errors are  
7 less likely to cause systematic bias. Second, some elements of correct care are not captured on  
8 the paper registers, and thus cannot be assessed here (e.g., correct drug dosages), which may  
9 overestimate quality of care. Third, this study assesses quality of recorded care rather than  
10 quality of actual care. In some instances, this may overestimate quality of care—e.g., we cannot  
11 assess whether a VHW correctly performed and read a malaria RDT or measured respiratory  
12 rate correctly. In other cases, a VHW could provide correct care but have the encounter  
13 classified as incorrect due to incomplete record-keeping. For instance, because the words for  
14 “fever” and “malaria” are often used interchangeably in the local language, some VHWs seem  
15 to have recorded a patient as having subjective fever only if the malaria RDT was positive. For a  
16 patient with a negative RDT, this misunderstanding would make it appear that the VHW had  
17 incorrectly performed an RDT for a patient without subjective fever. Overall however, prior  
18 research suggests that record review somewhat overestimates quality of care when compared  
19 with direct observation of VHWs with reexamination by a clinician[23,24]. Fourth, because the  
20 data are deidentified and lack a reliable unique identifier variable, two or more illness episodes  
21 for the same child may be included. However, this issue is unlikely to affect the results  
22 significantly, as quality of care for different episodes of illness for a given individual are not  
23 necessarily correlated (beyond the addressed correlation of receiving care from the same  
24 VHW). Fifth, while this study assesses a large number of patient encounters, it includes a fairly  
25 small number of VHWs in a single geographic area, limiting its generalizability.  
26  
27  
28  
29  
30  
31

## 32 **CONCLUSION**

33 Overall, this study suggests that VHWs continue to provide high quality of care for  
34 uncomplicated malaria, pneumonia, and diarrhea nearly 5 years after initial training, with lower  
35 quality of care for patients with danger signs. Further qualitative evaluation may help elucidate  
36 why VHWs persistently fail to refer patients with subjective fever and a negative malaria RDT.  
37 To the best of our knowledge, this is the first study to track overall quality of care over an  
38 extended timeframe. The modest trend toward decreasing quality of care after 3 years of  
39 providing iCCM care in the first cohort of VHWs requires further monitoring.  
40  
41  
42  
43  
44

## 45 **List of abbreviations**

46 ACT: artemisinin combination therapy; GEE: generalized estimating equations; iCCM:  
47 Integrated Community Case Management; ORS: oral rehydration solution; QIC: quasi-  
48 likelihood under the independence criterion; RDT: rapid diagnostic test for malaria; VHW:  
49 village health worker  
50

## 51 **Acknowledgments:**

52 We are grateful to Sarah Masika, Rapheal Mbusa, Stephen Baguma, Sara Mian-McCarthy, and  
53 Emily Cable for their work in administering and supporting the village health worker program in  
54  
55  
56  
57  
58  
59  
60

1  
2  
3 Bugoye. We are grateful to all the village health workers for volunteering to provide critical  
4 services to their communities.  
5

6  
7 **Competing interests:** The authors declare that they have no competing interests  
8

9  
10 **Funding:** This work was supported by the Mooney-Reed Charitable Foundation (Award/Grant  
11 number is not applicable) and the Massachusetts General Hospital Department of Medicine  
12 (Award/Grant number is not applicable).  
13

14  
15 **Ethical review:** Ethical approval for this study was granted by the Partners Healthcare IRB  
16 (2016P001423) and the Research Ethics Committee at the Mbarara University of Science and  
17 Technology (14/06-16). Because the study involved only analysis of deidentified clinical records,  
18 individual patients' caregivers were not consented for the study.  
19

20  
21 **Authors' contributions:** JSM, EMM, JK, RR, and GSS conceived and designed the study. ACW  
22 and EMM led data collection, with contributions from NM, JM, MM, MN, DAG, PRP, SB, and  
23 JSM. JSM led data analysis, with contributions from ACW and EMM. JSM and EMM drafted  
24 initial versions of the manuscript. All authors contributed to manuscript writing and approved  
25 the final manuscript.  
26

27  
28 **Data sharing statement:** Data are available for non-commercial use from the corresponding  
29 author (jsmiller@post.harvard.edu) upon reasonable request.  
30

## 31 **References**

- 32  
33  
34 1 Republic of Uganda Ministry of Health. Village Health Team Strategy and Operational  
35 Guidelines. 2010. [http://library.health.go.ug/publications/health-education/village-health-](http://library.health.go.ug/publications/health-education/village-health-team-strategy-and-operational-guidelines)  
36 [team-strategy-and-operational-guidelines](http://library.health.go.ug/publications/health-education/village-health-team-strategy-and-operational-guidelines) (accessed 12 Sep 2020).  
37
- 38  
39 2 Republic of Uganda Ministry of Health. National Village Health Teams (VHT) assessment in  
40 Uganda. 2015. [http://library.health.go.ug/publications/health-education/national-village-](http://library.health.go.ug/publications/health-education/national-village-health-teamsvht-assessment-uganda)  
41 [health-teamsvht-assessment-uganda](http://library.health.go.ug/publications/health-education/national-village-health-teamsvht-assessment-uganda) (accessed 12 Sep 2020).  
42
- 43  
44 3 The Republic of Uganda Ministry of Health. Integrated Community Case Management of  
45 Childhood Malaria, Pneumonia and Diarrhoea: Implementation Guidelines.  
46 2010.[http://library.health.go.ug/publications/child-health-school-health/integrated-](http://library.health.go.ug/publications/child-health-school-health/integrated-community-case-management-childhood-malaria)  
47 [community-case-management-childhood-malaria](http://library.health.go.ug/publications/child-health-school-health/integrated-community-case-management-childhood-malaria) (accessed 25 Jul 2020).  
48
- 49  
50 4 Mukanga D, Babirye R, Peterson S, *et al*. Can lay community health workers be trained to  
51 use diagnostics to distinguish and treat malaria and pneumonia in children? Lessons from  
52 rural Uganda. *Trop Med Int Health* 2011;**16**:1234–42. doi:10.1111/j.1365-  
53 3156.2011.02831.x  
54  
55  
56  
57  
58  
59  
60



- 5 Awor P, Wamani H, Tylleskar T, *et al.* Drug seller adherence to clinical protocols with integrated management of malaria, pneumonia and diarrhoea at drug shops in Uganda. *Malar J* 2015;**14**:277. doi:10.1186/s12936-015-0798-9
- 6 Soremekun S, Kasteng F, Lingam R, *et al.* Variation in the quality and out-of-pocket cost of treatment for childhood malaria, diarrhoea, and pneumonia: Community and facility based care in rural Uganda. *PLoS One* 2018;**13**:e0200543. doi:10.1371/journal.pone.0200543
- 7 Kelly JM, Osamba B, Garg RM, *et al.* Community health worker performance in the management of multiple childhood illnesses: Siaya District, Kenya, 1997-2001. *Am J Public Health* 2001;**91**:1617–24.
- 8 Miller JS, English L, Matte M, *et al.* Quality of care in integrated community case management services in Bugoye, Uganda: a retrospective observational study. *Malar J* 2018;**17**:99. doi:10.1186/s12936-018-2241-5
- 9 Baynes C, Mboya D, Likasi S, *et al.* Quality of Sick Child-Care Delivered by Community Health Workers in Tanzania. *Int J Health Policy Manag* 2018;**7**:1097–109. doi:10.15171/ijhpm.2018.63
- 10 Gilroy KE, Callaghan-Koru JA, Cardemil CV, *et al.* Quality of sick child care delivered by Health Surveillance Assistants in Malawi. *Health Policy Plan* 2013;**28**:573–85. doi:10.1093/heapol/czs095
- 11 Counihan H, Harvey SA, Sekeseke-Chinyama M, *et al.* Community health workers use malaria rapid diagnostic tests (RDTs) safely and accurately: results of a longitudinal study in Zambia. *Am J Trop Med Hyg* 2012;**87**:57–63. doi:10.4269/ajtmh.2012.11-0800
- 12 Boyce MR, Menya D, Turner EL, *et al.* Evaluation of malaria rapid diagnostic test (RDT) use by community health workers: a longitudinal study in western Kenya. *Malar J* 2018;**17**:206. doi:10.1186/s12936-018-2358-6
- 13 Miller JS, Mbusa RK, Baguma S, *et al.* Assessing Village Health Workers' Ability to Perform and Interpret Rapid Diagnostic Tests for Malaria 4 Years after Initial Training: A Cross-Sectional Study. *Am J Trop Med Hyg* Published Online First: 2 November 2020. doi:10.4269/ajtmh.20-0747
- 14 Christiansen TB; Lauritsen JM. *EpiData - Comprehensive Data Management and Basic Statistical Analysis System, Version 3*. Odense Denmark: : EpiData Association <http://www.epidata.dk>
- 15 Hamer DH, Brooks ET, Semrau K, *et al.* Quality and safety of integrated community case management of malaria using rapid diagnostic tests and pneumonia by community health workers. *Pathog Glob Health* 2012;**106**:32–9. doi:10.1179/1364859411y.0000000042

- 16 Miller JS, Patel P, Mian-McCarthy S, *et al.* Usage of and satisfaction with Integrated Community Case Management care in western Uganda: a cross-sectional survey. *Malar J* 2021;**20**:65. doi:10.1186/s12936-021-03601-9
- 17 Sinyangwe C, Graham K, Nicholas S, *et al.* Assessing the Quality of Care for Pneumonia in Integrated Community Case Management: A Cross-Sectional Mixed Methods Study. *PLoS One* 2016;**11**:e0152204. doi:10.1371/journal.pone.0152204
- 18 Zakus D, Moussa M, Ezechiel M, *et al.* Clinical evaluation of the use of an mhealth intervention on quality of care provided by Community Health Workers in southwest Niger. *J Glob Health* 2019;**9**:010812. doi:10.7189/jogh.09.010812
- 19 Graham K, Sinyangwe C, Nicholas S, *et al.* Rational use of antibiotics by community health workers and caregivers for children with suspected pneumonia in Zambia: a cross-sectional mixed methods study. *BMC Public Health* 2016;**16**:897. doi:10.1186/s12889-016-3541-8
- 20 Munos M, Guiella G, Robertson T, *et al.* Independent Evaluation of the Rapid Scale-Up Program to Reduce Under-Five Mortality in Burkina Faso. *Am J Trop Med Hyg* Published Online First: 19 January 2016. doi:10.4269/ajtmh.15-0585
- 21 Langston A, Wittcoff A, Ngoy P, *et al.* Testing a simplified tool and training package to improve integrated Community Case Management in Tanganyika Province, Democratic Republic of Congo: a quasi-experimental study. *J Glob Health* 2019;**9**:010810. doi:10.7189/jogh.09.010810
- 22 Boyce SP, Nyangara F, Kamunyori J. A mixed-methods quasi-experimental evaluation of a mobile health application and quality of care in the integrated community case management program in Malawi. *J Glob Health* 2019;**9**:010811. doi:10.7189/jogh.09.010811
- 23 Cardemil CV, Gilroy KE, Callaghan-Koru JA, *et al.* Comparison of methods for assessing quality of care for community case management of sick children: an application with community health workers in Malawi. *Am J Trop Med Hyg* 2012;**87**:127–36. doi:10.4269/ajtmh.2012.12-0389
- 24 Miller NP, Amouzou A, Hazel E, *et al.* Assessing the Quality of Sick Child Care Provided by Community Health Workers. *PLoS One* 2015;**10**:e0142010. doi:10.1371/journal.pone.0142010

**Figure 1:** Lowess smoothing plots for correct management over time. Plots A–C correspond to the first cohort of VHVs. Plot A shows overall correct care over time. Plot B shows correct referral of patients with a negative malaria RDT over time. Plot C shows overall correct care over time, excluding the error of failing to refer patients with a negative malaria RDT. Plots D–F depict the second cohort of VHVs. Plot D shows overall correct care over time. Plot E correct

1  
2  
3 referral of patients with a negative malaria RDT over time. Plot F shows overall correct care  
4 over time, excluding the error of failing to refer patients with a negative malaria RDT.  
5  
6

7 **Figure 2:** Post-estimation margins plots for GEE logistic regression models with spline knots.  
8 Plots A and B depict the first cohort of VHWs. Plot A shows overall correct care over time, with  
9 a spline knot 3 years after iCCM care initiation for this group. Plot B shows overall correct care  
10 over time, excluding the error of failing to refer patients with a negative malaria RDT, again  
11 with a spline knot at 3 years. Plots C and D depict the second cohort of VHWs. Plot C shows  
12 overall correct care over time, with a spline knot 6 months after iCCM care initiation for this  
13 group. Plot D again shows overall correct care over time, but with a spline knot at 18 months.  
14  
15  
16  
17  
18  
19  
20  
21  
22  
23  
24  
25  
26  
27  
28  
29  
30  
31  
32  
33  
34  
35  
36  
37  
38  
39  
40  
41  
42  
43  
44  
45  
46  
47  
48  
49  
50  
51  
52  
53  
54  
55  
56  
57  
58  
59  
60

1  
2  
3  
4  
5  
6  
7  
8  
9  
10  
11  
12  
13  
14  
15  
16  
17  
18  
19  
20  
21  
22  
23  
24  
25  
26  
27  
28  
29  
30  
31  
32  
33  
34  
35  
36  
37  
38  
39  
40  
41  
42  
43  
44  
45  
46  
47  
48  
49  
50  
51  
52  
53  
54  
55  
56  
57  
58  
59  
60

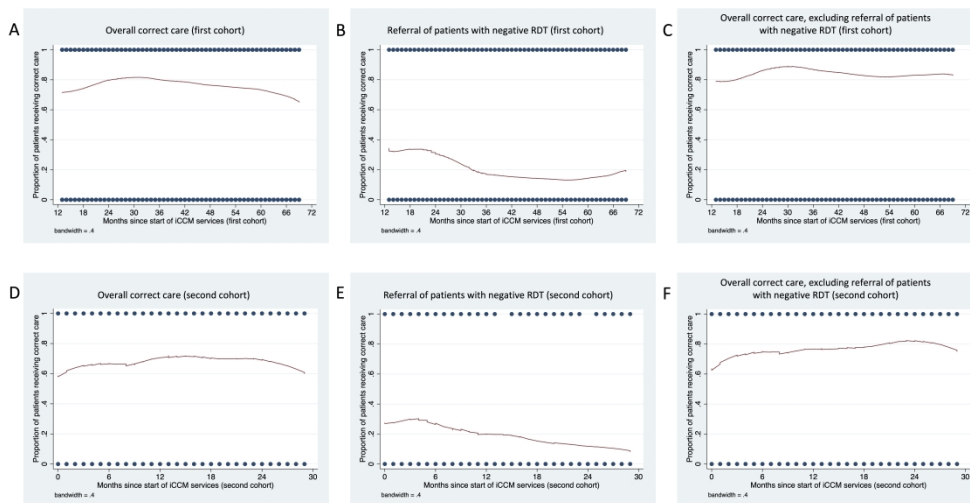

338x190mm (600 x 600 DPI)

1  
2  
3  
4  
5  
6  
7  
8  
9  
10  
11  
12  
13  
14  
15  
16  
17  
18  
19  
20  
21  
22  
23  
24  
25  
26  
27  
28  
29  
30  
31  
32  
33  
34  
35  
36  
37  
38  
39  
40  
41  
42  
43  
44  
45  
46  
47  
48  
49  
50  
51  
52  
53  
54  
55  
56  
57  
58  
59  
60

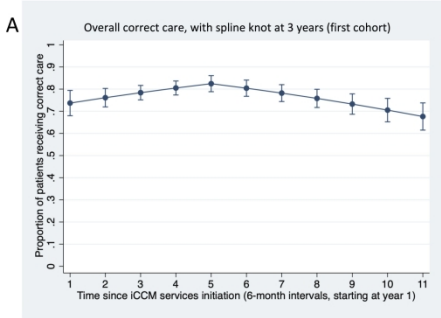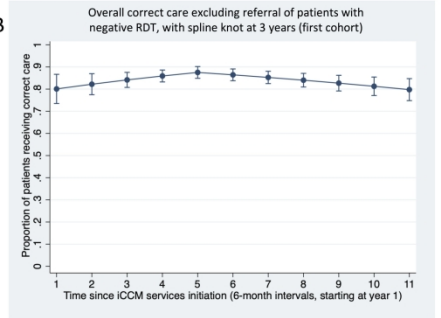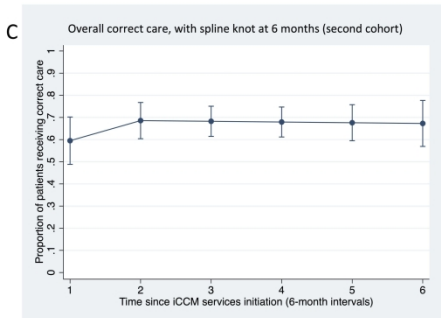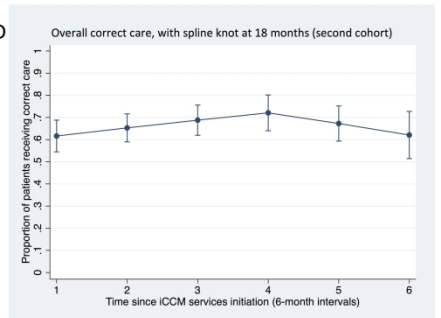

281x190mm (600 x 600 DPI)

STROBE Statement—Checklist of items that should be included in reports of *cohort studies*

|                              | Item No | Recommendation                                                                                                                                                                                                                                                                                                         | Page No |
|------------------------------|---------|------------------------------------------------------------------------------------------------------------------------------------------------------------------------------------------------------------------------------------------------------------------------------------------------------------------------|---------|
| <b>Title and abstract</b>    | 1       | (a) Indicate the study's design with a commonly used term in the title or the abstract<br>(b) Provide in the abstract an informative and balanced summary of what was done and what was found                                                                                                                          | 1       |
| <b>Introduction</b>          |         |                                                                                                                                                                                                                                                                                                                        |         |
| Background/rationale         | 2       | Explain the scientific background and rationale for the investigation being reported                                                                                                                                                                                                                                   | 3-4     |
| Objectives                   | 3       | State specific objectives, including any prespecified hypotheses                                                                                                                                                                                                                                                       | 4       |
| <b>Methods</b>               |         |                                                                                                                                                                                                                                                                                                                        |         |
| Study design                 | 4       | Present key elements of study design early in the paper                                                                                                                                                                                                                                                                | 4       |
| Setting                      | 5       | Describe the setting, locations, and relevant dates, including periods of recruitment, exposure, follow-up, and data collection                                                                                                                                                                                        | 4       |
| Participants                 | 6       | (a) Give the eligibility criteria, and the sources and methods of selection of participants. Describe methods of follow-up<br>(b) For matched studies, give matching criteria and number of exposed and unexposed                                                                                                      | 4       |
| Variables                    | 7       | Clearly define all outcomes, exposures, predictors, potential confounders, and effect modifiers. Give diagnostic criteria, if applicable                                                                                                                                                                               | 5       |
| Data sources/<br>measurement | 8*      | For each variable of interest, give sources of data and details of methods of assessment (measurement). Describe comparability of assessment methods if there is more than one group                                                                                                                                   | 5-6     |
| Bias                         | 9       | Describe any efforts to address potential sources of bias                                                                                                                                                                                                                                                              | 5       |
| Study size                   | 10      | Explain how the study size was arrived at                                                                                                                                                                                                                                                                              | n/a     |
| Quantitative variables       | 11      | Explain how quantitative variables were handled in the analyses. If applicable, describe which groupings were chosen and why                                                                                                                                                                                           | n/a     |
| Statistical methods          | 12      | (a) Describe all statistical methods, including those used to control for confounding<br>(b) Describe any methods used to examine subgroups and interactions<br>(c) Explain how missing data were addressed<br>(d) If applicable, explain how loss to follow-up was addressed<br>(e) Describe any sensitivity analyses | 5       |
| <b>Results</b>               |         |                                                                                                                                                                                                                                                                                                                        |         |
| Participants                 | 13*     | (a) Report numbers of individuals at each stage of study—eg numbers potentially eligible, examined for eligibility, confirmed eligible, included in the study, completing follow-up, and analysed<br>(b) Give reasons for non-participation at each stage<br>(c) Consider use of a flow diagram                        | 6       |
| Descriptive data             | 14*     | (a) Give characteristics of study participants (eg demographic, clinical, social) and information on exposures and potential confounders<br>(b) Indicate number of participants with missing data for each variable of interest<br>(c) Summarise follow-up time (eg, average and total amount)                         | 6       |
| Outcome data                 | 15*     | Report numbers of outcome events or summary measures over time                                                                                                                                                                                                                                                         | 6-7     |

|    |                          |                                                                                                                  |                                                                                                                                                                                                              |      |
|----|--------------------------|------------------------------------------------------------------------------------------------------------------|--------------------------------------------------------------------------------------------------------------------------------------------------------------------------------------------------------------|------|
| 1  | Main results             | 16                                                                                                               | (a) Give unadjusted estimates and, if applicable, confounder-adjusted estimates and their precision (eg, 95% confidence interval). Make clear which confounders were adjusted for and why they were included | 9-10 |
| 2  |                          | (b) Report category boundaries when continuous variables were categorized                                        |                                                                                                                                                                                                              |      |
| 3  |                          | (c) If relevant, consider translating estimates of relative risk into absolute risk for a meaningful time period |                                                                                                                                                                                                              |      |
| 4  | Other analyses           | 17                                                                                                               | Report other analyses done—eg analyses of subgroups and interactions, and sensitivity analyses                                                                                                               | 9-10 |
| 5  | <b>Discussion</b>        |                                                                                                                  |                                                                                                                                                                                                              |      |
| 6  | Key results              | 18                                                                                                               | Summarise key results with reference to study objectives                                                                                                                                                     | 11   |
| 7  | Limitations              | 19                                                                                                               | Discuss limitations of the study, taking into account sources of potential bias or imprecision. Discuss both direction and magnitude of any potential bias                                                   | 12   |
| 8  | Interpretation           | 20                                                                                                               | Give a cautious overall interpretation of results considering objectives, limitations, multiplicity of analyses, results from similar studies, and other relevant evidence                                   | 12   |
| 9  | Generalisability         | 21                                                                                                               | Discuss the generalisability (external validity) of the study results                                                                                                                                        | 11   |
| 10 | <b>Other information</b> |                                                                                                                  |                                                                                                                                                                                                              |      |
| 11 | Funding                  | 22                                                                                                               | Give the source of funding and the role of the funders for the present study and, if applicable, for the original study on which the present article is based                                                | 13   |

\*Give information separately for exposed and unexposed groups.

**Note:** An Explanation and Elaboration article discusses each checklist item and gives methodological background and published examples of transparent reporting. The STROBE checklist is best used in conjunction with this article (freely available on the Web sites of PLoS Medicine at <http://www.plosmedicine.org/>, Annals of Internal Medicine at <http://www.annals.org/>, and Epidemiology at <http://www.epidem.com/>). Information on the STROBE Initiative is available at <http://www.strobe-statement.org>.

# BMJ Open

## Long-term quality of Integrated Community Case Management care for children in Bugoye Subcounty, Uganda: a retrospective observational study

|                                 |                                                                                                                                                                                                                                                                                                                                                                                                                                                                                                                                                                                                                                                                                                                                                                                                                                                                                                                                                                                                                                                                                                                                                                                                                                                                                                                                  |
|---------------------------------|----------------------------------------------------------------------------------------------------------------------------------------------------------------------------------------------------------------------------------------------------------------------------------------------------------------------------------------------------------------------------------------------------------------------------------------------------------------------------------------------------------------------------------------------------------------------------------------------------------------------------------------------------------------------------------------------------------------------------------------------------------------------------------------------------------------------------------------------------------------------------------------------------------------------------------------------------------------------------------------------------------------------------------------------------------------------------------------------------------------------------------------------------------------------------------------------------------------------------------------------------------------------------------------------------------------------------------|
| Journal:                        | <i>BMJ Open</i>                                                                                                                                                                                                                                                                                                                                                                                                                                                                                                                                                                                                                                                                                                                                                                                                                                                                                                                                                                                                                                                                                                                                                                                                                                                                                                                  |
| Manuscript ID                   | bmjopen-2021-051015.R1                                                                                                                                                                                                                                                                                                                                                                                                                                                                                                                                                                                                                                                                                                                                                                                                                                                                                                                                                                                                                                                                                                                                                                                                                                                                                                           |
| Article Type:                   | Original research                                                                                                                                                                                                                                                                                                                                                                                                                                                                                                                                                                                                                                                                                                                                                                                                                                                                                                                                                                                                                                                                                                                                                                                                                                                                                                                |
| Date Submitted by the Author:   | 17-Nov-2021                                                                                                                                                                                                                                                                                                                                                                                                                                                                                                                                                                                                                                                                                                                                                                                                                                                                                                                                                                                                                                                                                                                                                                                                                                                                                                                      |
| Complete List of Authors:       | Miller, James S.; Massachusetts General Hospital; Harvard Medical School<br>Mulogo, Edgar; Mbarara University of Science and Technology Faculty of Medicine, Community health; Bugoye Community Health Collaboration<br>Wesuta, Andrew ; Bugoye Community Health Collaboration ; Global Health Collaborative—MUST Uganda<br>Mumbere, Nobert; Bugoye Community Health Collaboration ; Global Health Collaborative—MUST Uganda<br>Mbaju, Jackson; Bugoye Community Health Collaboration ; Global Health Collaborative—MUST Uganda<br>Matte, Michael; Bugoye Community Health Collaboration ; Global Health Collaborative—MUST Uganda<br>Ntaro, Moses; Mbarara University of Science and Technology Faculty of Medicine, Community health; Bugoye Community Health Collaboration<br>Guiles, Daniel; Indiana University School of Medicine<br>Patel, Palka; Indiana University School of Medicine<br>Bwambale, Shem; Bugoye Health Center; Bugoye Community Health Collaboration<br>Kenney, Jessica; Massachusetts General Hospital; Bugoye Community Health Collaboration<br>Reyes, Raquel ; University of North Carolina at Chapel Hill, 5039 Old Clinic Building, CB 7110, Chapel Hill, 27599, USA., Division of General Medicine & Clinical Epidemiology<br>Stone, Geren; Massachusetts General Hospital; Harvard Medical School |
| <b>Primary Subject Heading</b>: | Global health                                                                                                                                                                                                                                                                                                                                                                                                                                                                                                                                                                                                                                                                                                                                                                                                                                                                                                                                                                                                                                                                                                                                                                                                                                                                                                                    |
| Secondary Subject Heading:      | Health services research, Infectious diseases                                                                                                                                                                                                                                                                                                                                                                                                                                                                                                                                                                                                                                                                                                                                                                                                                                                                                                                                                                                                                                                                                                                                                                                                                                                                                    |
| Keywords:                       | Quality in health care < HEALTH SERVICES ADMINISTRATION & MANAGEMENT, Tropical medicine < INFECTIOUS DISEASES, Community child health < PAEDIATRICS, PRIMARY CARE, Paediatric infectious disease & immunisation < PAEDIATRICS                                                                                                                                                                                                                                                                                                                                                                                                                                                                                                                                                                                                                                                                                                                                                                                                                                                                                                                                                                                                                                                                                                    |
|                                 |                                                                                                                                                                                                                                                                                                                                                                                                                                                                                                                                                                                                                                                                                                                                                                                                                                                                                                                                                                                                                                                                                                                                                                                                                                                                                                                                  |



1  
2  
3  
4  
5  
6  
7  
8  
9  
10  
11  
12  
13  
14  
15  
16  
17  
18  
19  
20  
21  
22  
23  
24  
25  
26  
27  
28  
29  
30  
31  
32  
33  
34  
35  
36  
37  
38  
39  
40  
41  
42  
43  
44  
45  
46  
47  
48  
49  
50  
51  
52  
53  
54  
55  
56  
57  
58  
59  
60

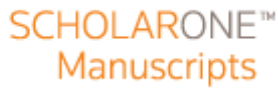



I, the Submitting Author has the right to grant and does grant on behalf of all authors of the Work (as defined in the below author licence), an exclusive licence and/or a non-exclusive licence for contributions from authors who are: i) UK Crown employees; ii) where BMJ has agreed a CC-BY licence shall apply, and/or iii) in accordance with the terms applicable for US Federal Government officers or employees acting as part of their official duties; on a worldwide, perpetual, irrevocable, royalty-free basis to BMJ Publishing Group Ltd ("BMJ") its licensees and where the relevant Journal is co-owned by BMJ to the co-owners of the Journal, to publish the Work in this journal and any other BMJ products and to exploit all rights, as set out in our [licence](#).

The Submitting Author accepts and understands that any supply made under these terms is made by BMJ to the Submitting Author unless you are acting as an employee on behalf of your employer or a postgraduate student of an affiliated institution which is paying any applicable article publishing charge ("APC") for Open Access articles. Where the Submitting Author wishes to make the Work available on an Open Access basis (and intends to pay the relevant APC), the terms of reuse of such Open Access shall be governed by a Creative Commons licence – details of these licences and which [Creative Commons](#) licence will apply to this Work are set out in our licence referred to above.

Other than as permitted in any relevant BMJ Author's Self Archiving Policies, I confirm this Work has not been accepted for publication elsewhere, is not being considered for publication elsewhere and does not duplicate material already published. I confirm all authors consent to publication of this Work and authorise the granting of this licence.

1  
2  
3 **Long-term quality of Integrated Community Case Management care for children in Bugoye**  
4 **Subcounty, Uganda: a retrospective observational study**  
5

6  
7 James S. Miller<sup>1,2\*</sup>, Edgar Mugema Mulogo<sup>3,4\*</sup>, Andrew Christopher Wesuta<sup>4,5</sup>, Nobert  
8 Mumbere<sup>4,5</sup>, Jackson Mbaju<sup>4,5</sup>, Michael Matte<sup>4,5</sup>, Moses Ntaro<sup>3,4</sup>, Daniel A. Guiles<sup>6</sup>, Palka R.  
9 Patel<sup>6</sup>, Shem Bwambale<sup>4,7</sup>, Jessica Kenney<sup>1,4</sup>, Raquel Reyes<sup>8</sup>, and Geren S. Stone<sup>1,2</sup>  
10

11  
12 \*These authors contributed equally to this work  
13

14 Corresponding author: James S. Miller, MGH Global Health, 125 Nashua Street, Suite 722,  
15 Boston, MA 02114, USA; jsmiller@post.harvard.edu  
16

17  
18 <sup>1</sup>Massachusetts General Hospital

19 <sup>2</sup>Harvard Medical School

20 <sup>3</sup>Mbarara University of Science and Technology

21 <sup>4</sup>Bugoye Community Health Collaboration

22 <sup>5</sup>Global Health Collaborative—MUST Uganda

23 <sup>6</sup>Indiana University School of Medicine

24 <sup>7</sup>Bugoye Health Center

25 <sup>8</sup>University of North Carolina School of Medicine  
26  
27  
28

29 **Word count:** 4362  
30

31 **Keywords:** Village health workers, Integrated Community Case Management, quality of health  
32 care, Uganda  
33  
34  
35  
36  
37  
38  
39  
40  
41  
42  
43  
44  
45  
46  
47  
48  
49  
50  
51  
52  
53  
54  
55  
56  
57  
58  
59  
60

## Abstract

**Objectives:** Integrated community case management (iCCM) of childhood illness in Uganda involves protocol-based care of malaria, pneumonia, and diarrhea for children under 5 years old. This study assessed volunteer village health workers' (VHW) ability to provide correct iCCM care according to the national protocol and change in their performance over time since initial training.

**Setting:** VHWs affiliated with the Ugandan national program provide community-based care in 8 villages in Bugoye Subcounty, a rural area in Kasese District. The first cohort of VHWs began providing iCCM care in March 2013, the second cohort in July 2016.

**Participants:** All children receiving iCCM care in 18,430 clinical encounters occurring between April 2014–December 2018.

**Primary and secondary outcome measures:** The descriptive primary outcome measure was the proportion of patients receiving overall correct care, defined as adherence to the iCCM protocol for the presenting condition (hereafter quality of care). The analytic primary outcome was change in the odds of receiving correct care over time, assessed using logistic regression models with generalized estimating equations. Secondary outcome measures included a set of binary measures of adherence to specific elements of the iCCM protocol. Pre-planned and final measures were the same.

**Results:** Overall, VHWs provided correct care in 74% of clinical encounters. For the first cohort of VHWs, regression modeling demonstrated a modest increase in quality of care until approximately 3 years after their initial iCCM training (OR 1.022 per month elapsed, 95% CI 1.005–1.038), followed by a modest decrease thereafter (OR 0.978 per month, 95% CI 0.970–0.986). For the second cohort, quality of care was essentially constant over time (OR 1.007 per month, 95% CI 0.989–1.025).

**Conclusions:** Quality of care was relatively constant over time, though the trend toward decreasing quality of care after 3 years of providing iCCM care requires further monitoring.

### Strengths and limitations of this study

- We used a record review approach to examine quality of care for all Integrated Community Case Management clinical encounters over a nearly 5-year period
- A retrospective record review approach cannot assess all aspects of appropriate care, and may overestimate quality of care
- While this study assessed a large number of patient encounters, it included a fairly small number of VHWs in a single geographic area, limiting its generalizability

## INTRODUCTION

In integrated community case management (iCCM) of childhood illness, village health workers (VHW) or other lay workers provide care for pediatric malaria, pneumonia, and diarrhea, usually in a community setting rather than at a health facility[1]. VHWs follow a defined protocol that directs specific diagnostic and therapeutic steps based on the patient's presenting complaint and clinical exam findings. In some parts of Uganda, volunteer VHWs provide iCCM care, either in the patient's home or at the VHW's home, as part of the national Village Health Teams system[2–4]. These VHWs also retain their existing roles in health promotion efforts. In Bugoye Subcounty, Uganda, a rural, mountainous area in Kasese District (on the western border of Uganda), VHWs from the national program have provided iCCM care since 2013, with financial and operational support from a longstanding collaboration with Mbarara University of Science and Technology (Mbarara, Uganda) and the Massachusetts General Hospital (Boston, Massachusetts, USA).

Prior studies have employed several different approaches to assess iCCM quality of care, including direct observation of VHWs (with or without reexamination of the patient by a trained clinician), review of VHWs' clinical records, case scenarios, and surveys of patients' caregivers. Each approach comes with certain risks of bias and with different ability to measure the varied aspects of quality of care. Direct observation of VHWs with reexamination of patients allows for the most comprehensive assessment of quality of care, though the presence of an observer may alter VHWs' clinical practice (Hawthorne effect). A record review approach cannot assess all elements of quality of care and measures quality of recorded care rather than quality of actual care. However, record review has the benefit of easier repeated or widespread implementation. Prior studies comparing different methods of assessing quality of iCCM care, with direct observation of VHWs and reexamination of patients as the gold standard, have found that record review, case scenarios, and direct observation alone all tend to overestimate quality of care somewhat[5,6]. While acknowledging that limitation, in this study we employ a record review approach because it feasibly allows for continuous assessment of quality of care over years.

In Uganda, prior studies using direct observation[7], record review[8], and surveys of caregivers[9] have generally demonstrated high quality of iCCM care, within the limits of each approach. However, there are few evaluations examining changes in iCCM care quality over time. One prior study in Kenya used direct observation of VHWs and reexamination of patients, with 3 evaluations conducted over the 4-year period after VHWs' initial iCCM training. This study demonstrated improvement in some quality measures and worsening of other measures over time but did not assess for an overall trend in quality over time[10]. We previously examined trends in quality of care over the first 2 years of the iCCM program in Bugoye using a record review approach, showing improvement in the proportions of patients receiving correct care (quality of care) over the initial 6 months after iCCM care initiation and stable quality of care for the remaining 18 months[11]. Several other studies have examined quality of care provided by VHWs with differing levels of experience but have not provided results stratified by experience level[12,13]. Prior studies in Bugoye and other settings have also examined the

1  
2  
3 specific iCCM skills of performing and interpreting rapid diagnostic tests (RDT) for malaria,  
4 finding that VHWs are able to maintain these skills over a 1–4 year period[14–16].  
5  
6

7 Since iCCM programs provide frontline care for common but potentially fatal childhood  
8 illnesses, programs must be able to monitor and ensure quality of care over time. Here we  
9 describe quality of iCCM care over a nearly 5-year period, as VHWs gain clinical experience but  
10 are also further from their initial iCCM training.  
11  
12

## 13 14 **METHODS**

### 15 16 **Study design**

17 In this retrospective, observational study, we examined overall iCCM quality of care as well as  
18 specific components of iCCM care for two cohorts of VHWs using a record review approach for  
19 all clinical encounters occurring between April 2014–December 2018. For each cohort we also  
20 examined trends in quality of care over time. For the first cohort of VHWs, we sought to assess  
21 long-term trends in quality of care, building on the prior evaluation of the first 2 years of iCCM  
22 care provided by this cohort[11]. For the second cohort of VHWs, we sought to assess quality of  
23 care over the initial 2.5 years of iCCM care provided by this cohort, using a larger dataset of all  
24 clinical encounters rather than sampled encounters to further evaluate our prior findings on  
25 quality of iCCM care after initial training.  
26  
27  
28  
29

30 The descriptive primary outcome measure was the proportion of patients receiving overall  
31 correct care, defined as adherence to all elements of the iCCM protocol for the presenting  
32 condition (further description of the iCCM protocol is provided below). We have termed this  
33 outcome measure quality of care, acknowledging that a retrospective record review approach  
34 cannot assess all domains of quality of care. The analytic primary outcome measure examined  
35 trends over time in quality of care, again using a binary classification of overall correct or  
36 incorrect care. Secondary outcome measures also used a binary correct or incorrect  
37 classification, and included VHWs' adherence to correct diagnostic protocol, correct prescribing  
38 practices, and correct referral of patients to a health facility. Pre-planned and final measures  
39 were the same.  
40  
41  
42  
43

### 44 **Study setting**

45 VHWs in Bugoye are selected by community members in their villages as part of the national  
46 Village Health Teams program and serve their communities as part-time volunteers. All VHWs  
47 are required to have achieved basic literacy, and most have completed primary school. All  
48 VHWs received 3 days of initial general training, 5 days of initial iCCM training, and half-day  
49 refresher trainings on a quarterly basis throughout the time period examined here. Clinical staff  
50 members at the government-funded health center in Bugoye are trained as iCCM instructors  
51 and lead the quarterly training sessions as well as providing field-based individual supervision.  
52 In addition to their other responsibilities, VHWs provide iCCM care for malaria, pneumonia, and  
53 diarrhea in children between 2 months and 5 years old. In keeping with World Health  
54 Organization/UNICEF standards, VHWs perform rapid diagnostic tests for malaria (RDT) and  
55  
56  
57  
58  
59  
60

1  
2  
3 provide artemisinin combination therapy (ACT) if indicated, measure respiratory rate and treat  
4 presumed pneumonia with amoxicillin, and evaluate children with diarrhea and treat with oral  
5 rehydration solution (ORS) and zinc, as well as assessing children for signs of severe illness  
6 (danger signs) and providing health education[1]. VHWs refer children with other conditions or  
7 with danger signs to a health facility. The first cohort (24 VHWs) began providing iCCM care in  
8 March 2013 in 5 villages; one VHW was added in 2016 to replace a VHW who had moved away.  
9 The second cohort (14 VHWs) began providing iCCM care in July 2016 in 3 additional villages.  
10 Both cohorts received the same initial training, refresher trainings, and supervision. In this  
11 program, Mbarara University of Science and Technology and Massachusetts General Hospital  
12 fund program administration and the purchase medications and malaria rapid diagnostic tests  
13 as well as providing staff support to enhance data collection and quality improvement efforts.  
14 During the time period examined here, iCCM care had not yet been implemented throughout  
15 the national Village Health Teams program.  
16  
17  
18  
19

### 20 **Data collection**

21 During the time period assessed in this study, VHWs in Bugoye used paper records to record  
22 information from each clinical encounter. At the end of each month, program staff collected  
23 the paper records and entered information from each clinical encounter into a customized  
24 Epidata form[17] (implemented separately from national reporting systems) and stored in a  
25 Research Electronic Data Capture (REDCap) database[18]. The paper record forms contain basic  
26 information about the patient (age, sex, presenting complaints), clinical assessment data  
27 (presence of danger signs, respiratory rate, and malaria rapid diagnostic test result), and actions  
28 taken (medications administered and/or referral to the health facility).  
29  
30  
31

32 Deidentified data for all encounters from April 2014–December 2018 (reflecting all available  
33 months in the electronic clinical database) were extracted to create the research dataset used  
34 for this study. Data were then cleaned, with comparison to paper records in case of a mismatch  
35 between similar variables (e.g., report month and visit date) or other suspected inaccuracies.  
36 Infants under 2 months of age were excluded from analysis as they were likely seen for  
37 newborn wellness checks separate from iCCM care. Stata Version 15 (StataCorp, College  
38 Station, TX) was used to check for presumed duplicate entries in the database. Decision rules in  
39 Stata were used to determine whether the care each patient received (based on the paper  
40 record form) matched with correct care according to the iCCM protocol. For patients presenting  
41 with fever, elements of correct care include performing a rapid diagnostic test for malaria and  
42 recording the result, treatment with artemisinin combination therapy if the test is positive, and  
43 referral to a health facility if the test is negative. For patients presenting with cough/fast  
44 breathing, elements of correct care include measuring and recording the respiratory rate and  
45 treatment with oral amoxicillin if the respiratory rate is above age-based cutoffs (based on  
46 patients' recorded age and respiratory rate we could assess whether the VHW made this  
47 determination appropriately). For patients presenting with diarrhea, correct care constituted  
48 treatment with oral rehydration solution (ORS) and zinc. For patients recorded as having danger  
49 signs, we assessed whether the patient was referred to a health facility and received  
50 appropriate pre-referral treatment (if indicated). Certain elements of correct care (e.g.,  
51  
52  
53  
54  
55  
56  
57  
58  
59  
60



1  
2  
3 medication dosage, specific elements of health education provided) could not be assessed  
4 because they are not included on the paper record form.  
5

### 6 7 **Data analysis**

8 The analytic methods for this study are quite similar to our prior study of iCCM care quality over  
9 the initial 2 years of this program[11]. In addition to the measures above, we also examined the  
10 proportion of VHWs providing high-quality care for each of the main iCCM conditions, using  
11 thresholds of 70% and 84% of encounters with correct care. These thresholds were chosen to  
12 accord with our prior findings which employed a lot quality assurance sampling approach[11].  
13 Since failure to refer a patient with subjective fever and a negative RDT was a common and  
14 likely low-consequence error[19], we also examined the overall proportion of patients receiving  
15 correct care if this error is excluded.  
16  
17

18  
19 We assessed population average trends in quality of care over time using logistic regression  
20 models with generalized estimating equations (GEE) with robust standard errors to account for  
21 correlation by VHW (and potential clustering resulting from inclusion of multiple visits for the  
22 same child). For this analysis, we used a binary outcome variable representing correct or  
23 incorrect care according to the iCCM protocol, with time in months since the VHW began  
24 providing iCCM care as the exposure variable, to examine changes in the odds of receiving  
25 correct care over time. After graphical depiction of the data, we fit models with and without  
26 splines for each cohort of VHWs. We used the quasi-likelihood under the independence  
27 criterion (QIC) to compare model fit between the models with and without splines. The VHW  
28 who joined the program later in a village from the first cohort was excluded from this portion of  
29 analysis.  
30  
31  
32  
33

### 34 **Ethics approval**

35 Ethical approval for this study was granted by the Partners Healthcare IRB and the Research  
36 Ethics Committee at the Mbarara University of Science and Technology. Because the study  
37 involved only analysis of deidentified clinical records, individual patients' caregivers were not  
38 consented for the study.  
39  
40

### 41 **Patient and public involvement**

42 While patients' families were not directly involved in developing the research question or  
43 outcome measures for this study, community members play a key role in selecting the VHWs  
44 who provide care in their communities. In a separate study we have also sought to understand  
45 families' experience of and satisfaction with iCCM care to identify program strengths and areas  
46 for improvement[20]. Evaluation of iCCM quality of care has also helped tailor the content of  
47 VHW refresher trainings and other quality improvement efforts.  
48  
49  
50

## 51 **RESULTS**

52 After exclusion of 48 encounters for children under 2 months old and 339 presumed duplicate  
53 entries, VHWs completed a total of 18,430 clinical encounters between April 2014–December  
54 2018. VHWs in the first cohort accounted for 74% of these encounters (Table 1). Because the  
55 data are deidentified and do not contain a unique identifier variable like a medical record  
56  
57  
58  
59  
60



number, it was not possible to determine how many unique children received care from a VHW during this period. For brevity, hereafter we refer to “patients” rather than clinical encounters. The proportion of female patients and mean age of patients were similar between the first cohort and second cohort of VHWs. Subjective fever was the most common presenting complaint, followed by cough/fast breathing, and then diarrhea (59%, 45%, and 28%, respectively; percentages add to >100% because some patients presented with multiple complaints). In both cohorts, 1% of patients were noted to have danger signs.

Table 1: Patient demographic information and summary of all Integrated Community Case Management clinical encounters (April 2014–December 2018 for first cohort VHWs, July 2016–December 2018 for second cohort VHWs)

| Measure                                 | n (%) or mean (range) |                    |              |
|-----------------------------------------|-----------------------|--------------------|--------------|
|                                         | First cohort VHWs     | Second cohort VHWs | Overall      |
| Total encounters*                       | 13,650 (74%)          | 4,780 (26%)        | 18,430       |
| Female                                  | 6,780 (50%)           | 2,325 (49%)        | 9,105 (49%)  |
| Age in months**                         | 28.5 (2–60)           | 27.0 (2–60)        | 28.1 (2–60)  |
| <i>Presenting complaints***</i>         |                       |                    |              |
| Fever                                   | 8,418 (62%)           | 2,394 (50%)        | 10,812 (59%) |
| Cough/fast breathing                    | 5,890 (43%)           | 2,449 (51%)        | 8,339 (45%)  |
| Diarrhea                                | 3,818 (28%)           | 1,352 (28%)        | 5,170 (28%)  |
| Other/not recorded                      | 600 (4%)              | 149 (3%)           | 749 (4%)     |
| Patients with danger signs              | 171 (1%)              | 58 (1%)            | 229 (1%)     |
| <i>Actions/outcomes</i>                 |                       |                    |              |
| Respiratory rate measured               | 6,377 (47%)           | 2,472 (52%)        | 8,849 (48%)  |
| Respiratory rate elevated               | 5,756 (90%)           | 2,293 (93%)        | 8,049 (91%)  |
| RDT performed                           | 9,316 (68%)           | 2,715 (57%)        | 12,031 (65%) |
| RDT positive                            | 7,060 (76%)           | 1,719 (63%)        | 8,779 (73%)  |
| Patients treated with ACT               | 7,022 (51%)           | 1,706 (36%)        | 8,728 (47%)  |
| Patients treated with amoxicillin       | 5,972 (44%)           | 2,457 (51%)        | 8,429 (46%)  |
| Patients treated with ORS and zinc      | 3,841 (28%)           | 1,331 (28%)        | 5,172 (28%)  |
| Patients treated with rectal artesunate | 95 (1%)               | 38 (1%)            | 133 (1%)     |
| Patients referred to health facility    | 783 (6%)              | 303 (6%)           | 1,086 (6%)   |
| Medication reactions                    | 2 (0.01%)             | 0 (0%)             | 2 (0.01%)    |
| Deaths                                  | 1 (0.01%)             | 1 (0.02%)          | 2 (0.01%)    |

Abbreviations: ACT, artemisinin combination therapy; ORS, oral rehydration solution; RDT, rapid diagnostic test for malaria; VHW, village health worker

\*339 presumed duplicate encounters as well as 76 encounters with no clinical information recorded are excluded from the analysis

\*\*48 infants under 2 months of age were excluded from the analysis as they were likely seen for newborn assessments rather than iCCM care

\*\*\*Percentages add to >100%, as some patients presented with multiple complaints

For patients with measured respiratory rate, 91% had a respiratory rate above age-based cutoffs. VHWs performed a total of 12,031 malaria RDTs, of which 8,879 (73%) were positive. There were 8,728 patients treated with ACT, 8,429 patients treated with amoxicillin, and 5,172 patients treated with oral rehydration salts and zinc. Higher proportions of patients treated by VHWs in the first cohort presented with fever (62% vs. 50%), received an RDT (68% vs. 57%), and had positive RDTs (76% vs. 63%). Correspondingly, a higher proportion of patients treated by VHWs in the first cohort received ACT (51% vs. 36%). There were 133 patients (1%) treated with rectal artesunate, and 1,086 (6%) referred to a health facility. There were 2 patients recorded as having adverse reactions to medications, and 2 recorded deaths (Table 1).

Regarding quality measures, 97% of patients presenting with subjective fever correctly received an RDT (98% of those treated by VHWs in the first cohort vs. 94% of those treated by VHWs in the second cohort). Of patients diagnosed with malaria by RDT, 93% received correct management (94% vs. 88%). However, of patients with a negative RDT, only 23% were appropriately referred to a health facility (21% vs. 26%). Of patients presenting with cough or subjective fast breathing, 96% had their respiratory rate recorded (97% vs. 94%). Of those with an elevated respiratory rate and thus presumed pneumonia based on the iCCM algorithm, 90% received correct treatment (92% vs. 90%). Of patients with danger signs, 77% were appropriately referred to a health facility (80% vs 69%), and 60% received appropriate pre-referral treatment (56% vs. 72%); see Table 2.

Table 2: Integrated Community Case Management quality of care measures

| Measure                                                                                  | First cohort VHWs<br>n (%) | Second cohort VHWs<br>n (%) | Overall<br>n (%) |
|------------------------------------------------------------------------------------------|----------------------------|-----------------------------|------------------|
| RDT performed for patient presenting with fever                                          | 8,278 (98%)                | 2,258 (94%)                 | 10, 536 (97%)    |
| Malaria patients receiving correct management                                            | 6,864 (94%)                | 1,617 (88%)                 | 8,481 (93%)      |
| Patients with negative RDT receiving correct management                                  | 323 (21%)                  | 172 (26%)                   | 495 (23%)        |
| Respiratory rate recorded for patient presenting with cough or subjective fast breathing | 5,693 (97%)                | 2,305 (94%)                 | 7,998 (96%)      |
| Patients with elevated respiratory rate receiving correct treatment                      | 5,625 (92%)                | 2,200 (86%)                 | 7,825 (90%)      |
| Patients with diarrhea receiving ORS and zinc                                            | 3,699 (92%)                | 1,281 (90%)                 | 4,980 (92%)      |
| Patients inappropriately treated with ACT (out of total patients)                        | 182 (1%)                   | 100 (2%)                    | 282 (2%)         |
| Inappropriate ACT prescriptions (out of total ACT prescriptions)                         | 182 (3%)                   | 100 (6%)                    | 282 (3%)         |
| Patients inappropriately treated with amoxicillin (out of total patients)                | 343 (3%)                   | 256 (5%)                    | 599 (3%)         |
| Inappropriate amoxicillin prescriptions (out of total amoxicillin prescriptions)         | 343 (6%)                   | 256 (10%)                   | 599 (7%)         |

|                                                                                                               |              |             |              |
|---------------------------------------------------------------------------------------------------------------|--------------|-------------|--------------|
| Patients inappropriately treated with ORS, zinc, or both (out of total patients)                              | 188 (1%)     | 73 (2%)     | 261 (1%)     |
| Inappropriate ORS or zinc prescriptions (out of total ORS and zinc prescriptions)                             | 188 (5%)     | 73 (5%)     | 261 (5%)     |
| Patients with danger signs appropriately referred to health facility                                          | 137 (80%)    | 40 (69%)    | 177 (77%)    |
| Patients with danger signs receiving appropriate pre-referral treatment                                       | 96 (56%)     | 42 (72%)    | 138 (60%)    |
| Patients receiving overall correct management (all months)*                                                   | 10,455 (77%) | 3,244 (68%) | 13,699 (74%) |
| Patients receiving overall correct management (July 2016 - December 2018)                                     | 5,560 (75%)  | 3,244 (68%) | 8,804 (72%)  |
| Patients receiving overall correct management, excluding referral of patients with negative RDT (all months)* | 11,486 (84%) | 3,654 (76%) | 15,140 (82%) |

Abbreviations: ACT, artemisinin combination therapy; ORS, oral rehydration solution; RDT, rapid diagnostic test for malaria; VHW, village health worker

\*April 2014 - December 2018 for original VHWs; July 2016 - December 2018 for expansion VHWs

Overall, 74% of patients received correct management (77% vs. 68%). When comparing only the time period in which the second cohort of VHWs was providing iCCM care, 72% of patients received correct management (75% vs 68%). Excluding the common error of failing to refer patients with a negative malaria RDT, 82% of patients received correct management (84% vs 76%).

Inappropriate use of medications was fairly low, with 2% of patients receiving ACT inappropriately, 3% of patients receiving amoxicillin inappropriately, and 1% of patients receiving ORS, zinc, or both inappropriately (Table 2). This constituted 3%, 7%, and 5% of prescriptions for those medications, respectively. These proportions were similar between the two cohorts of VHWs.

Regarding individual VHWs' performance, of the 38 VHWs, all 38 VHWs provided correct care for at least 70% of patients with malaria, and 34 VHWs provided correct care for least 84% of patients with malaria, compared with 35 and 30 VHWs (respectively) for patients with presumed pneumonia, 36 and 29 VHWs (respectively) for patients with diarrhea, and 24 and 7 VHWs (respectively) for all patients. If failure to refer patients with a negative RDT is excluded, then 35 VHWs met the 70% threshold for overall correct care, and 16 VHWs met the 84% threshold for overall correct care (Table 3).

Table 3: Village health worker-level quality of care measures

| Measure                                                                               | In >70% of encounters<br>n (%)* | In >84% of encounters<br>n (%)* |
|---------------------------------------------------------------------------------------|---------------------------------|---------------------------------|
| VHWs providing correct care for malaria                                               | 38 (100%)                       | 34 (89%)                        |
| VHWs providing correct care for presumed pneumonia                                    | 35 (92%)                        | 30 (79%)                        |
| VHWs providing correct care for diarrhea                                              | 36 (95%)                        | 29 (76%)                        |
| VHWs providing overall correct care                                                   | 24 (63%)                        | 7 (18%)                         |
| VHWs providing overall correct care, excluding referral of patients with negative RDT | 35 (92%)                        | 16 (42%)                        |

Abbreviations: RDT, rapid diagnostic test for malaria; VHW, village health worker

\*The 70% and 84% thresholds were chosen to accord with our prior lot quality assurance sampling approach, allowing for comparison between the two studies

Graphical depiction of overall correct care over time for the first cohort of VHWs appeared to show a gradual increase until approximately March 2016 (3 years after iCCM care initiation), followed by gradual decrease (Figure 1). Modelling time as a continuous variable (months since the cohort began providing iCCM care) estimated a 0.6% decreased odds of correct care for each month (OR 0.994, 95% CI 0.988-0.999,  $p=0.032$ ). Based on the graphical depiction, the addition of a spline knot at the 3-year mark demonstrated a slight trend toward increasing correctness of care up until the 3-year mark (OR 1.022, 95% CI 1.005-1.038,  $p=0.009$ ), followed by decreasing correctness of care after that point (OR 0.978, 95% CI 0.970-0.986,  $p<0.001$ ), with an improvement in model fit based on the QIC values (Table 4).

Table 4: GEE logistic regression models for quality of care over time

| Measure                                                                                                                                                   | OR    | 95% CI      | p-value | Model QIC* |
|-----------------------------------------------------------------------------------------------------------------------------------------------------------|-------|-------------|---------|------------|
| <i>First cohort VHWs, overall correct care**</i>                                                                                                          |       |             |         | 14587      |
| Months since iCCM services initiation                                                                                                                     | 0.994 | 0.988–0.999 | 0.032   |            |
| <i>First cohort VHWs, overall correct care, with spline knot at 3 years after iCCM care initiation**</i>                                                  |       |             |         | 14524      |
| Months since iCCM services initiation - Months 14–36                                                                                                      | 1.022 | 1.005–1.038 | 0.009   |            |
| Months since iCCM services initiation - Months 36–70                                                                                                      | 0.978 | 0.970–0.986 | <0.001  |            |
| <i>First cohort VHWs, overall correct care excluding referral of patients with negative RDT**</i>                                                         |       |             |         | 11747      |
| Months since iCCM services initiation                                                                                                                     | 0.999 | 0.993–1.004 | 0.632   |            |
| <i>First cohort VHWs, overall correct care excluding referral of patients with negative RDT, with spline knot at 3 years after iCCM care initiation**</i> |       |             |         | 11718      |
| Months since iCCM services initiation - Months 14–36                                                                                                      | 1.023 | 1.005–1.043 | 0.015   |            |
| Months since iCCM services initiation - Months 36–70                                                                                                      | 0.984 | 0.976–0.993 | <0.001  |            |
| <i>Second cohort VHWs, overall correct care</i>                                                                                                           |       |             |         | 6057       |
| Months since iCCM services initiation                                                                                                                     | 1.007 | 0.989–1.025 | 0.475   |            |

|    |                                                                                                           |       |             |       |
|----|-----------------------------------------------------------------------------------------------------------|-------|-------------|-------|
| 1  |                                                                                                           |       |             |       |
| 2  |                                                                                                           |       |             |       |
| 3  |                                                                                                           |       |             |       |
| 4  | <i>Second cohort VHWs, overall correct care, with spline knot at 6 months after iCCM care initiation</i>  |       |             | 6061  |
| 5  | Months since iCCM services initiation - Months 1–6                                                        | 1.068 | 0.971–1.175 | 0.175 |
| 6  | Months since iCCM services initiation - Months 7–30                                                       | 0.998 | 0.973–1.022 | 0.845 |
| 7  |                                                                                                           |       |             |       |
| 8  | <i>Second cohort VHWs, overall correct care, with spline knot at 18 months after iCCM care initiation</i> |       |             | 6047  |
| 9  | Months since iCCM services initiation - Months 1–18                                                       | 1.027 | 1.004–1.050 | 0.023 |
| 10 | Months since iCCM services initiation - Months 19–30                                                      | 0.963 | 0.926–1.000 | 0.053 |
| 11 |                                                                                                           |       |             |       |
| 12 | <i>Second cohort VHWs, overall correct care excluding referral of patients with negative RDT</i>          |       |             | 5272  |
| 13 | Months since iCCM services initiation                                                                     | 1.026 | 1.007–1.045 | 0.006 |
| 14 | <hr/>                                                                                                     |       |             |       |

Abbreviations: CI, confidence interval; iCCM, Integrated Community Case Management; OR, odds ratio; QIC, quasi-likelihood under the independence model criterion; RDT, rapid diagnostic test for malaria; VHW, village health worker

\*Quasi-likelihood under the independence model criterion. This is a modification of the Akaike information criterion (AIC) so that it can be applied to GEE regression models to assess goodness of fit of different models. A lower QIC term reflects a better-fitting regression model.

\*\*One VHW joined the first cohort of VHWs later, and is thus excluded from this analysis

Graphical depiction of correct referral of patients with a negative RDT for the first cohort of VHWs appeared to show worse performance over time; exclusion of this error appeared to moderate the trend toward decreasing quality of care in later months (Figure 1). Repeating the model with the outcome variable as overall correct care excluding referral of patients with negative RDT estimated essentially constant correctness of care over time (OR 0.999, 95% CI 0.993-1.004,  $p=0.632$ ). The addition of a spline knot at the 3-year mark resulted in similar findings to using the main outcome variable of overall correct care (slightly increasing correctness of care up until the 3-year mark, followed by slightly decreasing correctness of care); see Table 4 and Figure 2.

Graphical depiction of overall correct care over time for the second cohort of VHWs appeared to show a slight increase in correct care over approximately the first 6 months after iCCM program initiation, followed by a plateau and then a further increase until approximately 18 months, followed by a gradual decline (Figure 1). Modelling time as a continuous variable (months since the cohort began providing iCCM care) estimated essentially constant correctness of care over time (OR 1.007, 95% CI 0.989, 1.025,  $p=0.475$ ); see Table 4. Based on the graphical appearance as well as our prior findings [11], we created two additional models, one with a spline knot at 6 months, and one with a spline knot at 18 months. The model with the spline knot at 6 months did not meaningfully change the result (months 1-6: OR 1.068, 95% CI 0.971-1.175,  $p=0.175$ ; months 7-30: OR 0.998, 95% CI 0.973-1.022,  $p=0.845$ ). The model with the spline knot at 18 months showed some evidence of a trend toward increasing correctness of care over the first 18 months and decreasing correctness of care over the remaining 12 months (months 1-18: OR 1.027, 95% CI 1.004-1.050,  $p=0.023$ ; months 18-30: OR 0.963, 95% CI 0.926-1.000,  $p=0.053$ ), with an improvement in model fit based on the QIC values (Table 4).

Similar to the first cohort, graphical depiction of correct referral of patients with a negative RDT by VHWs in the second cohort appeared to show worse performance over time; exclusion of this error resulted in a relatively linear-appearing trend toward increasing correctness of care

1  
2  
3 over time, followed by a slight decline over the final 6 months (Figure 1). Repeating the model  
4 with the outcome variable as correct care excluding referral of patients with negative RDT  
5 demonstrated a trend toward increasing correctness of care over time (OR 1.026, 95% CI 1.007-  
6 1.045,  $p=0.006$ ); see Table 4.  
7  
8

## 9 DISCUSSION

10 Patient demographic data and presenting complaints were broadly similar between patients  
11 treated by the two cohorts of VHWs. Overall quality of care was slightly higher for the first  
12 cohort of VHWs compared with the second cohort (77% vs 68%). Both cohorts demonstrated  
13 high quality of care for uncomplicated malaria, pneumonia, and diarrhea (>90% on all measures  
14 for the first cohort, and >85% for all measures for the second cohort). Encouragingly, overuse of  
15 medications was fairly low in both cohorts as well. To the best of our knowledge, the program  
16 never experienced stockouts of medications, so VHWs' ability to provide correct care would not  
17 have been affected by unavailability of the necessary medication.  
18  
19  
20

21 These findings are broadly similar to our prior evaluation of quality of care in Bugoye as well as  
22 other studies in Uganda[7–9,11]. Studies on iCCM care in other countries in Sub-Saharan Africa  
23 have demonstrated greater heterogeneity. Some have documented correct care for 70–90% of  
24 encounters[12,21–23]. Others have documented lower quality of care overall[13,24] or in the  
25 control group or pre-assessment evaluation in several intervention studies[25,26]. Local context  
26 might explain some of the variation in quality of care. In this setting, all scheduled trainings  
27 took place (to the best of our knowledge), external funding ensured a consistent supply of  
28 diagnostic tests and medications, and monthly collection of paper record forms might have  
29 helped provide accountability. These factors might result in higher quality of care compared  
30 with settings in which iCCM is implemented more broadly.  
31  
32  
33  
34

35 In both cohorts, the proportion of patients with fever and negative malaria RDT appropriately  
36 referred to a health facility was quite low. Our prior evaluation also identified this as a common  
37 error[11], which prompted refresher training on this topic. The persistence of this error despite  
38 refresher training might indicate that this represents an intentional decision by VHWs rather  
39 than an unintentional error; perhaps VHWs have observed that such patients often have self-  
40 limiting viral illnesses and recover without intervention. For this error (as well as other errors),  
41 caregiver preferences or requests might also have influenced VHWs. For instance, caregivers  
42 might not wish to be referred to the health facility because of the time spent traveling to the  
43 facility and waiting to be seen. Some iCCM programs advise symptomatic management and at-  
44 home follow-up rather than referral for patients with subjective fever and a negative malaria  
45 RDT[19]. When this error was excluded, overall quality of care for all other patients was 84%  
46 and 76% in the first and second cohorts respectively. While inappropriate use of medications  
47 was fairly low, pressure from caregivers to provide a medication could also have influenced  
48 VHWs' treatment decisions.  
49  
50  
51  
52

53 VHWs did not perform as well for appropriate referral and pre-referral treatment of patients  
54 with danger signs. This finding is somewhat concerning as these patients are likely at highest  
55 risk of poor outcomes or death. Very few deaths were reported, though deaths might be  
56  
57  
58  
59  
60



1  
2  
3 underreported as VHWs might not update their clinical encounter record if a child later dies  
4 during that illness episode. Additionally, deaths might have occurred in children who were  
5 never evaluated by a VHW; caregivers who recognize that a child has severe illness might  
6 proceed directly to a health facility rather than seeking care from a VHW.  
7  
8

9 We employee GEE regression models to examine trends in quality of care over time (GEE  
10 models estimate a population average effect, so these trends should be interpreted as such).  
11 For the first cohort of VHWs, quality of care appeared to increase modestly until approximately  
12 3 years after their initial iCCM training, followed by a gradual decrease in quality of care. While  
13 the magnitude of change is small, the trend toward decreasing quality of care in the later years  
14 requires further monitoring. Uganda relies on an all-volunteer VHWs workforce, which could  
15 result in decreased motivation over time. Alternatively, as VHWs gain experience and are  
16 further from their initial training, they may begin to rely more on clinical judgment and follow  
17 the iCCM protocol less closely.  
18  
19  
20

21 For the second cohort of VHWs, quality of care was essentially constant over time. This finding  
22 is in contrast to our prior study demonstrating increasing quality of care over the first 6 months  
23 in the first cohort of VHWs[11]. When referral of patients with a negative RDT was excluded,  
24 quality of care for the second cohort appeared to gradually improve over time.  
25  
26

27 This study has at least 5 limitations. First, while we conducted some data cleaning and assessed  
28 for duplicate entries as detailed above, these data were not double-entered. Given the large  
29 volume of clinical encounters, some data entry errors likely persist. However, such errors are  
30 less likely to cause systematic bias. Second, some elements of correct care are not captured on  
31 the paper registers, and thus cannot be assessed here (e.g., correct drug dosages), which may  
32 overestimate quality of care. More broadly, a record review approach cannot capture whether  
33 or how much health education is provided, or VHWs' ability to assess children's overall health  
34 and identify more chronic issues such as malnutrition. Third, this study assesses quality of  
35 recorded care rather than quality of actual care. In some instances, this may overestimate  
36 quality of care—e.g., we cannot assess whether a VHW correctly performed and interpreted a  
37 malaria RDT or measured respiratory rate correctly. In other cases, a VHW could provide  
38 correct care but have the encounter classified as incorrect due to incomplete record-keeping.  
39 For instance, because the words for “fever” and “malaria” are often used interchangeably in the  
40 local language, some VHWs seem to have recorded a patient as having subjective fever only if  
41 the malaria RDT was positive. For a patient with a negative RDT, this misunderstanding would  
42 make it appear that the VHW had incorrectly performed an RDT for a patient without subjective  
43 fever (when in fact the RDT was appropriately performed). Overall however, prior research  
44 suggests that record review somewhat overestimates quality of care when compared with  
45 direct observation of VHWs with reexamination by a clinician[5,6]. Fourth, because the data are  
46 deidentified and lack a reliable unique identifier variable, two or more illness episodes for the  
47 same child may be included. However, this issue is unlikely to affect the results significantly, as  
48 quality of care for different episodes of illness for a given individual are not necessarily  
49 correlated (beyond the correlation of receiving care from the same VHW). Fifth, while this study  
50  
51  
52  
53  
54  
55  
56  
57  
58  
59  
60

assesses a large number of patient encounters, it includes a fairly small number of VHWs in a single geographic area, limiting its generalizability.

## CONCLUSION

Overall, this study suggests that VHWs continue to provide high quality of care for uncomplicated malaria, pneumonia, and diarrhea nearly 5 years after initial training, with lower quality of care for patients with danger signs. Further qualitative evaluation may help elucidate why VHWs persistently fail to refer patients with subjective fever and a negative malaria RDT. To the best of our knowledge, this is the first study to track overall quality of care over an extended timeframe. The modest trend toward decreasing quality of care after 3 years of providing iCCM care in the first cohort of VHWs requires further monitoring.

## List of abbreviations

ACT: artemisinin combination therapy; GEE: generalized estimating equations; iCCM: Integrated Community Case Management; ORS: oral rehydration solution; QIC: quasi-likelihood under the independence criterion; RDT: rapid diagnostic test; VHW: village health worker

## Acknowledgments:

We are grateful to Sarah Masika, Rapheal Mbusa, Stephen Baguma, Sara Mian-McCarthy, and Emily Cable for their work in administering and supporting the village health worker program in Bugoye. We are grateful to all the village health workers for volunteering to provide critical services to their communities.

**Competing interests:** The authors declare that they have no competing interests

**Funding:** This work was supported by the Mooney-Reed Charitable Foundation (Award/Grant number is not applicable) and the Massachusetts General Hospital Department of Medicine (Award/Grant number is not applicable).

**Ethical review:** Ethical approval for this study was granted by the Partners Healthcare IRB (2016P001423) and the Research Ethics Committee at the Mbarara University of Science and Technology (14/06-16). Because the study involved only analysis of deidentified clinical records, individual patients' caregivers were not consented for the study.

**Authors' contributions:** JSM, EMM, JK, RR, and GSS conceived and designed the study. ACW and EMM led data collection, with contributions from NM, JM, MM, MN, DAG, PRP, SB, and JSM. JSM led data analysis, with contributions from ACW and EMM. JSM and EMM drafted initial versions of the manuscript. All authors contributed to manuscript writing and approved the final manuscript.

**Data sharing statement:** Data are available for non-commercial use from the corresponding author (jsmiller@post.harvard.edu) upon reasonable request.



## References

- 1 World Health Organization, UNICEF. WHO/UNICEF Joint Statement: Integrated Community Case Management (iCCM). 2012. [https://www.who.int/maternal\\_child\\_adolescent/documents/statement\\_child\\_services\\_access\\_whounicef.pdf](https://www.who.int/maternal_child_adolescent/documents/statement_child_services_access_whounicef.pdf) (accessed 29 Oct 2021).
- 2 Republic of Uganda Ministry of Health. Village Health Team Strategy and Operational Guidelines. 2010. <http://library.health.go.ug/publications/health-education/village-health-team-strategy-and-operational-guidelines> (accessed 12 Sep 2020).
- 3 Republic of Uganda Ministry of Health. National Village Health Teams (VHT) assessment in Uganda. 2015. <http://library.health.go.ug/publications/health-education/national-village-health-teamsvht-assessment-uganda> (accessed 12 Sep 2020).
- 4 The Republic of Uganda Ministry of Health. Integrated Community Case Management of Childhood Malaria, Pneumonia and Diarrhoea: Implementation Guidelines. 2010. <http://library.health.go.ug/publications/child-health-school-health/integrated-community-case-management-childhood-malaria> (accessed 25 Jul 2020).
- 5 Cardemil CV, Gilroy KE, Callaghan-Koru JA, *et al.* Comparison of methods for assessing quality of care for community case management of sick children: an application with community health workers in Malawi. *Am J Trop Med Hyg* 2012;**87**:127–36. doi:10.4269/ajtmh.2012.12-0389
- 6 Miller NP, Amouzou A, Hazel E, *et al.* Assessing the Quality of Sick Child Care Provided by Community Health Workers. *PloS One* 2015;**10**:e0142010. doi:10.1371/journal.pone.0142010
- 7 Mukanga D, Babirye R, Peterson S, *et al.* Can lay community health workers be trained to use diagnostics to distinguish and treat malaria and pneumonia in children? Lessons from rural Uganda. *Trop Med Int Health* 2011;**16**:1234–42. doi:10.1111/j.1365-3156.2011.02831.x
- 8 Awor P, Wamani H, Tylleskar T, *et al.* Drug seller adherence to clinical protocols with integrated management of malaria, pneumonia and diarrhoea at drug shops in Uganda. *Malar J* 2015;**14**:277. doi:10.1186/s12936-015-0798-9
- 9 Soremekun S, Kasteng F, Lingam R, *et al.* Variation in the quality and out-of-pocket cost of treatment for childhood malaria, diarrhoea, and pneumonia: Community and facility based care in rural Uganda. *PloS One* 2018;**13**:e0200543. doi:10.1371/journal.pone.0200543

- 10 Kelly JM, Osamba B, Garg RM, *et al.* Community health worker performance in the management of multiple childhood illnesses: Siaya District, Kenya, 1997-2001. *Am J Public Health* 2001;**91**:1617–24.
- 11 Miller JS, English L, Matte M, *et al.* Quality of care in integrated community case management services in Bugoye, Uganda: a retrospective observational study. *Malar J* 2018;**17**:99. doi:10.1186/s12936-018-2241-5
- 12 Baynes C, Mboya D, Likasi S, *et al.* Quality of Sick Child-Care Delivered by Community Health Workers in Tanzania. *Int J Health Policy Manag* 2018;**7**:1097–109. doi:10.15171/ijhpm.2018.63
- 13 Gilroy KE, Callaghan-Koru JA, Cardemil CV, *et al.* Quality of sick child care delivered by Health Surveillance Assistants in Malawi. *Health Policy Plan* 2013;**28**:573–85. doi:10.1093/heapol/czs095
- 14 Counihan H, Harvey SA, Sekeseke-Chinyama M, *et al.* Community health workers use malaria rapid diagnostic tests (RDTs) safely and accurately: results of a longitudinal study in Zambia. *Am J Trop Med Hyg* 2012;**87**:57–63. doi:10.4269/ajtmh.2012.11-0800
- 15 Boyce MR, Menya D, Turner EL, *et al.* Evaluation of malaria rapid diagnostic test (RDT) use by community health workers: a longitudinal study in western Kenya. *Malar J* 2018;**17**:206. doi:10.1186/s12936-018-2358-6
- 16 Miller JS, Mbusa RK, Baguma S, *et al.* Assessing Village Health Workers' Ability to Perform and Interpret Rapid Diagnostic Tests for Malaria 4 Years after Initial Training: A Cross-Sectional Study. *Am J Trop Med Hyg* Published Online First: 2 November 2020. doi:10.4269/ajtmh.20-0747
- 17 Christiansen TB; Lauritsen JM. *EpiData - Comprehensive Data Management and Basic Statistical Analysis System, Version 3*. Odense Denmark: : EpiData Association <http://www.epidata.dk>
- 18 Harris PA, Taylor R, Thielke R, *et al.* Research electronic data capture (REDCap)—A metadata-driven methodology and workflow process for providing translational research informatics support. *J Biomed Inform* 2009;**42**:377–81. doi:10.1016/j.jbi.2008.08.010
- 19 Hamer DH, Brooks ET, Semrau K, *et al.* Quality and safety of integrated community case management of malaria using rapid diagnostic tests and pneumonia by community health workers. *Pathog Glob Health* 2012;**106**:32–9. doi:10.1179/1364859411y.0000000042
- 20 Miller JS, Patel P, Mian-McCarthy S, *et al.* Usage of and satisfaction with Integrated Community Case Management care in western Uganda: a cross-sectional survey. *Malar J* 2021;**20**:65. doi:10.1186/s12936-021-03601-9

- 1  
2  
3 21 Sinyangwe C, Graham K, Nicholas S, *et al.* Assessing the Quality of Care for Pneumonia in  
4 Integrated Community Case Management: A Cross-Sectional Mixed Methods Study. *PLoS*  
5 *One* 2016;**11**:e0152204. doi:10.1371/journal.pone.0152204  
6  
7  
8 22 Zakus D, Moussa M, Ezechiel M, *et al.* Clinical evaluation of the use of an mhealth  
9 intervention on quality of care provided by Community Health Workers in southwest Niger.  
10 *J Glob Health* 2019;**9**:010812. doi:10.7189/jogh.09.010812  
11  
12 23 Graham K, Sinyangwe C, Nicholas S, *et al.* Rational use of antibiotics by community health  
13 workers and caregivers for children with suspected pneumonia in Zambia: a cross-sectional  
14 mixed methods study. *BMC Public Health* 2016;**16**:897. doi:10.1186/s12889-016-3541-8  
15  
16  
17 24 Munos M, Guiella G, Roberton T, *et al.* Independent Evaluation of the Rapid Scale-Up  
18 Program to Reduce Under-Five Mortality in Burkina Faso. *Am J Trop Med Hyg* Published  
19 Online First: 19 January 2016. doi:10.4269/ajtmh.15-0585  
20  
21  
22 25 Langston A, Wittcoff A, Ngoy P, *et al.* Testing a simplified tool and training package to  
23 improve integrated Community Case Management in Tanganyika Province, Democratic  
24 Republic of Congo: a quasi-experimental study. *J Glob Health* 2019;**9**:010810.  
25 doi:10.7189/jogh.09.010810  
26  
27  
28 26 Boyce SP, Nyangara F, Kamunyori J. A mixed-methods quasi-experimental evaluation of a  
29 mobile health application and quality of care in the integrated community case  
30 management program in Malawi. *J Glob Health* 2019;**9**:010811.  
31 doi:10.7189/jogh.09.010811  
32  
33  
34

35 **Figure 1:** Lowess smoothing plots for correct management over time. Plots A–C correspond to  
36 the first cohort of VHWs. Plot A shows overall correct care over time. Plot B shows correct  
37 referral of patients with a negative malaria rapid diagnostic test (RDT) over time. Plot C shows  
38 overall correct care over time, excluding the error of failing to refer patients with a negative  
39 malaria RDT. Plots D–F depict the second cohort of VHWs. Plot D shows overall correct care  
40 over time. Plot E correct referral of patients with a negative malaria RDT over time. Plot F  
41 shows overall correct care over time, excluding the error of failing to refer patients with a  
42 negative malaria RDT.  
43  
44  
45

46 **Figure 2:** Post-estimation margins plots for GEE logistic regression models with spline knots,  
47 which display the predicted probability of receiving correct care at specified time points (6-  
48 month intervals). Plots A and B depict the first cohort of VHWs. Plot A shows the predicted  
49 probability of overall correct care, with a spline knot 3 years after the first cohort began  
50 providing iCCM care. Plot B shows the predicted probability of overall correct care excluding the  
51 error of failing to refer patients with a negative malaria rapid diagnostic test (RDT), again with a  
52 spline knot at 3 years. Plots C and D depict the second cohort of VHWs. Plot C shows the  
53 predicted probability of overall correct care, with a spline knot 6 months after the second  
54  
55  
56  
57  
58  
59  
60

1  
2  
3 cohort began providing iCCM care. Plot D again shows the predicted probability of overall  
4 correct care, but with a spline knot at 18 months.  
5  
6  
7  
8  
9  
10  
11  
12  
13  
14  
15  
16  
17  
18  
19  
20  
21  
22  
23  
24  
25  
26  
27  
28  
29  
30  
31  
32  
33  
34  
35  
36  
37  
38  
39  
40  
41  
42  
43  
44  
45  
46  
47  
48  
49  
50  
51  
52  
53  
54  
55  
56  
57  
58  
59  
60

For peer review only

1  
2  
3  
4  
5  
6  
7  
8  
9  
10  
11  
12  
13  
14  
15  
16  
17  
18  
19  
20  
21  
22  
23  
24  
25  
26  
27  
28  
29  
30  
31  
32  
33  
34  
35  
36  
37  
38  
39  
40  
41

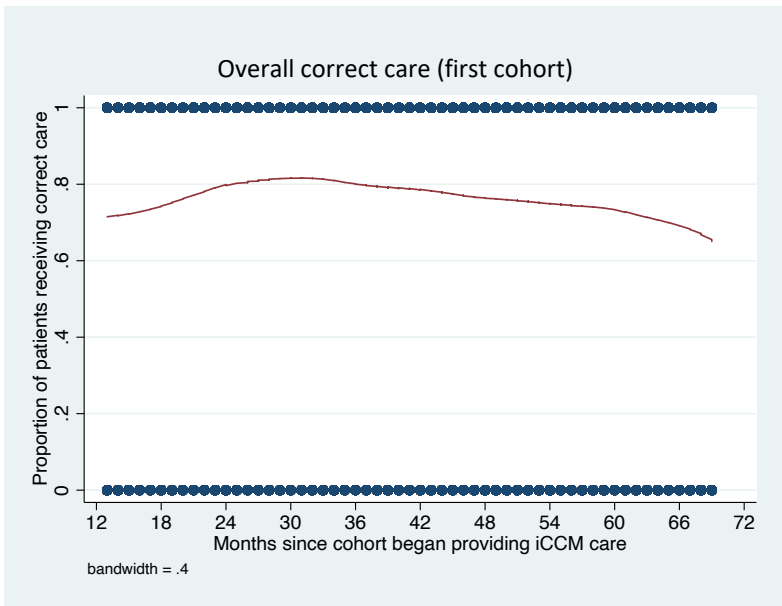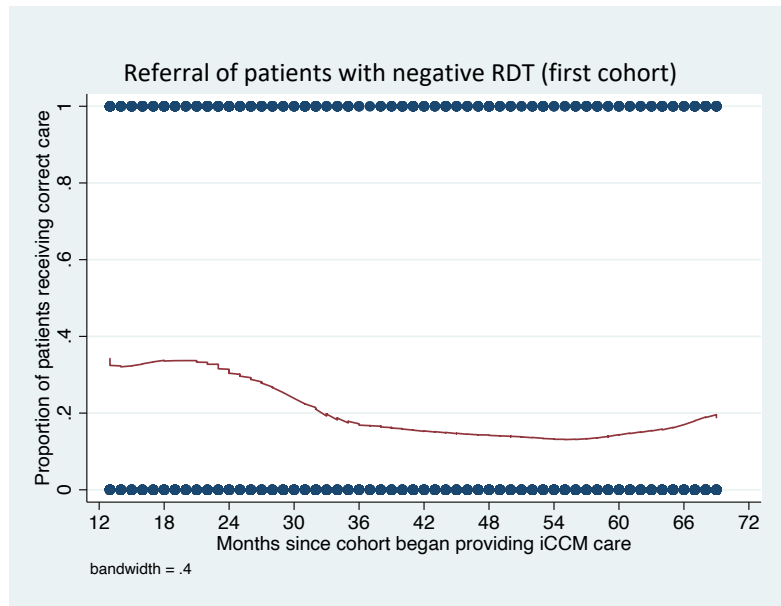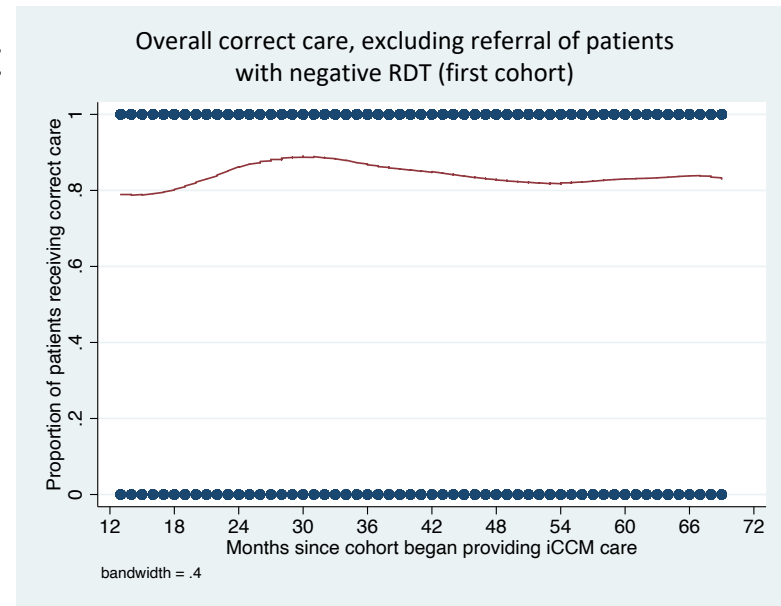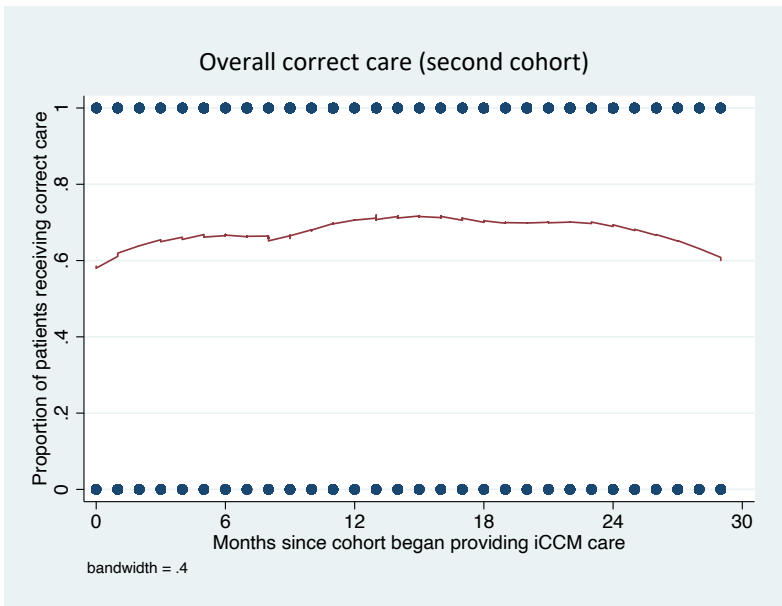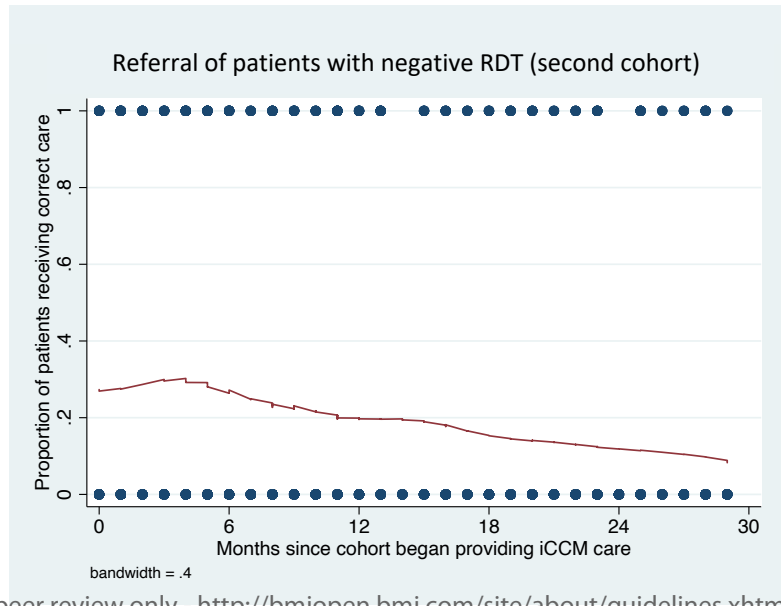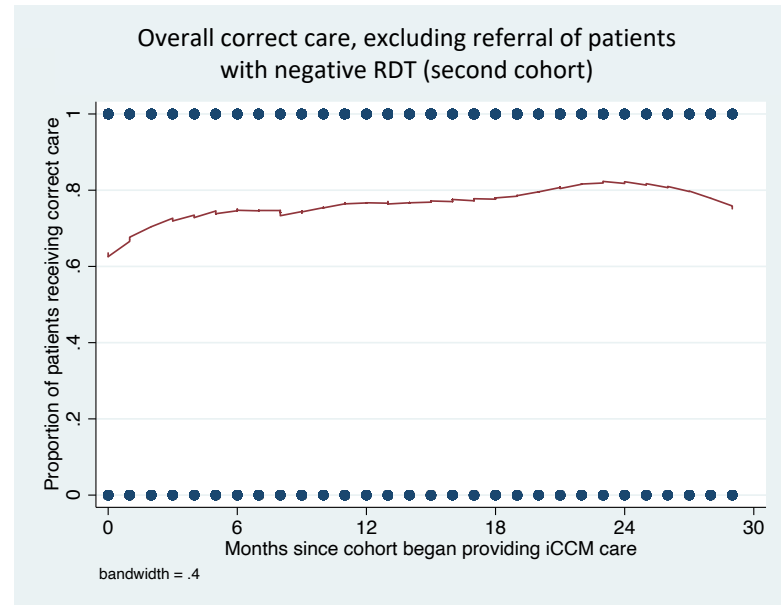

A

Overall correct care, with spline knot at 3 years (first cohort)

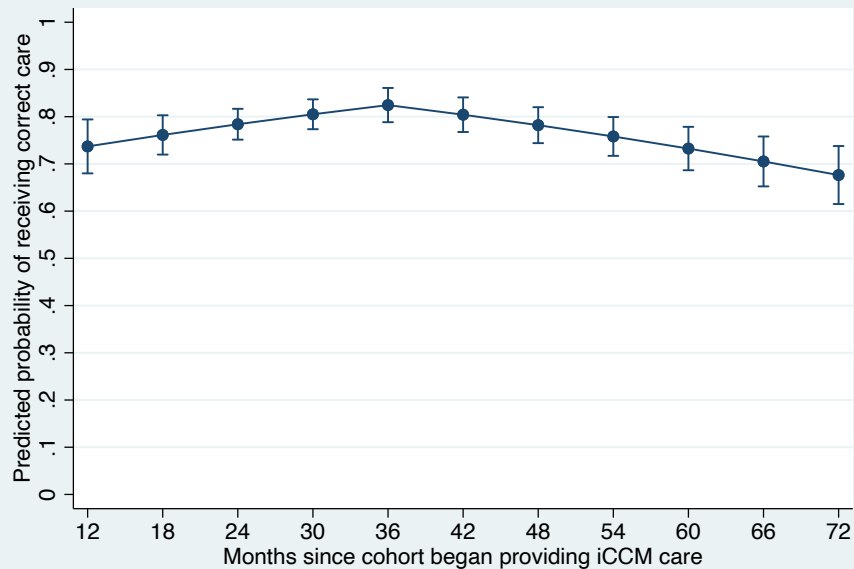

B

Overall correct care excluding referral of patients with negative RDT, with spline knot at 3 years (first cohort)

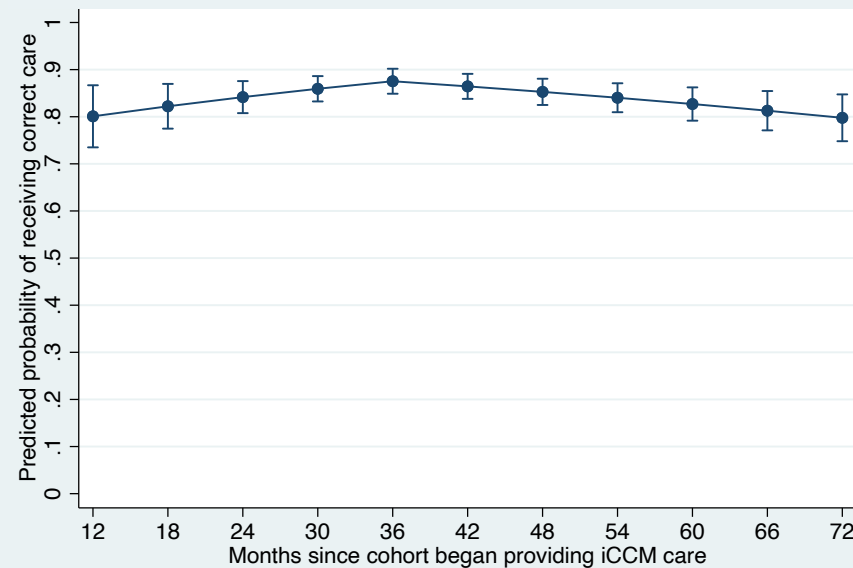

C

Overall correct care, with spline knot at 6 months (second cohort)

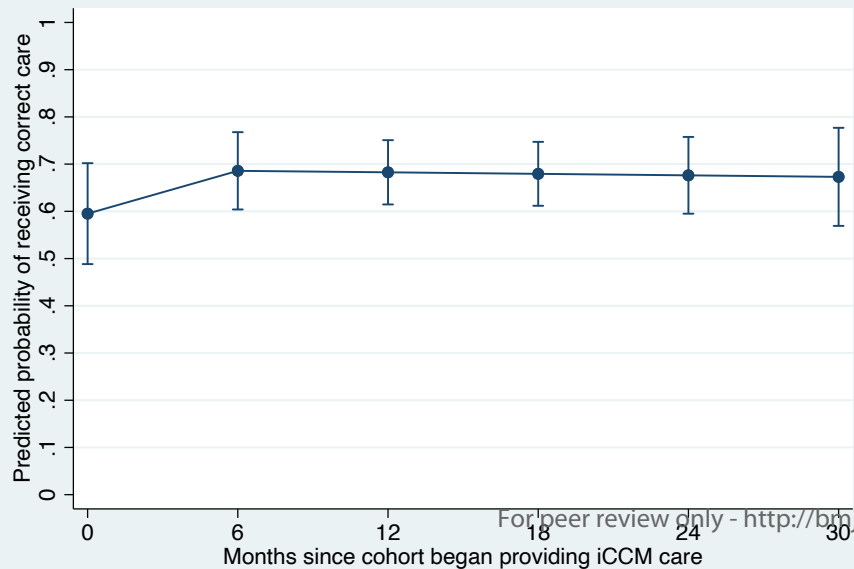

D

Overall correct care, with spline knot at 18 months (second cohort)

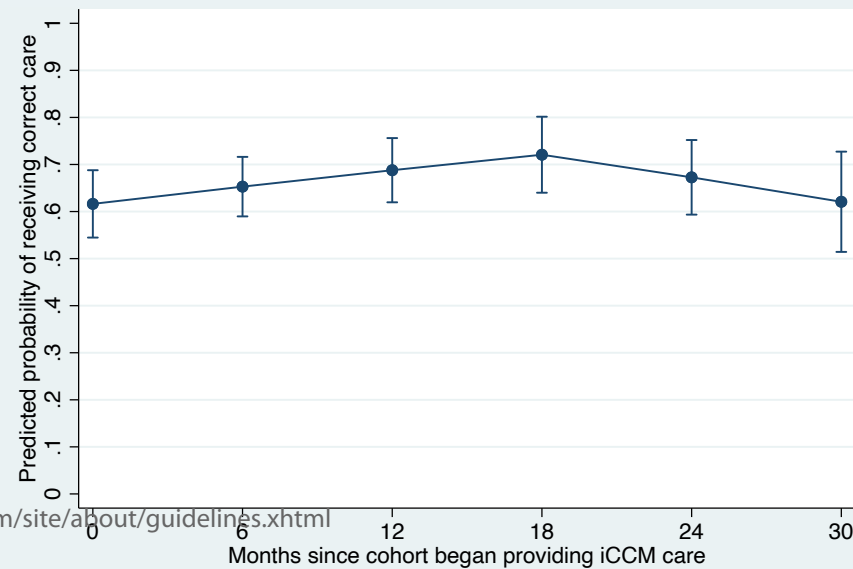

1  
2  
3  
4  
5  
6  
7  
8  
9  
10  
11  
12  
13  
14  
15  
16  
17  
18  
19  
20  
21  
22  
23  
24  
25  
26  
27  
28  
29  
30  
31  
32  
33  
34  
35  
36  
37  
38  
39  
40  
41

STROBE Statement—Checklist of items that should be included in reports of *cohort studies*

|                           | Item No | Recommendation                                                                                                                                                                                                                                                                                                         | Page No |
|---------------------------|---------|------------------------------------------------------------------------------------------------------------------------------------------------------------------------------------------------------------------------------------------------------------------------------------------------------------------------|---------|
| <b>Title and abstract</b> | 1       | (a) Indicate the study's design with a commonly used term in the title or the abstract<br>(b) Provide in the abstract an informative and balanced summary of what was done and what was found                                                                                                                          | 1       |
| <b>Introduction</b>       |         |                                                                                                                                                                                                                                                                                                                        |         |
| Background/rationale      | 2       | Explain the scientific background and rationale for the investigation being reported                                                                                                                                                                                                                                   | 3-4     |
| Objectives                | 3       | State specific objectives, including any prespecified hypotheses                                                                                                                                                                                                                                                       | 4       |
| <b>Methods</b>            |         |                                                                                                                                                                                                                                                                                                                        |         |
| Study design              | 4       | Present key elements of study design early in the paper                                                                                                                                                                                                                                                                | 4       |
| Setting                   | 5       | Describe the setting, locations, and relevant dates, including periods of recruitment, exposure, follow-up, and data collection                                                                                                                                                                                        | 4       |
| Participants              | 6       | (a) Give the eligibility criteria, and the sources and methods of selection of participants. Describe methods of follow-up<br>(b) For matched studies, give matching criteria and number of exposed and unexposed                                                                                                      | 4       |
| Variables                 | 7       | Clearly define all outcomes, exposures, predictors, potential confounders, and effect modifiers. Give diagnostic criteria, if applicable                                                                                                                                                                               | 5       |
| Data sources/measurement  | 8*      | For each variable of interest, give sources of data and details of methods of assessment (measurement). Describe comparability of assessment methods if there is more than one group                                                                                                                                   | 5-6     |
| Bias                      | 9       | Describe any efforts to address potential sources of bias                                                                                                                                                                                                                                                              | 5       |
| Study size                | 10      | Explain how the study size was arrived at                                                                                                                                                                                                                                                                              | n/a     |
| Quantitative variables    | 11      | Explain how quantitative variables were handled in the analyses. If applicable, describe which groupings were chosen and why                                                                                                                                                                                           | n/a     |
| Statistical methods       | 12      | (a) Describe all statistical methods, including those used to control for confounding<br>(b) Describe any methods used to examine subgroups and interactions<br>(c) Explain how missing data were addressed<br>(d) If applicable, explain how loss to follow-up was addressed<br>(e) Describe any sensitivity analyses | 5       |
| <b>Results</b>            |         |                                                                                                                                                                                                                                                                                                                        |         |
| Participants              | 13*     | (a) Report numbers of individuals at each stage of study—eg numbers potentially eligible, examined for eligibility, confirmed eligible, included in the study, completing follow-up, and analysed<br>(b) Give reasons for non-participation at each stage<br>(c) Consider use of a flow diagram                        | 6       |
| Descriptive data          | 14*     | (a) Give characteristics of study participants (eg demographic, clinical, social) and information on exposures and potential confounders<br>(b) Indicate number of participants with missing data for each variable of interest<br>(c) Summarise follow-up time (eg, average and total amount)                         | 6       |
| Outcome data              | 15*     | Report numbers of outcome events or summary measures over time                                                                                                                                                                                                                                                         | 6-7     |



|    |                          |    |                                                                                                                                                                                                              |      |
|----|--------------------------|----|--------------------------------------------------------------------------------------------------------------------------------------------------------------------------------------------------------------|------|
| 1  | Main results             | 16 | (a) Give unadjusted estimates and, if applicable, confounder-adjusted estimates and their precision (eg, 95% confidence interval). Make clear which confounders were adjusted for and why they were included | 9-10 |
| 2  |                          |    | (b) Report category boundaries when continuous variables were categorized                                                                                                                                    |      |
| 3  |                          |    | (c) If relevant, consider translating estimates of relative risk into absolute risk for a meaningful time period                                                                                             |      |
| 4  |                          |    |                                                                                                                                                                                                              |      |
| 5  |                          |    |                                                                                                                                                                                                              |      |
| 6  |                          |    |                                                                                                                                                                                                              |      |
| 7  |                          |    |                                                                                                                                                                                                              |      |
| 8  |                          |    |                                                                                                                                                                                                              |      |
| 9  | Other analyses           | 17 | Report other analyses done—eg analyses of subgroups and interactions, and sensitivity analyses                                                                                                               | 9-10 |
| 10 |                          |    |                                                                                                                                                                                                              |      |
| 11 | <b>Discussion</b>        |    |                                                                                                                                                                                                              |      |
| 12 |                          |    |                                                                                                                                                                                                              |      |
| 13 | Key results              | 18 | Summarise key results with reference to study objectives                                                                                                                                                     | 11   |
| 14 | Limitations              | 19 | Discuss limitations of the study, taking into account sources of potential bias or imprecision. Discuss both direction and magnitude of any potential bias                                                   | 12   |
| 15 |                          |    |                                                                                                                                                                                                              |      |
| 16 | Interpretation           | 20 | Give a cautious overall interpretation of results considering objectives, limitations, multiplicity of analyses, results from similar studies, and other relevant evidence                                   | 12   |
| 17 |                          |    |                                                                                                                                                                                                              |      |
| 18 |                          |    |                                                                                                                                                                                                              |      |
| 19 | Generalisability         | 21 | Discuss the generalisability (external validity) of the study results                                                                                                                                        | 11   |
| 20 |                          |    |                                                                                                                                                                                                              |      |
| 21 | <b>Other information</b> |    |                                                                                                                                                                                                              |      |
| 22 | Funding                  | 22 | Give the source of funding and the role of the funders for the present study and, if applicable, for the original study on which the present article is based                                                | 13   |
| 23 |                          |    |                                                                                                                                                                                                              |      |
| 24 |                          |    |                                                                                                                                                                                                              |      |

\*Give information separately for exposed and unexposed groups.

**Note:** An Explanation and Elaboration article discusses each checklist item and gives methodological background and published examples of transparent reporting. The STROBE checklist is best used in conjunction with this article (freely available on the Web sites of PLoS Medicine at <http://www.plosmedicine.org/>, Annals of Internal Medicine at <http://www.annals.org/>, and Epidemiology at <http://www.epidem.com/>). Information on the STROBE Initiative is available at <http://www.strobe-statement.org>.

# BMJ Open

## Long-term quality of Integrated Community Case Management care for children in Bugoye Subcounty, Uganda: a retrospective observational study

|                                 |                                                                                                                                                                                                                                                                                                                                                                                                                                                                                                                                                                                                                                                                                                                                                                                                                                                                                                                                                                                                                                                                                                                                                                                                                                                                                                                                  |
|---------------------------------|----------------------------------------------------------------------------------------------------------------------------------------------------------------------------------------------------------------------------------------------------------------------------------------------------------------------------------------------------------------------------------------------------------------------------------------------------------------------------------------------------------------------------------------------------------------------------------------------------------------------------------------------------------------------------------------------------------------------------------------------------------------------------------------------------------------------------------------------------------------------------------------------------------------------------------------------------------------------------------------------------------------------------------------------------------------------------------------------------------------------------------------------------------------------------------------------------------------------------------------------------------------------------------------------------------------------------------|
| Journal:                        | <i>BMJ Open</i>                                                                                                                                                                                                                                                                                                                                                                                                                                                                                                                                                                                                                                                                                                                                                                                                                                                                                                                                                                                                                                                                                                                                                                                                                                                                                                                  |
| Manuscript ID                   | bmjopen-2021-051015.R2                                                                                                                                                                                                                                                                                                                                                                                                                                                                                                                                                                                                                                                                                                                                                                                                                                                                                                                                                                                                                                                                                                                                                                                                                                                                                                           |
| Article Type:                   | Original research                                                                                                                                                                                                                                                                                                                                                                                                                                                                                                                                                                                                                                                                                                                                                                                                                                                                                                                                                                                                                                                                                                                                                                                                                                                                                                                |
| Date Submitted by the Author:   | 11-Mar-2022                                                                                                                                                                                                                                                                                                                                                                                                                                                                                                                                                                                                                                                                                                                                                                                                                                                                                                                                                                                                                                                                                                                                                                                                                                                                                                                      |
| Complete List of Authors:       | Miller, James S.; Massachusetts General Hospital; Harvard Medical School<br>Mulogo, Edgar; Mbarara University of Science and Technology Faculty of Medicine, Community health; Bugoye Community Health Collaboration<br>Wesuta, Andrew ; Bugoye Community Health Collaboration ; Global Health Collaborative—MUST Uganda<br>Mumbere, Nobert; Bugoye Community Health Collaboration ; Global Health Collaborative—MUST Uganda<br>Mbaju, Jackson; Bugoye Community Health Collaboration ; Global Health Collaborative—MUST Uganda<br>Matte, Michael; Bugoye Community Health Collaboration ; Global Health Collaborative—MUST Uganda<br>Ntaro, Moses; Mbarara University of Science and Technology Faculty of Medicine, Community health; Bugoye Community Health Collaboration<br>Guiles, Daniel; Indiana University School of Medicine<br>Patel, Palka; Indiana University School of Medicine<br>Bwambale, Shem; Bugoye Health Center; Bugoye Community Health Collaboration<br>Kenney, Jessica; Massachusetts General Hospital; Bugoye Community Health Collaboration<br>Reyes, Raquel ; University of North Carolina at Chapel Hill, 5039 Old Clinic Building, CB 7110, Chapel Hill, 27599, USA., Division of General Medicine & Clinical Epidemiology<br>Stone, Geren; Massachusetts General Hospital; Harvard Medical School |
| <b>Primary Subject Heading</b>: | Global health                                                                                                                                                                                                                                                                                                                                                                                                                                                                                                                                                                                                                                                                                                                                                                                                                                                                                                                                                                                                                                                                                                                                                                                                                                                                                                                    |
| Secondary Subject Heading:      | Health services research, Infectious diseases                                                                                                                                                                                                                                                                                                                                                                                                                                                                                                                                                                                                                                                                                                                                                                                                                                                                                                                                                                                                                                                                                                                                                                                                                                                                                    |
| Keywords:                       | Quality in health care < HEALTH SERVICES ADMINISTRATION & MANAGEMENT, Tropical medicine < INFECTIOUS DISEASES, Community child health < PAEDIATRICS, PRIMARY CARE, Paediatric infectious disease & immunisation < PAEDIATRICS                                                                                                                                                                                                                                                                                                                                                                                                                                                                                                                                                                                                                                                                                                                                                                                                                                                                                                                                                                                                                                                                                                    |
|                                 |                                                                                                                                                                                                                                                                                                                                                                                                                                                                                                                                                                                                                                                                                                                                                                                                                                                                                                                                                                                                                                                                                                                                                                                                                                                                                                                                  |

1  
2  
3  
4  
5  
6  
7  
8  
9  
10  
11  
12  
13  
14  
15  
16  
17  
18  
19  
20  
21  
22  
23  
24  
25  
26  
27  
28  
29  
30  
31  
32  
33  
34  
35  
36  
37  
38  
39  
40  
41  
42  
43  
44  
45  
46  
47  
48  
49  
50  
51  
52  
53  
54  
55  
56  
57  
58  
59  
60



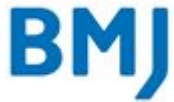

I, the Submitting Author has the right to grant and does grant on behalf of all authors of the Work (as defined in the below author licence), an exclusive licence and/or a non-exclusive licence for contributions from authors who are: i) UK Crown employees; ii) where BMJ has agreed a CC-BY licence shall apply, and/or iii) in accordance with the terms applicable for US Federal Government officers or employees acting as part of their official duties; on a worldwide, perpetual, irrevocable, royalty-free basis to BMJ Publishing Group Ltd ("BMJ") its licensees and where the relevant Journal is co-owned by BMJ to the co-owners of the Journal, to publish the Work in this journal and any other BMJ products and to exploit all rights, as set out in our [licence](#).

The Submitting Author accepts and understands that any supply made under these terms is made by BMJ to the Submitting Author unless you are acting as an employee on behalf of your employer or a postgraduate student of an affiliated institution which is paying any applicable article publishing charge ("APC") for Open Access articles. Where the Submitting Author wishes to make the Work available on an Open Access basis (and intends to pay the relevant APC), the terms of reuse of such Open Access shall be governed by a Creative Commons licence – details of these licences and which [Creative Commons](#) licence will apply to this Work are set out in our licence referred to above.

Other than as permitted in any relevant BMJ Author's Self Archiving Policies, I confirm this Work has not been accepted for publication elsewhere, is not being considered for publication elsewhere and does not duplicate material already published. I confirm all authors consent to publication of this Work and authorise the granting of this licence.

1  
2  
3 **Long-term quality of Integrated Community Case Management care for children in Bugoye**  
4 **Subcounty, Uganda: a retrospective observational study**  
5

6  
7 James S. Miller<sup>1,2\*</sup>, Edgar Mugema Mulogo<sup>3,4\*</sup>, Andrew Christopher Wesuta<sup>4,5</sup>, Nobert  
8 Mumbere<sup>4,5</sup>, Jackson Mbaju<sup>4,5</sup>, Michael Matte<sup>4,5</sup>, Moses Ntaro<sup>3,4</sup>, Daniel A. Guiles<sup>6</sup>, Palka R.  
9 Patel<sup>6</sup>, Shem Bwambale<sup>4,7</sup>, Jessica Kenney<sup>1,4</sup>, Raquel Reyes<sup>8</sup>, and Geren S. Stone<sup>1,2</sup>  
10

11  
12 \*These authors contributed equally to this work  
13

14 Corresponding author: James S. Miller, MGH Global Health, 125 Nashua Street, Suite 722,  
15 Boston, MA 02114, USA; jsmiller@post.harvard.edu  
16

17  
18 <sup>1</sup>Massachusetts General Hospital

19 <sup>2</sup>Harvard Medical School

20 <sup>3</sup>Mbarara University of Science and Technology

21 <sup>4</sup>Bugoye Community Health Collaboration

22 <sup>5</sup>Global Health Collaborative—MUST Uganda

23 <sup>6</sup>Indiana University School of Medicine

24 <sup>7</sup>Bugoye Health Center

25 <sup>8</sup>University of North Carolina School of Medicine  
26  
27

28  
29 **Word count:** 4874  
30

31 **Keywords:** Village health workers, Integrated Community Case Management, quality of health  
32 care, Uganda  
33  
34  
35  
36  
37  
38  
39  
40  
41  
42  
43  
44  
45  
46  
47  
48  
49  
50  
51  
52  
53  
54  
55  
56  
57  
58  
59  
60

## Abstract

**Objectives:** Integrated community case management (iCCM) of childhood illness in Uganda involves protocol-based care of malaria, pneumonia, and diarrhea for children under 5 years old. This study assessed volunteer village health workers' (VHW) ability to provide correct iCCM care according to the national protocol and change in their performance over time since initial training.

**Setting:** VHWs affiliated with the Ugandan national program provide community-based care in 8 villages in Bugoye Subcounty, a rural area in Kasese District. The first cohort of VHWs began providing iCCM care in March 2013, the second cohort in July 2016.

**Participants:** All children receiving iCCM care in 18,430 clinical encounters occurring between April 2014–December 2018.

**Primary and secondary outcome measures:** The descriptive primary outcome measure was the proportion of patients receiving overall correct care, defined as adherence to the iCCM protocol for the presenting condition (hereafter quality of care). The analytic primary outcome was change in the odds of receiving correct care over time, assessed using logistic regression models with generalized estimating equations. Secondary outcome measures included a set of binary measures of adherence to specific elements of the iCCM protocol. Pre-planned and final measures were the same.

**Results:** Overall, VHWs provided correct care in 74% of clinical encounters. For the first cohort of VHWs, regression modeling demonstrated a modest increase in quality of care until approximately 3 years after their initial iCCM training (OR 1.022 per month elapsed, 95% CI 1.005–1.038), followed by a modest decrease thereafter (OR 0.978 per month, 95% CI 0.970–0.986). For the second cohort, quality of care was essentially constant over time (OR 1.007 per month, 95% CI 0.989–1.025).

**Conclusions:** Quality of care was relatively constant over time, though the trend toward decreasing quality of care after 3 years of providing iCCM care requires further monitoring.

### Strengths and limitations of this study

- We used a record review approach to examine quality of care for all Integrated Community Case Management clinical encounters over a nearly 5-year period
- A retrospective record review approach cannot assess all aspects of appropriate care, and may overestimate quality of care
- While this study assessed a large number of patient encounters, it included a fairly small number of VHWs in a single geographic area, limiting its generalizability

## INTRODUCTION

In integrated community case management (iCCM) of childhood illness, village health workers (VHW) or other lay workers provide care for pediatric malaria, pneumonia, and (in some settings) diarrhea, usually in a community setting rather than at a health facility[1]. VHWs follow a defined protocol that directs specific diagnostic and therapeutic steps based on the patient's presenting complaint and clinical exam findings. In some parts of Uganda, volunteer VHWs provide iCCM care, either in the patient's home or at the VHW's home, as part of the national Village Health Teams system[2–4]. These VHWs also retain their existing roles in health promotion efforts. In Bugoye Subcounty, Uganda, a rural, mountainous area in Kasese District (on the western border of Uganda), VHWs from the national program have provided iCCM care since 2013, with financial and operational support from a longstanding collaboration with Mbarara University of Science and Technology (Mbarara, Uganda) and the Massachusetts General Hospital (Boston, Massachusetts, USA).

Prior studies have employed several different approaches to assess iCCM quality of care, including direct observation of VHWs (with or without reexamination of the patient by a trained clinician), review of VHWs' clinical records, case scenarios, and surveys of patients' caregivers. Each approach comes with certain risks of bias and with different ability to measure the varied aspects of quality of care. Direct observation of VHWs with reexamination of patients allows for the most comprehensive assessment of quality of care, though the presence of an observer may alter VHWs' clinical practice (Hawthorne effect). A record review approach cannot assess all elements of quality of care and measures quality of recorded care rather than quality of actual care. However, record review has the benefit of easier repeated or widespread implementation. Prior studies comparing different methods of assessing quality of iCCM care, with direct observation of VHWs and reexamination of patients as the gold standard, have found that record review, case scenarios, and direct observation alone all tend to overestimate quality of care somewhat[5,6]. While acknowledging that limitation, in this study we employ a record review approach because it feasibly allows for continuous assessment of quality of care over multiple years.

In Uganda, prior studies using direct observation[7], record review[8], surveys of caregivers[9], and a combination of approaches[10] have generally demonstrated high quality of iCCM care, within the limits of each approach. In other countries in Sub-Saharan Africa, some studies have found similar quality of care[11,12], while others documented lower quality of care overall[13] or for specific areas such as severe illness[14] or antibiotic overuse[15]. However, there are few evaluations examining changes in iCCM care quality over time; most studies have assessed quality of care at a point in time or cumulatively for a single time period, or examined the impact of a particular intervention[7–15].

One prior study in Kenya examined quality of care at multiple time points using direct observation of VHWs and reexamination of patients, with 3 evaluations conducted over the 4-year period after VHWs' initial iCCM training. This study demonstrated improvement in some quality measures and worsening of other measures over time but did not assess for an overall trend in quality of care over time[16]. We previously examined trends in quality of care over the



1  
2  
3 first 2 years of the iCCM program in Bugoye using a record review approach, showing  
4 improvement in the proportions of patients receiving correct care (quality of care) over the  
5 initial 6 months after iCCM care initiation and stable quality of care for the remaining 18  
6 months[17]. Several other studies have examined quality of care provided by VHWs with  
7 differing levels of experience but did not examine the relationship between experience level  
8 and quality of care provided[18,19]. Prior studies in Bugoye and other settings have also  
9 examined the specific iCCM skills of performing and interpreting rapid diagnostic tests (RDT) for  
10 malaria, finding that VHWs are able to maintain these skills over a 1–4 year period[20–22].  
11  
12  
13

14 Since iCCM programs provide frontline care for common but potentially fatal childhood  
15 illnesses, programs must be able to monitor and ensure quality of care over time. Here we  
16 describe quality of iCCM care over a nearly 5-year period, as VHWs gain clinical experience but  
17 are also further from their initial iCCM training.  
18  
19  
20

## 21 **METHODS**

### 22 **Study design**

23  
24 In this retrospective, observational study, we examined overall iCCM quality of care as well as  
25 specific components of iCCM care for two cohorts of VHWs using a record review approach for  
26 all clinical encounters occurring between April 2014–December 2018. For each cohort we also  
27 examined trends in quality of care over time. For the first cohort of VHWs, we sought to assess  
28 long-term trends in quality of care, building on the prior evaluation of the first 2 years of iCCM  
29 care provided by this cohort[17]. For the second cohort of VHWs, we sought to assess quality of  
30 care over the initial 2.5 years of iCCM care provided by this cohort, using a larger dataset of all  
31 clinical encounters rather than sampled encounters to further evaluate our prior findings on  
32 quality of iCCM care after initial training.  
33  
34  
35  
36

37 The descriptive primary outcome measure was the proportion of patients receiving overall  
38 correct care, defined as adherence to all elements of the iCCM protocol for the presenting  
39 condition (further description of the iCCM protocol is provided below). We have termed this  
40 outcome measure quality of care, acknowledging that a retrospective record review approach  
41 cannot assess all domains of quality of care. The analytic primary outcome measure examined  
42 trends over time in quality of care, again using a binary classification of overall correct or  
43 incorrect care. Secondary outcome measures also used a binary correct or incorrect  
44 classification, and included VHWs' adherence to correct diagnostic protocol, correct prescribing  
45 practices, and correct referral of patients to a health facility. Pre-planned and final measures  
46 were the same.  
47  
48  
49

### 50 **Study setting**

51 VHWs in Bugoye are selected by community members in their villages as part of the national  
52 Village Health Teams program and serve their communities as part-time volunteers. In general,  
53 VHWs are working age adults and have a paid job or practice subsistence farming, sometimes  
54 with an additional cash crop such as coffee, in addition to their work as VHWs. All VHWs are  
55  
56  
57  
58  
59

1  
2  
3 required to have achieved basic literacy, and most have completed primary school. In addition  
4 to iCCM care, VHWs also provide health education and collect demographic and health data. All  
5 VHWs received 3 days of initial general training, 5 days of initial iCCM training, and half-day  
6 refresher trainings on a quarterly basis throughout the time period examined here. Clinical staff  
7 members at the government-funded health center in Bugoye are trained as iCCM instructors (as  
8 part of a Ministry of Health-supported training of trainers approach) and lead the quarterly  
9 training sessions as well as providing field-based individual supervision. VHWs provide iCCM  
10 care for malaria, pneumonia, and diarrhea in children between 2 months and 5 years old. In  
11 keeping with World Health Organization/UNICEF standards, VHWs perform rapid diagnostic  
12 tests for malaria (RDT) and provide artemisinin combination therapy (ACT) if indicated, measure  
13 respiratory rate and treat presumed pneumonia with amoxicillin, and evaluate children with  
14 diarrhea and treat with oral rehydration solution (ORS) and zinc, as well as assessing children  
15 for signs of severe illness (danger signs) and providing health education[1]. VHWs refer children  
16 with other conditions or with danger signs to a health facility. The first cohort (24 VHWs) began  
17 providing iCCM care in March 2013 in 5 villages; one VHW was added in 2016 to replace a VHW  
18 who had moved away. The second cohort (14 VHWs) began providing iCCM care in July 2016 in  
19 3 additional villages. Both cohorts received the same initial training, refresher trainings, and  
20 supervision. In this program, Mbarara University of Science and Technology and Massachusetts  
21 General Hospital fund program administration and the purchase medications and malaria rapid  
22 diagnostic tests as well as providing staff support to enhance data collection and quality  
23 improvement efforts. During the time period examined here, iCCM care had not yet been  
24 implemented throughout the national Village Health Teams program.

### 31 **Data collection**

32 During the time period assessed in this study, VHWs in Bugoye used a paper form to record  
33 information from each clinical encounter. The form used was based on a Ministry of Health  
34 template and was modified to address local context and translated into the local language of  
35 Lukonjo. At the end of each month, program staff collected the paper records and entered  
36 information from each clinical encounter into a customized Epidata form[23] (implemented  
37 separately from national reporting systems) and stored in a Research Electronic Data Capture  
38 (REDCap) database[24]. The paper record forms contain basic information about the patient  
39 (age, sex, presenting complaints), clinical assessment data (presence of danger signs,  
40 respiratory rate, and malaria rapid diagnostic test result), and actions taken (medications  
41 administered and/or referral to the health facility).

42  
43  
44  
45  
46 Deidentified data for all encounters from April 2014–December 2018 (reflecting all available  
47 months in the electronic clinical database) were extracted to create the research dataset used  
48 for this study. Data were then cleaned, with comparison to paper records in case of a mismatch  
49 between similar variables (e.g., report month and visit date) or other suspected inaccuracies.  
50 Infants under 2 months of age were excluded from analysis as they were likely seen for  
51 newborn wellness checks separate from iCCM care. Stata Version 15 (StataCorp, College  
52 Station, TX) was used to check for presumed duplicate entries in the database. Decision rules in  
53 Stata were used to determine whether the care each patient received (based on the paper  
54 record form) matched with correct care according to the iCCM protocol. For patients presenting  
55  
56  
57  
58  
59  
60

1  
2  
3 with fever, elements of correct care include performing a rapid diagnostic test for malaria and  
4 recording the result, treatment with artemisinin combination therapy if the test is positive, and  
5 referral to a health facility if the test is negative. For patients presenting with cough/fast  
6 breathing, elements of correct care include measuring and recording the respiratory rate and  
7 treatment with oral amoxicillin if the respiratory rate is above age-based cutoffs (based on  
8 patients' recorded age and respiratory rate we could assess whether the VHW made this  
9 determination appropriately). For patients presenting with diarrhea, correct care constituted  
10 treatment with oral rehydration solution (ORS) and zinc. For patients recorded as having danger  
11 signs, we assessed whether the patient was referred to a health facility and received  
12 appropriate pre-referral treatment (if indicated). Certain elements of correct care (e.g.,  
13 medication dosage, specific elements of health education provided) could not be assessed  
14 because they are not included on the paper record form.  
15  
16  
17  
18

### 19 **Data analysis**

20 The analytic methods for this study are quite similar to our prior study of iCCM care quality over  
21 the initial 2 years of this program[17]. In addition to the measures above, we also calculated the  
22 proportion of VHWs providing high-quality care for each of the main iCCM conditions, using  
23 thresholds of 70% and 84% of encounters with correct care. These thresholds were chosen to  
24 accord with our prior findings which employed a lot quality assurance sampling approach[17].  
25 Since failure to refer a patient with subjective fever and a negative RDT was a common and  
26 likely low-consequence error[11], we also calculated the overall proportion of patients  
27 receiving correct care if this error is excluded.  
28  
29  
30

31 We assessed population average trends in quality of care over time using logistic regression  
32 models with generalized estimating equations (GEE) with an exchangeable correlation structure  
33 and with robust standard errors to account for clustering by VHW, but otherwise without  
34 adjustment for demographic variables. For this analysis, we used a binary outcome variable  
35 representing correct or incorrect care according to the iCCM protocol, with time in months  
36 since the VHW began providing iCCM care as the exposure variable, to examine changes in the  
37 odds of receiving correct care over time. For each cohort, we initially fit a base model without a  
38 spline. Based on graphical depiction of the data as well as our prior findings suggesting that  
39 quality of care improved over the initial 6 months of providing iCCM care[17], we then fit  
40 models that included a spline, as the relationship between experience, i.e., time providing iCCM  
41 care, and provision of correct care might not be constant (e.g., provision of correct care might  
42 initially improve with experience but eventually reach a point at which further experience does  
43 not correlate with further improvement). We used the quasi-likelihood under the  
44 independence criterion (QIC) to compare model fit between the models with and without  
45 splines. The VHW who joined the program later in a village from the first cohort was excluded  
46 from this portion of analysis.  
47  
48  
49  
50

### 51 **Ethics approval**

52 Ethical approval for this study was granted by the Partners Healthcare IRB and the Research  
53 Ethics Committee at the Mbarara University of Science and Technology. Because the study  
54  
55  
56  
57  
58  
59  
60

involved only analysis of deidentified clinical records, individual patients' caregivers were not consented for the study.

### Patient and public involvement

While patients' families were not directly involved in developing the research question or outcome measures for this study, community members play a key role in selecting the VHWs who provide care in their communities. In a separate study we have also sought to understand families' experience of and satisfaction with iCCM care to identify program strengths and areas for improvement[25]. Evaluation of iCCM quality of care has also helped tailor the content of VHW refresher trainings and other quality improvement efforts.

### RESULTS

After exclusion of 48 encounters for children under 2 months old and 339 presumed duplicate entries, VHWs completed a total of 18,430 clinical encounters between April 2014–December 2018. VHWs in the first cohort accounted for 74% of these encounters (Table 1). Because the data are deidentified and do not contain a unique identifier variable like a medical record number, it was not possible to determine how many unique children received care from a VHW during this period. For brevity, hereafter we refer to “patients” rather than clinical encounters. The proportion of female patients and mean age of patients were similar between the first cohort and second cohort of VHWs. Subjective fever was the most common presenting complaint, followed by cough/fast breathing, and then diarrhea (59%, 45%, and 28%, respectively; percentages add to >100% because some patients presented with multiple complaints). In both cohorts, 1% of patients were noted to have danger signs.

Table 1: Patient demographic information and summary of all Integrated Community Case Management clinical encounters (April 2014–December 2018 for first cohort VHWs, July 2016–December 2018 for second cohort VHWs)

| Measure                         | n (%) or mean (range) |                    |              |
|---------------------------------|-----------------------|--------------------|--------------|
|                                 | First cohort VHWs     | Second cohort VHWs | Overall      |
| Total encounters*               | 13,650 (74%)          | 4,780 (26%)        | 18,430       |
| Female                          | 6,780 (50%)           | 2,325 (49%)        | 9,105 (49%)  |
| Age in months**                 | 28.5 (2–60)           | 27.0 (2–60)        | 28.1 (2–60)  |
| <i>Presenting complaints***</i> |                       |                    |              |
| Fever                           | 8,418 (62%)           | 2,394 (50%)        | 10,812 (59%) |
| Cough/fast breathing            | 5,890 (43%)           | 2,449 (51%)        | 8,339 (45%)  |
| Diarrhea                        | 3,818 (28%)           | 1,352 (28%)        | 5,170 (28%)  |
| Other/not recorded              | 600 (4%)              | 149 (3%)           | 749 (4%)     |
| Patients with danger signs      | 171 (1%)              | 58 (1%)            | 229 (1%)     |
| <i>Actions/outcomes</i>         |                       |                    |              |
| Respiratory rate measured       | 6,377 (47%)           | 2,472 (52%)        | 8,849 (48%)  |
| Respiratory rate elevated       | 5,756 (90%)           | 2,293 (93%)        | 8,049 (91%)  |
| RDT performed                   | 9,316 (68%)           | 2,715 (57%)        | 12,031 (65%) |

|                                         |             |             |             |
|-----------------------------------------|-------------|-------------|-------------|
| RDT positive                            | 7,060 (76%) | 1,719 (63%) | 8,779 (73%) |
| Patients treated with ACT               | 7,022 (51%) | 1,706 (36%) | 8,728 (47%) |
| Patients treated with amoxicillin       | 5,972 (44%) | 2,457 (51%) | 8,429 (46%) |
| Patients treated with ORS and zinc      | 3,841 (28%) | 1,331 (28%) | 5,172 (28%) |
| Patients treated with rectal artesunate | 95 (1%)     | 38 (1%)     | 133 (1%)    |
| Patients referred to health facility    | 783 (6%)    | 303 (6%)    | 1,086 (6%)  |
| Medication reactions                    | 2 (0.01%)   | 0 (0%)      | 2 (0.01%)   |
| Deaths                                  | 1 (0.01%)   | 1 (0.02%)   | 2 (0.01%)   |

Abbreviations: ACT, artemisinin combination therapy; ORS, oral rehydration solution; RDT, rapid diagnostic test for malaria; VHW, village health worker

\*339 presumed duplicate encounters as well as 76 encounters with no clinical information recorded are excluded from the analysis

\*\*48 infants under 2 months of age were excluded from the analysis as they were likely seen for newborn assessments rather than iCCM care

\*\*\*Percentages add to >100%, as some patients presented with multiple complaints

For patients with measured respiratory rate, 91% had a respiratory rate above age-based cutoffs. VHWs performed a total of 12,031 malaria RDTs, of which 8,879 (73%) were positive. There were 8,728 patients treated with ACT, 8,429 patients treated with amoxicillin, and 5,172 patients treated with oral rehydration salts and zinc. Higher proportions of patients treated by VHWs in the first cohort presented with fever (62% vs. 50%), received an RDT (68% vs. 57%), and had positive RDTs (76% vs. 63%). Correspondingly, a higher proportion of patients treated by VHWs in the first cohort received ACT (51% vs. 36%). There were 133 patients (1%) treated with rectal artesunate, and 1,086 (6%) referred to a health facility. There were 2 patients recorded as having adverse reactions to medications, and 2 recorded deaths (Table 1).

Regarding quality measures, 97% of patients presenting with subjective fever correctly received an RDT (98% of those treated by VHWs in the first cohort vs. 94% of those treated by VHWs in the second cohort). Of patients diagnosed with malaria by RDT, 93% received correct management (94% vs. 88%). However, of patients with a negative RDT, only 23% were appropriately referred to a health facility (21% vs. 26%). Of patients presenting with cough or subjective fast breathing, 96% had their respiratory rate recorded (97% vs. 94%). Of those with an elevated respiratory rate and thus presumed pneumonia based on the iCCM algorithm, 90% received correct treatment (92% vs. 90%). Of patients with danger signs, 77% were appropriately referred to a health facility (80% vs 69%), and 60% received appropriate pre-referral treatment (56% vs. 72%); see Table 2.

Table 2: Integrated Community Case Management quality of care measures

| Measure                                         | First cohort VHWs<br>n (%) | Second cohort VHWs<br>n (%) | Overall<br>n (%) |
|-------------------------------------------------|----------------------------|-----------------------------|------------------|
| RDT performed for patient presenting with fever | 8,278 (98%)                | 2,258 (94%)                 | 10, 536 (97%)    |
| Malaria patients receiving correct management   | 6,864 (94%)                | 1,617 (88%)                 | 8,481 (93%)      |

|    |                                                                                                               |              |             |              |
|----|---------------------------------------------------------------------------------------------------------------|--------------|-------------|--------------|
| 1  |                                                                                                               |              |             |              |
| 2  |                                                                                                               |              |             |              |
| 3  |                                                                                                               |              |             |              |
| 4  | Patients with negative RDT receiving correct management                                                       | 323 (21%)    | 172 (26%)   | 495 (23%)    |
| 5  |                                                                                                               |              |             |              |
| 6  | Respiratory rate recorded for patient presenting with cough or subjective fast breathing                      | 5,693 (97%)  | 2,305 (94%) | 7,998 (96%)  |
| 7  |                                                                                                               |              |             |              |
| 8  | Patients with elevated respiratory rate receiving correct treatment                                           | 5,625 (92%)  | 2,200 (86%) | 7,825 (90%)  |
| 9  |                                                                                                               |              |             |              |
| 10 | Patients with diarrhea receiving ORS and zinc                                                                 | 3,699 (92%)  | 1,281 (90%) | 4,980 (92%)  |
| 11 |                                                                                                               |              |             |              |
| 12 |                                                                                                               |              |             |              |
| 13 | Patients inappropriately treated with ACT (out of total patients)                                             | 182 (1%)     | 100 (2%)    | 282 (2%)     |
| 14 |                                                                                                               |              |             |              |
| 15 | Inappropriate ACT prescriptions (out of total ACT prescriptions)                                              | 182 (3%)     | 100 (6%)    | 282 (3%)     |
| 16 |                                                                                                               |              |             |              |
| 17 | Patients inappropriately treated with amoxicillin (out of total patients)                                     | 343 (3%)     | 256 (5%)    | 599 (3%)     |
| 18 |                                                                                                               |              |             |              |
| 19 | Inappropriate amoxicillin prescriptions (out of total amoxicillin prescriptions)                              | 343 (6%)     | 256 (10%)   | 599 (7%)     |
| 20 |                                                                                                               |              |             |              |
| 21 | Patients inappropriately treated with ORS, zinc, or both (out of total patients)                              | 188 (1%)     | 73 (2%)     | 261 (1%)     |
| 22 |                                                                                                               |              |             |              |
| 23 | Inappropriate ORS or zinc prescriptions (out of total ORS and zinc prescriptions)                             | 188 (5%)     | 73 (5%)     | 261 (5%)     |
| 24 |                                                                                                               |              |             |              |
| 25 |                                                                                                               |              |             |              |
| 26 | Patients with danger signs appropriately referred to health facility                                          | 137 (80%)    | 40 (69%)    | 177 (77%)    |
| 27 |                                                                                                               |              |             |              |
| 28 | Patients with danger signs receiving appropriate pre-referral treatment                                       | 96 (56%)     | 42 (72%)    | 138 (60%)    |
| 29 |                                                                                                               |              |             |              |
| 30 |                                                                                                               |              |             |              |
| 31 | Patients receiving overall correct management (all months)*                                                   | 10,455 (77%) | 3,244 (68%) | 13,699 (74%) |
| 32 |                                                                                                               |              |             |              |
| 33 | Patients receiving overall correct management (July 2016 - December 2018)                                     | 5,560 (75%)  | 3,244 (68%) | 8,804 (72%)  |
| 34 |                                                                                                               |              |             |              |
| 35 | Patients receiving overall correct management, excluding referral of patients with negative RDT (all months)* | 11,486 (84%) | 3,654 (76%) | 15,140 (82%) |
| 36 |                                                                                                               |              |             |              |
| 37 |                                                                                                               |              |             |              |
| 38 |                                                                                                               |              |             |              |
| 39 |                                                                                                               |              |             |              |
| 40 |                                                                                                               |              |             |              |
| 41 |                                                                                                               |              |             |              |
| 42 |                                                                                                               |              |             |              |
| 43 |                                                                                                               |              |             |              |

Abbreviations: ACT, artemisinin combination therapy; ORS, oral rehydration solution; RDT, rapid diagnostic test for malaria; VHW, village health worker

\*April 2014 - December 2018 for original VHWs; July 2016 - December 2018 for expansion VHWs

Overall, 74% of patients received correct management (77% vs. 68%). When comparing only the time period in which the second cohort of VHWs was providing iCCM care, 72% of patients received correct management (75% vs 68%). Excluding the common error of failing to refer patients with a negative malaria RDT, 82% of patients received correct management (84% vs 76%).



Inappropriate use of medications was fairly low, with 2% of patients receiving ACT inappropriately, 3% of patients receiving amoxicillin inappropriately, and 1% of patients receiving ORS, zinc, or both inappropriately (Table 2). This constituted 3%, 7%, and 5% of prescriptions for those medications, respectively. These proportions were similar between the two cohorts of VHWs.

Regarding individual VHWs' performance, of the 38 VHWs, all 38 VHWs provided correct care for at least 70% of patients with malaria, and 34 VHWs provided correct care for least 84% of patients with malaria, compared with 35 and 30 VHWs (respectively) for patients with presumed pneumonia, 36 and 29 VHWs (respectively) for patients with diarrhea, and 24 and 7 VHWs (respectively) for all patients. If failure to refer patients with a negative RDT is excluded, then 35 VHWs met the 70% threshold for overall correct care, and 16 VHWs met the 84% threshold for overall correct care (Table 3).

Table 3: Village health worker-level quality of care measures

| Measure                                                                               | In >70% of encounters<br>n (%)* | In >84% of encounters<br>n (%)* |
|---------------------------------------------------------------------------------------|---------------------------------|---------------------------------|
| VHWs providing correct care for malaria                                               | 38 (100%)                       | 34 (89%)                        |
| VHWs providing correct care for presumed pneumonia                                    | 35 (92%)                        | 30 (79%)                        |
| VHWs providing correct care for diarrhea                                              | 36 (95%)                        | 29 (76%)                        |
| VHWs providing overall correct care                                                   | 24 (63%)                        | 7 (18%)                         |
| VHWs providing overall correct care, excluding referral of patients with negative RDT | 35 (92%)                        | 16 (42%)                        |

Abbreviations: RDT, rapid diagnostic test for malaria; VHW, village health worker

\*The 70% and 84% thresholds were chosen to accord with our prior lot quality assurance sampling approach, allowing for comparison between the two studies

For the first cohort of VHWs, modelling time as a continuous variable (months since the cohort began providing iCCM care) estimated a 0.6% decreased odds of correct care for each month (OR 0.994, 95% CI 0.988-0.999,  $p=0.032$ ). Graphical depiction of overall correct care over time for the first cohort appeared to show a gradual increase until approximately March 2016 (3 years after iCCM care initiation), followed by gradual decrease (Figure 1). Based on the graphical depiction, the addition of a spline knot at the 3-year mark demonstrated a slight trend toward increasing correctness of care up until the 3-year mark (OR 1.022, 95% CI 1.005-1.038,  $p=0.009$ ), followed by decreasing correctness of care after that point (OR 0.978, 95% CI 0.970-0.986,  $p<0.001$ ), with an improvement in model fit based on the QIC values (Table 4).

Table 4: GEE logistic regression models for quality of care over time

| Measure                                          | OR | 95% CI | p-value | Model QIC* |
|--------------------------------------------------|----|--------|---------|------------|
| <i>First cohort VHWs, overall correct care**</i> |    |        |         | 14587      |



|    |                                                                                                                                                           |       |             |        |       |
|----|-----------------------------------------------------------------------------------------------------------------------------------------------------------|-------|-------------|--------|-------|
| 1  |                                                                                                                                                           |       |             |        |       |
| 2  |                                                                                                                                                           |       |             |        |       |
| 3  | Months since iCCM services initiation                                                                                                                     | 0.994 | 0.988–0.999 | 0.032  |       |
| 4  |                                                                                                                                                           |       |             |        |       |
| 5  | <i>First cohort VHWs, overall correct care, with spline knot at 3 years after iCCM care initiation**</i>                                                  |       |             |        | 14524 |
| 6  | Months since iCCM services initiation - Months 14–36                                                                                                      | 1.022 | 1.005–1.038 | 0.009  |       |
| 7  | Months since iCCM services initiation - Months 36–70                                                                                                      | 0.978 | 0.970–0.986 | <0.001 |       |
| 8  |                                                                                                                                                           |       |             |        |       |
| 9  |                                                                                                                                                           |       |             |        |       |
| 10 | <i>First cohort VHWs, overall correct care excluding referral of patients with negative RDT**</i>                                                         |       |             |        | 11747 |
| 11 | Months since iCCM services initiation                                                                                                                     | 0.999 | 0.993–1.004 | 0.632  |       |
| 12 |                                                                                                                                                           |       |             |        |       |
| 13 | <i>First cohort VHWs, overall correct care excluding referral of patients with negative RDT, with spline knot at 3 years after iCCM care initiation**</i> |       |             |        | 11718 |
| 14 |                                                                                                                                                           |       |             |        |       |
| 15 | Months since iCCM services initiation - Months 14–36                                                                                                      | 1.023 | 1.005–1.043 | 0.015  |       |
| 16 | Months since iCCM services initiation - Months 36–70                                                                                                      | 0.984 | 0.976–0.993 | <0.001 |       |
| 17 |                                                                                                                                                           |       |             |        |       |
| 18 |                                                                                                                                                           |       |             |        |       |
| 19 | <i>Second cohort VHWs, overall correct care</i>                                                                                                           |       |             |        | 6057  |
| 20 | Months since iCCM services initiation                                                                                                                     | 1.007 | 0.989–1.025 | 0.475  |       |
| 21 |                                                                                                                                                           |       |             |        |       |
| 22 | <i>Second cohort VHWs, overall correct care, with spline knot at 6 months after iCCM care initiation</i>                                                  |       |             |        | 6061  |
| 23 | Months since iCCM services initiation - Months 1–6                                                                                                        | 1.068 | 0.971–1.175 | 0.175  |       |
| 24 | Months since iCCM services initiation - Months 7–30                                                                                                       | 0.998 | 0.973–1.022 | 0.845  |       |
| 25 |                                                                                                                                                           |       |             |        |       |
| 26 | <i>Second cohort VHWs, overall correct care, with spline knot at 18 months after iCCM care initiation</i>                                                 |       |             |        | 6047  |
| 27 | Months since iCCM services initiation - Months 1–18                                                                                                       | 1.027 | 1.004–1.050 | 0.023  |       |
| 28 | Months since iCCM services initiation - Months 19–30                                                                                                      | 0.963 | 0.926–1.000 | 0.053  |       |
| 29 |                                                                                                                                                           |       |             |        |       |
| 30 |                                                                                                                                                           |       |             |        |       |
| 31 | <i>Second cohort VHWs, overall correct care excluding referral of patients with negative RDT</i>                                                          |       |             |        | 5272  |
| 32 | Months since iCCM services initiation                                                                                                                     | 1.026 | 1.007–1.045 | 0.006  |       |

Abbreviations: CI, confidence interval; iCCM, Integrated Community Case Management; OR, odds ratio; QIC, quasi-likelihood under the independence model criterion; RDT, rapid diagnostic test for malaria; VHW, village health worker

\*Quasi-likelihood under the independence model criterion. This is a modification of the Akaike information criterion (AIC) so that it can be applied to GEE regression models to assess goodness of fit of different models. A lower QIC term reflects a better-fitting regression model.

\*\*One VHW joined the first cohort of VHWs later, and is thus excluded from this analysis

Failure to refer patients with a negative RDT to a health facility was a common error. We conducted a secondary analysis to assess whether the trends observed in the main models were driven solely by this error. Graphical depiction of correct referral of patients with a negative RDT for the first cohort of VHWs appeared to show worse performance over time; exclusion of this error appeared to moderate the trend toward decreasing quality of care in later months (Figure 1). Repeating the model with the outcome variable as overall correct care excluding referral of patients with negative RDT estimated essentially constant correctness of care over time (OR 0.999, 95% CI 0.993–1.004, p=0.632). The addition of a spline knot at the 3-year mark resulted in similar findings to using the main outcome variable of overall correct care (slightly increasing correctness of care up until the 3-year mark, followed by slightly decreasing correctness of care); see Table 4 and Figure 2.

1  
2  
3 For the second cohort of VHWs, modelling time as a continuous variable (months since the  
4 cohort began providing iCCM care) estimated essentially constant correctness of care over time  
5 (OR 1.007, 95% CI 0.989, 1.025,  $p=0.475$ ); see Table 4. Graphical depiction of overall correct  
6 care over time for the second cohort appeared to show a slight increase in correct care over  
7 approximately the first 6 months after iCCM program initiation, followed by a plateau and then  
8 a further increase until approximately 18 months, followed by a gradual decline (Figure 1).  
9 Based on the graphical appearance as well as our prior findings [17], we created two additional  
10 models, one with a spline knot at 6 months, and one with a spline knot at 18 months. The  
11 model with the spline knot at 6 months did not meaningfully change the result (months 1-6: OR  
12 1.068, 95% CI 0.971-1.175,  $p=0.175$ ; months 7-30: OR 0.998, 95% CI 0.973-1.022,  $p=0.845$ ). The  
13 model with the spline knot at 18 months showed some evidence of a trend toward increasing  
14 correctness of care over the first 18 months and decreasing correctness of care over the  
15 remaining 12 months (months 1-18: OR 1.027, 95% CI 1.004-1.050,  $p=0.023$ ; months 18-30: OR  
16 0.963, 95% CI 0.926-1.000,  $p=0.053$ ), with an improvement in model fit based on the QIC values  
17 (Table 4).  
18  
19  
20  
21  
22

23 We again conducted a secondary analysis using the outcome variable of overall correct care  
24 excluding referral of patients with negative RDT. Similar to the first cohort, graphical depiction  
25 of correct referral of patients with a negative RDT by VHWs in the second cohort appeared to  
26 show worse performance over time; exclusion of this error resulted in a relatively linear-  
27 appearing trend toward increasing correctness of care over time, followed by a slight decline  
28 over the final 6 months (Figure 1). Repeating the model with the outcome variable as correct  
29 care excluding referral of patients with negative RDT demonstrated a trend toward increasing  
30 correctness of care over time (OR 1.026, 95% CI 1.007-1.045,  $p=0.006$ ); see Table 4.  
31  
32  
33

## 34 DISCUSSION

35 Patient demographic data and presenting complaints were broadly similar between patients  
36 treated by the two cohorts of VHWs. Overall quality of care was slightly higher for the first  
37 cohort of VHWs compared with the second cohort (77% vs 68%). Both cohorts demonstrated  
38 high quality of care for uncomplicated malaria, pneumonia, and diarrhea (>90% on all measures  
39 for the first cohort, and >85% for all measures for the second cohort). Encouragingly, overuse of  
40 medications was fairly low in both cohorts as well. To the best of our knowledge, the program  
41 never experienced stockouts of medications, so VHWs' ability to provide correct care would not  
42 have been affected by unavailability of the necessary medication.  
43  
44  
45

46 These findings are broadly similar to our prior evaluation of quality of care in Bugoye as well as  
47 other studies in Uganda[7–9,17]. Studies on iCCM care in other countries in Sub-Saharan Africa  
48 have demonstrated greater heterogeneity. Some have documented correct care for 70–90% of  
49 encounters[18,26–28]. Others have documented lower quality of care overall[19,29] or in the  
50 control group or pre-assessment evaluation in several intervention studies[30,31]. Local context  
51 might explain some of the variation in quality of care. In this setting, all scheduled trainings  
52 took place (to the best of our knowledge), external funding ensured a consistent supply of  
53 diagnostic tests and medications, and monthly collection of paper record forms might have  
54  
55  
56  
57  
58  
59  
60

1  
2  
3 helped provide accountability. These factors might result in higher quality of care compared  
4 with settings in which iCCM is implemented more broadly.  
5  
6

7 In both cohorts, the proportion of patients with fever and negative malaria RDT appropriately  
8 referred to a health facility was quite low. Our prior evaluation also identified this as a common  
9 error[17], which prompted refresher training on this topic. The persistence of this error despite  
10 refresher training might indicate that this represents an intentional decision by VHWs rather  
11 than an unintentional error; perhaps VHWs have observed that such patients often have self-  
12 limiting viral illnesses and recover without intervention. For this error (as well as other errors),  
13 caregiver preferences or requests might also have influenced VHWs. For instance, caregivers  
14 might not wish to be referred to the health facility because of the time spent traveling to the  
15 facility and waiting to be seen. Some iCCM programs advise symptomatic management and at-  
16 home follow-up rather than referral for patients with subjective fever and a negative malaria  
17 RDT[11]. When this error was excluded, overall quality of care for all other patients was 84%  
18 and 76% in the first and second cohorts respectively. While inappropriate use of medications  
19 was fairly low, pressure from caregivers to provide a medication could also have influenced  
20 VHWs' treatment decisions.  
21  
22  
23  
24

25 VHWs did not perform as well for appropriate referral and pre-referral treatment of patients  
26 with danger signs. This finding is somewhat concerning as these patients are likely at highest  
27 risk of poor outcomes or death. Very few deaths were reported, though deaths might be  
28 underreported as VHWs might not update their clinical encounter record if a child later dies  
29 during that illness episode. Additionally, deaths might have occurred in children who were  
30 never evaluated by a VHW; caregivers who recognize that a child has severe illness might  
31 proceed directly to a health facility rather than seeking care from a VHW.  
32  
33  
34

35 We employed GEE regression models to examine trends in quality of care over time (GEE  
36 models estimate a population average effect, so these trends should be interpreted as such).  
37 For the first cohort of VHWs, quality of care appeared to increase modestly until approximately  
38 3 years after their initial iCCM training, followed by a gradual decrease in quality of care. For  
39 the second cohort of VHWs, quality of care was essentially constant over time. This finding is in  
40 contrast to our prior study demonstrating increasing quality of care over the first 6 months in  
41 the first cohort of VHWs[17]. There are several potential explanations for the trend toward  
42 decreasing quality of care for the first cohort in the later years. Uganda relies on an all-  
43 volunteer VHWs workforce, which could result in decreased motivation over time or a need to  
44 focus on income-generating activities instead of volunteer work. Alternatively, as VHWs gain  
45 experience and are further from their initial training, they may begin to rely more on clinical  
46 judgment and follow the iCCM protocol less closely. However, based on the secondary analysis,  
47 the decline in quality of care persists even when the error of failing to refer patients with a  
48 negative RDT is excluded. Another potential explanation for this trend would be higher  
49 engagement and interest from supervisors in the earlier years of the program, though we are  
50 not aware of any concrete changes in frequency of trainings, supervision schedule, incentives,  
51 or other such factors in this program. Alternatively, there could have been changes in care-  
52 seeking behaviors or expectations over time (e.g., caregivers bringing children with a broader  
53  
54  
55  
56  
57  
58  
59  
60

1  
2  
3 range of illnesses to VHWs as the program became more established); we could not  
4 meaningfully examine this using the available records.  
5

6  
7 More broadly, several years represents a substantial follow-up period for a study but not such a  
8 substantial period for a health system. From this standpoint, the modest decline in quality of  
9 care over time might point to the challenge of relying on a volunteer workforce to fill a critical  
10 role in the health system. Some prior studies examining Integrated Management of Childhood  
11 Illness and long-term trends in quality of facility-based care for malaria or other life-threatening  
12 pediatric illnesses have documented consistent improvements in quality of care[32,33], though  
13 other factors apart from the paid status of these healthcare workers could explain this  
14 discrepancy. While iCCM has the potential to increase access to potentially lifesaving care,  
15 broader implementation and longer-term reliance on this approach should be accompanied by  
16 monitoring and evaluation of quality of care.  
17  
18

19  
20 This study has at least 5 limitations. First, while we conducted some data cleaning and assessed  
21 for duplicate entries as detailed above, these data were not double-entered. Given the large  
22 volume of clinical encounters, some data entry errors likely persist. However, such errors are  
23 less likely to cause systematic bias. Second, some elements of correct care are not captured on  
24 the paper registers, and thus cannot be assessed here (e.g., correct drug dosages), which may  
25 overestimate quality of care. More broadly, a record review approach cannot capture whether  
26 or how much health education is provided, or VHWs' ability to assess children's overall health  
27 and identify more chronic issues such as malnutrition. Third, this study assesses quality of  
28 recorded care rather than quality of actual care. In some instances, this may overestimate  
29 quality of care—e.g., we cannot assess whether a VHW correctly performed and interpreted a  
30 malaria RDT or measured respiratory rate correctly. In other cases, a VHW could provide  
31 correct care but have the encounter classified as incorrect due to incomplete record-keeping.  
32 For instance, because the words for “fever” and “malaria” are often used interchangeably in the  
33 local language, some VHWs seem to have recorded a patient as having subjective fever only if  
34 the malaria RDT was positive. For a patient with a negative RDT, this misunderstanding would  
35 make it appear that the VHW had incorrectly performed an RDT for a patient without subjective  
36 fever (when in fact the RDT was appropriately performed). Overall however, prior research  
37 suggests that record review somewhat overestimates quality of care when compared with  
38 direct observation of VHWs with reexamination by a clinician[5,6]. Fourth, because the data are  
39 deidentified and lack a reliable unique identifier variable, two or more illness episodes for the  
40 same child may be included. However, this issue is unlikely to affect the results significantly, as  
41 quality of care for different episodes of illness for a given individual are not necessarily  
42 correlated (beyond the correlation of receiving care from the same VHW). Fifth, while this study  
43 assesses a large number of patient encounters, it includes a fairly small number of VHWs in a  
44 single geographic area, limiting its generalizability.  
45  
46  
47  
48  
49  
50

## 51 52 **CONCLUSION**

53 Overall, we found that VHWs continue to provide quality care for uncomplicated malaria,  
54 pneumonia, and diarrhea nearly 5 years after initial training, though with a trend toward  
55 decreasing quality of care during the later period and with lower quality of care for patients  
56  
57  
58  
59

with danger signs. The trend toward decreasing quality of care starting several years after iCCM care initiation points to the importance of long-term monitoring of quality of care by iCCM programs.

### List of abbreviations

ACT: artemisinin combination therapy; GEE: generalized estimating equations; iCCM: Integrated Community Case Management; ORS: oral rehydration solution; QIC: quasi-likelihood under the independence criterion; RDT: rapid diagnostic test; VHW: village health worker

### Acknowledgments:

We are grateful to Sarah Masika, Rapheal Mbusa, Stephen Baguma, Sara Mian-McCarthy, and Emily Cable for their work in administering and supporting the village health worker program in Bugoye. We are grateful to all the village health workers for volunteering to provide critical services to their communities.

**Competing interests:** The authors declare that they have no competing interests

**Funding:** This work was supported by the Mooney-Reed Charitable Foundation (Award/Grant number is not applicable) and the Massachusetts General Hospital Department of Medicine (Award/Grant number is not applicable).

**Ethical review:** Ethical approval for this study was granted by the Partners Healthcare IRB (2016P001423) and the Research Ethics Committee at the Mbarara University of Science and Technology (14/06-16). Because the study involved only analysis of deidentified clinical records, individual patients' caregivers were not consented for the study.

**Authors' contributions:** JSM, EMM, JK, RR, and GSS conceived and designed the study. ACW and EMM led data collection, with contributions from NM, JM, MM, MN, DAG, PRP, SB, and JSM. JSM led data analysis, with contributions from ACW and EMM. JSM and EMM drafted initial versions of the manuscript. All authors contributed to manuscript writing and approved the final manuscript.

**Data sharing statement:** Data are available for non-commercial use from the corresponding author (jsmiller@post.harvard.edu) upon reasonable request.

### References

- 1 World Health Organization, UNICEF. WHO/UNICEF Joint Statement: Integrated Community Case Management (iCCM). 2012. [https://www.who.int/maternal\\_child\\_adolescent/documents/statement\\_child\\_services\\_access\\_whounicef.pdf](https://www.who.int/maternal_child_adolescent/documents/statement_child_services_access_whounicef.pdf) (accessed 29 Oct 2021).

- 2 Republic of Uganda Ministry of Health. Village Health Team Strategy and Operational Guidelines. 2010. <http://library.health.go.ug/publications/health-education/village-health-team-strategy-and-operational-guidelines> (accessed 12 Sep 2020).
- 3 Republic of Uganda Ministry of Health. National Village Health Teams (VHT) assessment in Uganda. 2015. <http://library.health.go.ug/publications/health-education/national-village-health-teamsvht-assessment-uganda> (accessed 12 Sep 2020).
- 4 The Republic of Uganda Ministry of Health. Integrated Community Case Management of Childhood Malaria, Pneumonia and Diarrhoea: Implementation Guidelines. 2010. <http://library.health.go.ug/publications/child-health-school-health/integrated-community-case-management-childhood-malaria> (accessed 25 Jul 2020).
- 5 Cardemil CV, Gilroy KE, Callaghan-Koru JA, *et al.* Comparison of methods for assessing quality of care for community case management of sick children: an application with community health workers in Malawi. *Am J Trop Med Hyg* 2012;**87**:127–36. doi:10.4269/ajtmh.2012.12-0389
- 6 Miller NP, Amouzou A, Hazel E, *et al.* Assessing the Quality of Sick Child Care Provided by Community Health Workers. *PloS One* 2015;**10**:e0142010. doi:10.1371/journal.pone.0142010
- 7 Mukanga D, Babirye R, Peterson S, *et al.* Can lay community health workers be trained to use diagnostics to distinguish and treat malaria and pneumonia in children? Lessons from rural Uganda. *Trop Med Int Health* 2011;**16**:1234–42. doi:10.1111/j.1365-3156.2011.02831.x
- 8 Awor P, Wamani H, Tylleskar T, *et al.* Drug seller adherence to clinical protocols with integrated management of malaria, pneumonia and diarrhoea at drug shops in Uganda. *Malar J* 2015;**14**:277. doi:10.1186/s12936-015-0798-9
- 9 Soremekun S, Kasteng F, Lingam R, *et al.* Variation in the quality and out-of-pocket cost of treatment for childhood malaria, diarrhoea, and pneumonia: Community and facility based care in rural Uganda. *PloS One* 2018;**13**:e0200543. doi:10.1371/journal.pone.0200543
- 10 Kalyango JN, Rutebemberwa E, Alfven T, *et al.* Performance of community health workers under integrated community case management of childhood illnesses in eastern Uganda. *Malar J* 2012;**11**:282. doi:10.1186/1475-2875-11-282
- 11 Hamer DH, Brooks ET, Semrau K, *et al.* Quality and safety of integrated community case management of malaria using rapid diagnostic tests and pneumonia by community health workers. *Pathog Glob Health* 2012;**106**:32–9. doi:10.1179/1364859411y.0000000042
- 12 Yeboah-Antwi K, Pilingana P, Macleod WB, *et al.* Community case management of fever due to malaria and pneumonia in children under five in Zambia: a cluster randomized controlled trial. *PLoS Med* 2010;**7**:e1000340. doi:10.1371/journal.pmed.1000340



- 13 Rowe SY, Kelly JM, Olewe MA, *et al.* Effect of multiple interventions on community health workers' adherence to clinical guidelines in Siaya district, Kenya. *Trans R Soc Trop Med Hyg* 2007;**101**:188–202. doi:10.1016/j.trstmh.2006.02.023
- 14 Miller NP, Amouzou A, Tafesse M, *et al.* Integrated community case management of childhood illness in Ethiopia: implementation strength and quality of care. *Am J Trop Med Hyg* 2014;**91**:424–34. doi:10.4269/ajtmh.13-0751
- 15 Mukanga D, Tiono AB, Anyorigiya T, *et al.* Integrated community case management of fever in children under five using rapid diagnostic tests and respiratory rate counting: a multi-country cluster randomized trial. *Am J Trop Med Hyg* 2012;**87**:21–9. doi:10.4269/ajtmh.2012.11-0816
- 16 Kelly JM, Osamba B, Garg RM, *et al.* Community health worker performance in the management of multiple childhood illnesses: Siaya District, Kenya, 1997-2001. *Am J Public Health* 2001;**91**:1617–24.
- 17 Miller JS, English L, Matte M, *et al.* Quality of care in integrated community case management services in Bugoye, Uganda: a retrospective observational study. *Malar J* 2018;**17**:99. doi:10.1186/s12936-018-2241-5
- 18 Baynes C, Mboya D, Likasi S, *et al.* Quality of Sick Child-Care Delivered by Community Health Workers in Tanzania. *Int J Health Policy Manag* 2018;**7**:1097–109. doi:10.15171/ijhpm.2018.63
- 19 Gilroy KE, Callaghan-Koru JA, Cardemil CV, *et al.* Quality of sick child care delivered by Health Surveillance Assistants in Malawi. *Health Policy Plan* 2013;**28**:573–85. doi:10.1093/heapol/czs095
- 20 Counihan H, Harvey SA, Sekeseke-Chinyama M, *et al.* Community health workers use malaria rapid diagnostic tests (RDTs) safely and accurately: results of a longitudinal study in Zambia. *Am J Trop Med Hyg* 2012;**87**:57–63. doi:10.4269/ajtmh.2012.11-0800
- 21 Boyce MR, Menya D, Turner EL, *et al.* Evaluation of malaria rapid diagnostic test (RDT) use by community health workers: a longitudinal study in western Kenya. *Malar J* 2018;**17**:206. doi:10.1186/s12936-018-2358-6
- 22 Miller JS, Mbusa RK, Baguma S, *et al.* Assessing Village Health Workers' Ability to Perform and Interpret Rapid Diagnostic Tests for Malaria 4 Years after Initial Training: A Cross-Sectional Study. *Am J Trop Med Hyg* Published Online First: 2 November 2020. doi:10.4269/ajtmh.20-0747
- 23 Christiansen TB; Lauritsen JM. *EpiData - Comprehensive Data Management and Basic Statistical Analysis System, Version 3*. Odense Denmark: : EpiData Association <http://www.epidata.dk>



- 1
  - 2
  - 3
  - 4
  - 5
  - 6
  - 7
  - 8
  - 9
  - 10
  - 11
  - 12
  - 13
  - 14
  - 15
  - 16
  - 17
  - 18
  - 19
  - 20
  - 21
  - 22
  - 23
  - 24
  - 25
  - 26
  - 27
  - 28
  - 29
  - 30
  - 31
  - 32
  - 33
  - 34
  - 35
  - 36
  - 37
  - 38
  - 39
  - 40
  - 41
  - 42
  - 43
  - 44
  - 45
  - 46
  - 47
  - 48
  - 49
  - 50
  - 51
  - 52
  - 53
  - 54
  - 55
  - 56
  - 57
  - 58
  - 59
  - 60
- 24 Harris PA, Taylor R, Thielke R, *et al.* Research electronic data capture (REDCap)—A metadata-driven methodology and workflow process for providing translational research informatics support. *J Biomed Inform* 2009;**42**:377–81. doi:10.1016/j.jbi.2008.08.010
- 25 Miller JS, Patel P, Mian-McCarthy S, *et al.* Usage of and satisfaction with Integrated Community Case Management care in western Uganda: a cross-sectional survey. *Malar J* 2021;**20**:65. doi:10.1186/s12936-021-03601-9
- 26 Sinyangwe C, Graham K, Nicholas S, *et al.* Assessing the Quality of Care for Pneumonia in Integrated Community Case Management: A Cross-Sectional Mixed Methods Study. *PLoS One* 2016;**11**:e0152204. doi:10.1371/journal.pone.0152204
- 27 Zakus D, Moussa M, Ezechiel M, *et al.* Clinical evaluation of the use of an mhealth intervention on quality of care provided by Community Health Workers in southwest Niger. *J Glob Health* 2019;**9**:010812. doi:10.7189/jogh.09.010812
- 28 Graham K, Sinyangwe C, Nicholas S, *et al.* Rational use of antibiotics by community health workers and caregivers for children with suspected pneumonia in Zambia: a cross-sectional mixed methods study. *BMC Public Health* 2016;**16**:897. doi:10.1186/s12889-016-3541-8
- 29 Munos M, Guiella G, Roberton T, *et al.* Independent Evaluation of the Rapid Scale-Up Program to Reduce Under-Five Mortality in Burkina Faso. *Am J Trop Med Hyg* Published Online First: 19 January 2016. doi:10.4269/ajtmh.15-0585
- 30 Langston A, Wittcoff A, Ngoy P, *et al.* Testing a simplified tool and training package to improve integrated Community Case Management in Tanganyika Province, Democratic Republic of Congo: a quasi-experimental study. *J Glob Health* 2019;**9**:010810. doi:10.7189/jogh.09.010810
- 31 Boyce SP, Nyangara F, Kamunyori J. A mixed-methods quasi-experimental evaluation of a mobile health application and quality of care in the integrated community case management program in Malawi. *J Glob Health* 2019;**9**:010811. doi:10.7189/jogh.09.010811
- 32 Rowe AK, Onikpo F, Lama M, *et al.* Impact of a malaria-control project in Benin that included the integrated management of childhood illness strategy. *Am J Public Health* 2011;**101**:2333–41. doi:10.2105/AJPH.2010.300068
- 33 Amboko B, Stepniewska K, Malla L, *et al.* Determinants of improvement trends in health workers' compliance with outpatient malaria case-management guidelines at health facilities with available "test and treat" commodities in Kenya. *PLOS ONE* 2021;**16**:e0259020. doi:10.1371/journal.pone.0259020

**Figure 1:** Lowess smoothing plots for correct management over time. Plots A–C correspond to the first cohort of VHWs. Plot A shows overall correct care over time. Plot B shows correct

1  
2  
3 referral of patients with a negative malaria rapid diagnostic test (RDT) over time. Plot C shows  
4 overall correct care over time, excluding the error of failing to refer patients with a negative  
5 malaria RDT. Plots D–F depict the second cohort of VHWs. Plot D shows overall correct care  
6 over time. Plot E correct referral of patients with a negative malaria RDT over time. Plot F  
7 shows overall correct care over time, excluding the error of failing to refer patients with a  
8 negative malaria RDT.  
9  
10

11  
12 **Figure 2:** Post-estimation margins plots for GEE logistic regression models with spline knots,  
13 which display the predicted probability of receiving correct care at specified time points (6-  
14 month intervals). Plots A and B depict the first cohort of VHWs. Plot A shows the predicted  
15 probability of overall correct care, with a spline knot 3 years after the first cohort began  
16 providing iCCM care. Plot B shows the predicted probability of overall correct care excluding the  
17 error of failing to refer patients with a negative malaria rapid diagnostic test (RDT), again with a  
18 spline knot at 3 years. Plots C and D depict the second cohort of VHWs. Plot C shows the  
19 predicted probability of overall correct care, with a spline knot 6 months after the second  
20 cohort began providing iCCM care. Plot D again shows the predicted probability of overall  
21 correct care, but with a spline knot at 18 months.  
22  
23  
24  
25  
26  
27  
28  
29  
30  
31  
32  
33  
34  
35  
36  
37  
38  
39  
40  
41  
42  
43  
44  
45  
46  
47  
48  
49  
50  
51  
52  
53  
54  
55  
56  
57  
58  
59  
60

1 **A**

2  
3  
4  
5  
6  
7  
8  
9  
10  
11  
12  
13  
14  
15  
16  
17  
18  
19  
20



**B**

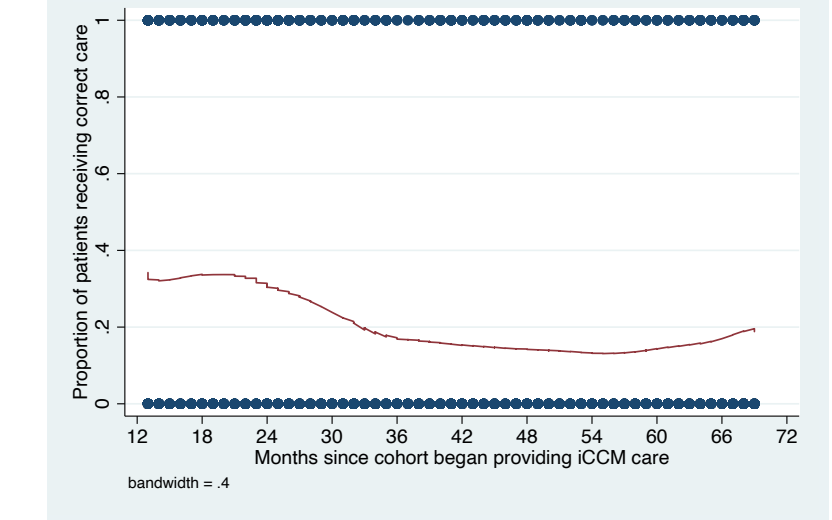

**C**

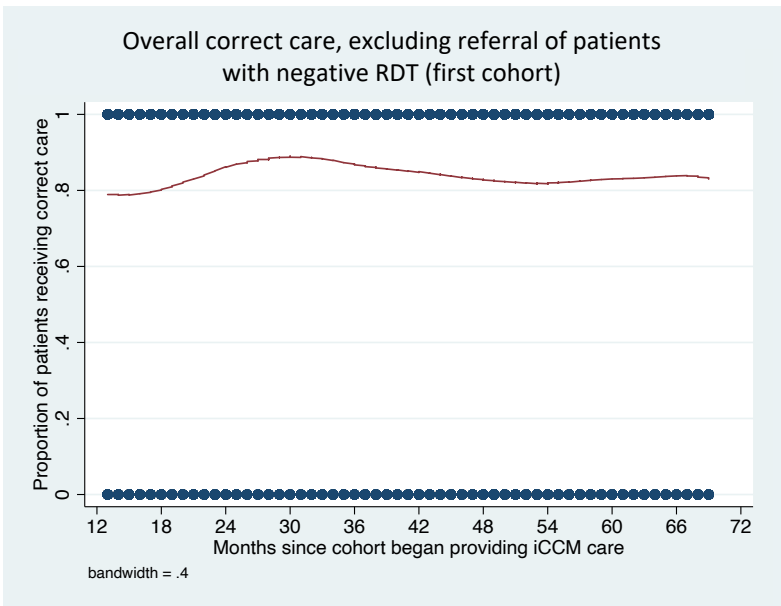

21 **D**

22  
23  
24  
25  
26  
27  
28  
29  
30  
31  
32  
33  
34  
35  
36  
37  
38  
39  
40  
41



**E**

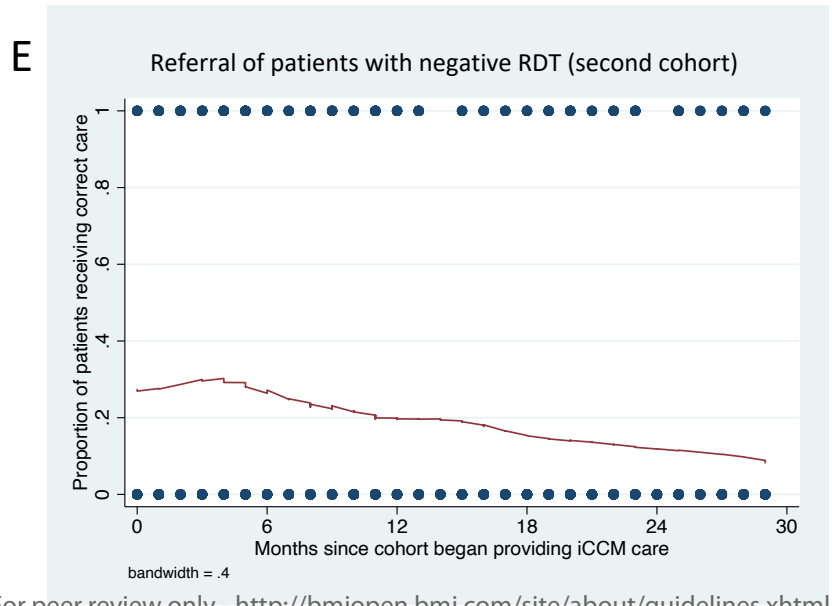

**F**

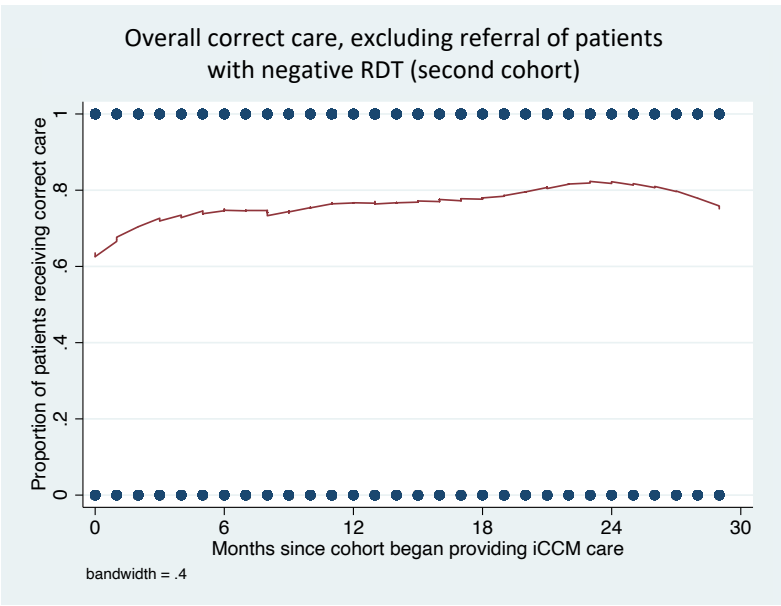

A

Overall correct care, with spline knot at 3 years (first cohort)

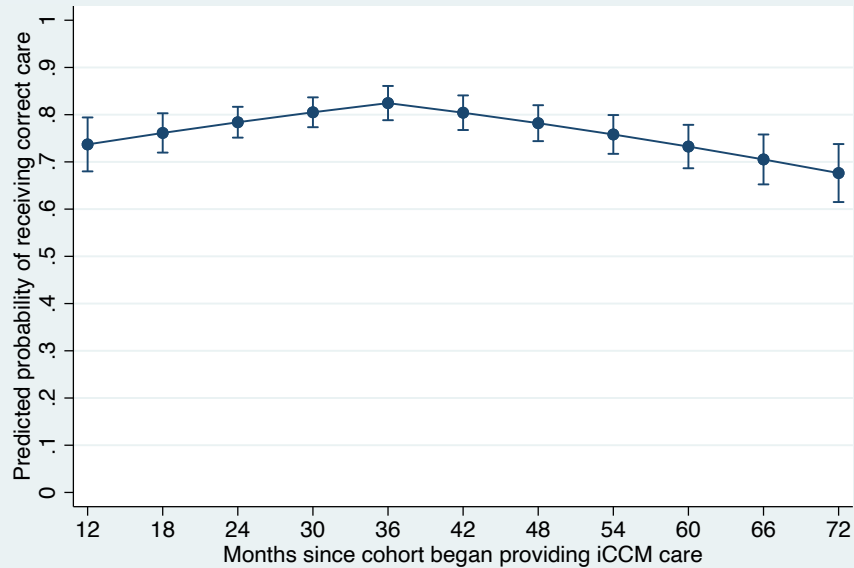

B

Overall correct care excluding referral of patients with negative RDT, with spline knot at 3 years (first cohort)

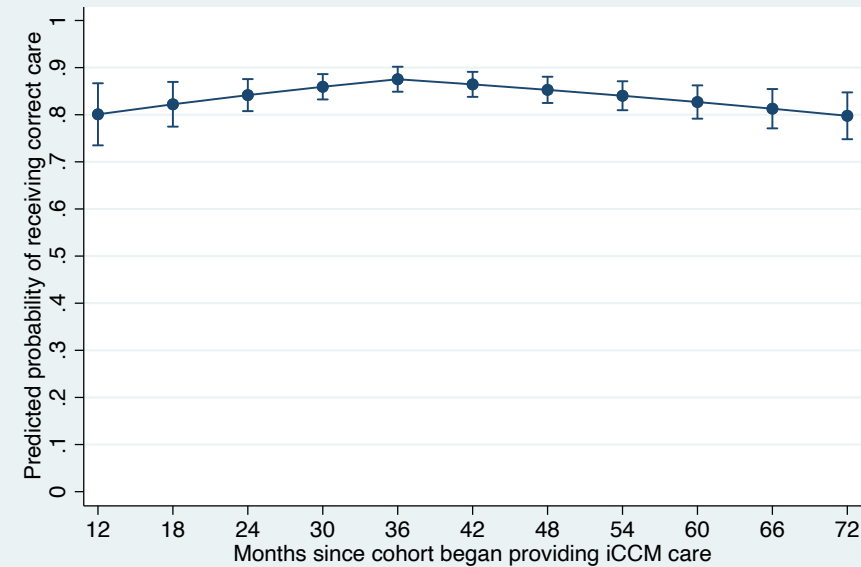

C

Overall correct care, with spline knot at 6 months (second cohort)

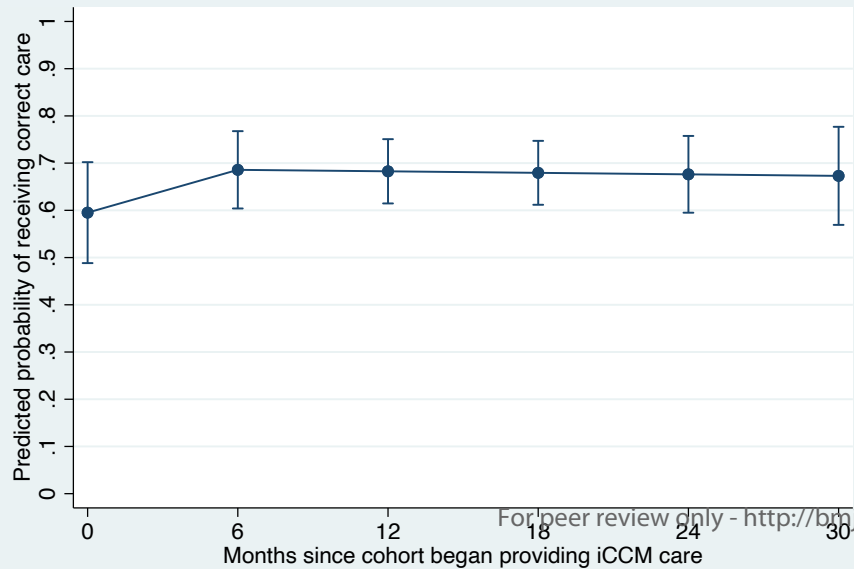

D

Overall correct care, with spline knot at 18 months (second cohort)

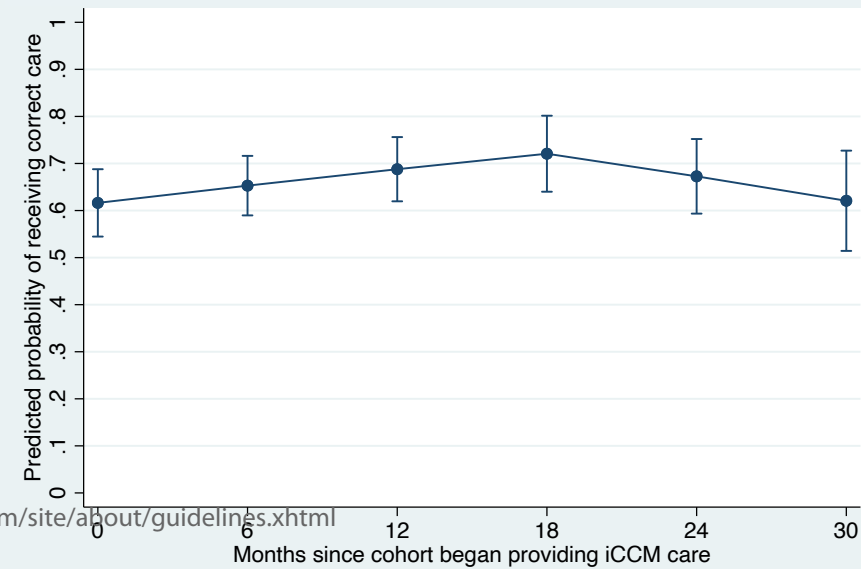

1  
2  
3  
4  
5  
6  
7  
8  
9  
10  
11  
12  
13  
14  
15  
16  
17  
18  
19  
20  
21  
22  
23  
24  
25  
26  
27  
28  
29  
30  
31  
32  
33  
34  
35  
36  
37  
38  
39  
40  
41

STROBE Statement—Checklist of items that should be included in reports of *cohort studies*

|                              | Item No | Recommendation                                                                                                                                                                                                                                                                                                         | Page No |
|------------------------------|---------|------------------------------------------------------------------------------------------------------------------------------------------------------------------------------------------------------------------------------------------------------------------------------------------------------------------------|---------|
| <b>Title and abstract</b>    | 1       | (a) Indicate the study's design with a commonly used term in the title or the abstract<br>(b) Provide in the abstract an informative and balanced summary of what was done and what was found                                                                                                                          | 1       |
| <b>Introduction</b>          |         |                                                                                                                                                                                                                                                                                                                        |         |
| Background/rationale         | 2       | Explain the scientific background and rationale for the investigation being reported                                                                                                                                                                                                                                   | 3-4     |
| Objectives                   | 3       | State specific objectives, including any prespecified hypotheses                                                                                                                                                                                                                                                       | 4       |
| <b>Methods</b>               |         |                                                                                                                                                                                                                                                                                                                        |         |
| Study design                 | 4       | Present key elements of study design early in the paper                                                                                                                                                                                                                                                                | 4       |
| Setting                      | 5       | Describe the setting, locations, and relevant dates, including periods of recruitment, exposure, follow-up, and data collection                                                                                                                                                                                        | 4       |
| Participants                 | 6       | (a) Give the eligibility criteria, and the sources and methods of selection of participants. Describe methods of follow-up<br>(b) For matched studies, give matching criteria and number of exposed and unexposed                                                                                                      | 4       |
| Variables                    | 7       | Clearly define all outcomes, exposures, predictors, potential confounders, and effect modifiers. Give diagnostic criteria, if applicable                                                                                                                                                                               | 5       |
| Data sources/<br>measurement | 8*      | For each variable of interest, give sources of data and details of methods of assessment (measurement). Describe comparability of assessment methods if there is more than one group                                                                                                                                   | 5-6     |
| Bias                         | 9       | Describe any efforts to address potential sources of bias                                                                                                                                                                                                                                                              | 5       |
| Study size                   | 10      | Explain how the study size was arrived at                                                                                                                                                                                                                                                                              | n/a     |
| Quantitative variables       | 11      | Explain how quantitative variables were handled in the analyses. If applicable, describe which groupings were chosen and why                                                                                                                                                                                           | n/a     |
| Statistical methods          | 12      | (a) Describe all statistical methods, including those used to control for confounding<br>(b) Describe any methods used to examine subgroups and interactions<br>(c) Explain how missing data were addressed<br>(d) If applicable, explain how loss to follow-up was addressed<br>(e) Describe any sensitivity analyses | 5       |
| <b>Results</b>               |         |                                                                                                                                                                                                                                                                                                                        |         |
| Participants                 | 13*     | (a) Report numbers of individuals at each stage of study—eg numbers potentially eligible, examined for eligibility, confirmed eligible, included in the study, completing follow-up, and analysed<br>(b) Give reasons for non-participation at each stage<br>(c) Consider use of a flow diagram                        | 6       |
| Descriptive data             | 14*     | (a) Give characteristics of study participants (eg demographic, clinical, social) and information on exposures and potential confounders<br>(b) Indicate number of participants with missing data for each variable of interest<br>(c) Summarise follow-up time (eg, average and total amount)                         | 6       |
| Outcome data                 | 15*     | Report numbers of outcome events or summary measures over time                                                                                                                                                                                                                                                         | 6-7     |

|    |                          |                                                                                                                  |                                                                                                                                                                                                              |      |
|----|--------------------------|------------------------------------------------------------------------------------------------------------------|--------------------------------------------------------------------------------------------------------------------------------------------------------------------------------------------------------------|------|
| 1  | Main results             | 16                                                                                                               | (a) Give unadjusted estimates and, if applicable, confounder-adjusted estimates and their precision (eg, 95% confidence interval). Make clear which confounders were adjusted for and why they were included | 9-10 |
| 2  |                          | (b) Report category boundaries when continuous variables were categorized                                        |                                                                                                                                                                                                              |      |
| 3  |                          | (c) If relevant, consider translating estimates of relative risk into absolute risk for a meaningful time period |                                                                                                                                                                                                              |      |
| 4  | Other analyses           | 17                                                                                                               | Report other analyses done—eg analyses of subgroups and interactions, and sensitivity analyses                                                                                                               | 9-10 |
| 5  | <b>Discussion</b>        |                                                                                                                  |                                                                                                                                                                                                              |      |
| 6  | Key results              | 18                                                                                                               | Summarise key results with reference to study objectives                                                                                                                                                     | 11   |
| 7  | Limitations              | 19                                                                                                               | Discuss limitations of the study, taking into account sources of potential bias or imprecision. Discuss both direction and magnitude of any potential bias                                                   | 12   |
| 8  | Interpretation           | 20                                                                                                               | Give a cautious overall interpretation of results considering objectives, limitations, multiplicity of analyses, results from similar studies, and other relevant evidence                                   | 12   |
| 9  | Generalisability         | 21                                                                                                               | Discuss the generalisability (external validity) of the study results                                                                                                                                        | 11   |
| 10 | <b>Other information</b> |                                                                                                                  |                                                                                                                                                                                                              |      |
| 11 | Funding                  | 22                                                                                                               | Give the source of funding and the role of the funders for the present study and, if applicable, for the original study on which the present article is based                                                | 13   |

\*Give information separately for exposed and unexposed groups.

**Note:** An Explanation and Elaboration article discusses each checklist item and gives methodological background and published examples of transparent reporting. The STROBE checklist is best used in conjunction with this article (freely available on the Web sites of PLoS Medicine at <http://www.plosmedicine.org/>, Annals of Internal Medicine at <http://www.annals.org/>, and Epidemiology at <http://www.epidem.com/>). Information on the STROBE Initiative is available at <http://www.strobe-statement.org>.
